# Supplementary material
Source: PubMed Central journal article supplement (PMC3093670)
Supplement: NIHMS286972-supplement-01.pdf [file NIHMS286972-supplement-01.pdf]

**Supplementary Table 1: Physiological Measurements on Individual Animals**

| Rat ID | Strain | Diet | Age (wks) | Blood glucose (mg/dL) | HbA1c % | Body wt (g) | Liver wt (g) | Abdominal fat (g) |
|--------|--------|------|-----------|-----------------------|---------|-------------|--------------|-------------------|
| DD101  | WKY    | N    | 4         | 155                   | 4       | 86.6        | 3.89         | 0.16              |
| DD102  | WKY    | N    | 4         | 135                   | 4.1     | 94.5        | 5.01         | 0.34              |
| DD103  | WKY    | N    | 4         | 131                   | < 4     | 88.1        | 3.39         | 0.2               |
| DD104  | WKY    | N    | 4         | 135                   | 4.4     | 118.4       | 6.07         | 0.48              |
| DD105  | WKY    | N    | 4         | 148                   | 4.5     | 83.2        | 3.87         | 0.14              |
| DD106  | WKY    | N    | 4         | 131                   | 4.1     | 82.9        | 3.92         | 0.28              |
| DD81   | GK     | N    | 4         | 209                   | 4.7     | 106.1       | 4.92         | 0.49              |
| DD82   | GK     | N    | 4         | 227                   | 4.6     | 113.8       | 5.73         | 0.58              |
| DD83   | GK     | N    | 4         | 193                   | 4.7     | 92.3        | 4.45         | 0.31              |
| DD84   | GK     | N    | 4         | 209                   | 4.6     | 108.2       | 5.24         | 0.33              |
| DD85   | GK     | N    | 4         | 197                   | 4.5     | 92.2        | 4.21         | 0.23              |
| DD86   | GK     | N    | 4         | 204                   | 4.6     | 112.5       | 5.04         | 0.6               |
| DD107  | WKY    | N    | 8         | 171                   | < 4     | 315.9       | 14.96        | 2.85              |
| DD108  | WKY    | N    | 8         | 150                   | 4.1     | 326.2       | 15.72        | 3.88              |
| DD61   | WKY    | N    | 8         | 154                   | NA      | 258         | 11.62        | 1.32              |
| DD62   | WKY    | N    | 8         | 150                   | 4.4     | 284.1       | 12.79        | 3.34              |
| DD63   | WKY    | N    | 8         | 194                   | 4.6     | 292.2       | 13.35        | 2.11              |
| DD64   | WKY    | N    | 8         | 148                   | 4.5     | 314.2       | 14.35        | 2.13              |
| DD41   | GK     | N    | 8         | 339                   | 5.7     | 257.7       | 13.41        | 2.63              |
| DD42   | GK     | N    | 8         | 235                   | 5.6     | 244.5       | 11.63        | 2.38              |
| DD43   | GK     | N    | 8         | 293                   | 5.7     | 257.1       | 12.69        | 2.37              |
| DD44   | GK     | N    | 8         | 249                   | 5.5     | 264.8       | 13.1         | 2.64              |
| DD87   | GK     | N    | 8         | 263                   | 5.6     | 248         | 12.26        | 2.76              |
| DD88   | GK     | N    | 8         | 234                   | 7       | 264.4       | 13.97        | 3.64              |
| DD109  | WKY    | N    | 12        | 144                   | 5       | 493.2       | 21.83        | 7.15              |
| DD110  | WKY    | N    | 12        | 136                   | 5.3     | 451.2       | 15.64        | 7.84              |
| DD21   | WKY    | N    | 12        | 174                   | 5.2     | 465.4       | 20.27        | 7.53              |
| DD22   | WKY    | N    | 12        | 150                   | 5.4     | 355.1       | 11.64        | 4.56              |
| DD23   | WKY    | N    | 12        | 143                   | 5.8     | 486.1       | 17.34        | 12.52             |
| DD24   | WKY    | N    | 12        | 157                   | 5.1     | 425.3       | 15.07        | 6.53              |
| DD1    | GK     | N    | 12        | > 600                 | 10.4    | 320.4       | 14.82        | 3.99              |
| DD2    | GK     | N    | 12        | > 600                 | 11.8    | 301         | 13.91        | 4                 |
| DD3    | GK     | N    | 12        | 445                   | 8.8     | 305.9       | 13.6         | 4.73              |
| DD4    | GK     | N    | 12        | 403                   | 7.6     | 337.5       | 14.73        | 5.35              |
| DD89   | GK     | N    | 12        | > 600                 | 8.1     | 333.6       | 14.42        | 4.91              |
| DD90   | GK     | N    | 12        | 572                   | 8.6     | 301.6       | 13.24        | 4.26              |
| DD65   | WKY    | N    | 16        | 165                   | 5       | 474.9       | 16.92        | 7.3               |
| DD66   | WKY    | N    | 16        | 166                   | 5       | 537.8       | 21.44        | 17.71             |
| DD67   | WKY    | N    | 16        | 152                   | 4.9     | 446         | 14.68        | 2.55              |
| DD68   | WKY    | N    | 16        | 155                   | 5.4     | 464.1       | 16.15        | 5.9               |
| DD69   | WKY    | N    | 16        | 156                   | 5       | 520.9       | 20.35        | 9.77              |
| DD70   | WKY    | N    | 16        | 148                   | 5.4     | 578.2       | 20.21        | 22.55             |
| DD45   | GK     | N    | 16        | 195                   | 6.3     | 383.6       | 13.86        | 5.77              |
| DD46   | GK     | N    | 16        | 464                   | 8.1     | 385.7       | 14.4         | 7.69              |
| DD47   | GK     | N    | 16        | > 600                 | 10.3    | 373.8       | 15.45        | 5.62              |
| DD48   | GK     | N    | 16        | > 600                 | 11.3    | 375.7       | 16.54        | 3.97              |
| DD49   | GK     | N    | 16        | > 600                 | 12.1    | 353.4       | 15.88        | 3.36              |
| DD50   | GK     | N    | 16        | > 600                 | 11.9    | 368.3       | 15.68        | 3.66              |
| DD25   | WKY    | N    | 20        | 176                   | 5.1     | 506.5       | 15.56        | 9.99              |
| DD26   | WKY    | N    | 20        | 173                   | 5.2     | 648         | 24           | 29.49             |
| DD27   | WKY    | N    | 20        | 169                   | 4.7     | 536.6       | 17.23        | 13.53             |
| DD28   | WKY    | N    | 20        | 235                   | 4.9     | 539.9       | 18.56        | 15.08             |
| DD29   | WKY    | N    | 20        | 172                   | 4.7     | 567         | 18.8         | 10.06             |
| DD30   | WKY    | N    | 20        | 205                   | 4.9     | 534.9       | 16.55        | 7.04              |
| DD10   | GK     | N    | 20        | 562                   | 10.1    | 379.4       | 15.83        | 4.72              |
| DD5    | GK     | N    | 20        | > 600                 | 11.8    | 345.7       | 15.21        | 3.25              |
| DD6    | GK     | N    | 20        | > 600                 | 12.1    | 369.8       | 17.79        | 3.93              |
| DD7    | GK     | N    | 20        | 580                   | 10.5    | 347.7       | 14.17        | 3.73              |
| DD8    | GK     | N    | 20        | > 600                 | 11.1    | 364.4       | 16.17        | 4.47              |
| DD9    | GK     | N    | 20        | > 600                 | 12.2    | 417.4       | 18.59        | 4.85              |

**Cont'd Supplementary Table 1: Physiological Measurements on Individual Animals**

| <b>Rat ID</b> | <b>Epididymal Fat (g)</b> | <b>Muscle (g)</b> | <b>Leptin (pg/ml)</b> | <b>Plasma glucose (mg/dL)</b> | <b>Adiponectin (ng/ml)</b> |
|---------------|---------------------------|-------------------|-----------------------|-------------------------------|----------------------------|
| DD101         | 0.3                       | 0.74              | 21810.51              | 120.9                         | 19023.16                   |
| DD102         | 0.43                      | 0.76              | 14626.95              | 119.7                         | 11440.4                    |
| DD103         | 0.34                      | 0.66              | 13768.16              | 119.1                         | 14970.29                   |
| DD104         | 0.55                      | 0.96              | 18497.62              | 134.2                         | 10111.33                   |
| DD105         | 0.26                      | 0.64              | 19702.79              | 102.9                         | 12239.42                   |
| DD106         | ND                        | 0.64              | 12601.3               | 111.7                         | 14575.88                   |
| DD81          | 0.54                      | 0.92              | 24805.79              | 236.4                         | 17951.4                    |
| DD82          | 0.62                      | 1.05              | 20385.79              | 254.4                         | 20722.15                   |
| DD83          | 0.4                       | 0.8               | 17755.63              | 215.4                         | 19823.62                   |
| DD84          | 0.37                      | 0.95              | 17666.25              | 214.7                         | 21461.51                   |
| DD85          | 0.33                      | 0.83              | 12163.23              | 205.2                         | 21705.85                   |
| DD86          | 0.56                      | 0.96              | 18315.1               | 232.3                         | 19475.27                   |
| DD107         | 3.01                      | 2.41              | 37641.92              | 149                           | 9725.55                    |
| DD108         | 4.39                      | 3.08              | 39434.35              | 151.2                         | 8636.71                    |
| DD61          | 1.93                      | 2.13              | 16017.2               | 114.2                         | 7282.58                    |
| DD62          | 2.79                      | 2.4               | 33026.32              | 151.3                         | 10797.52                   |
| DD63          | 2.22                      | 3.03              | 23200.19              | 205                           | 7874.27                    |
| DD64          | 2.31                      | 3.1               | 30865.34              | 156.3                         | 4686.17                    |
| DD41          | 2.66                      | 2.47              | 54424                 | 354.8                         | 11280                      |
| DD42          | 2.27                      | 2.34              | 57167.76              | 297.8                         | 15921.77                   |
| DD43          | 2.07                      | 2.48              | 61850.47              | 398.5                         | 14443.72                   |
| DD44          | 2.49                      | 2.56              | 75303.38              | 360.2                         | 14665.47                   |
| DD87          | 2.24                      | 2.38              | 61583.01              | 312.5                         | 16122.55                   |
| DD88          | 2.4                       | 2.61              | 67408.82              | 257                           | 14442.49                   |
| DD109         | 7.3                       | 4.68              | 36445.36              | 164.4                         | 4209.4                     |
| DD110         | 6.27                      | 4.59              | 44739.79              | 146                           | 8329.51                    |
| DD21          | 6.6                       | 4.59              | 57227.65              | 134                           | 5482                       |
| DD22          | 4.52                      | 3.9               | 27886.01              | 134                           | 9895.09                    |
| DD23          | 11.52                     | 4.14              | 69353.79              | 143.2                         | 8363.89                    |
| DD24          | 6.95                      | 3.77              | 40346.32              | 145.1                         | 5989.69                    |
| DD1           | 3.53                      | 2.88              | 55083.55              | 571.3                         | 8334.31                    |
| DD2           | 3.84                      | 2.84              | 61165.3               | 639.8                         | 8231.6                     |
| DD3           | 4.03                      | 2.85              | 75353.58              | 433.5                         | 9963.85                    |
| DD4           | 4.35                      | 3.14              | 106062.87             | 379.3                         | 12183.92                   |
| DD89          | 4.26                      | 3.14              | 65527.23              | 587                           | 12564.06                   |
| DD90          | 3.62                      | 3.03              | 36803.72              | 431.3                         | 5504.45                    |
| DD65          | 7.94                      | 4.49              | 53492.42              | 150                           | 7096.97                    |
| DD66          | 16.75                     | 4.31              | 132614.62             | 188.4                         | 6682.63                    |
| DD67          | 4.6                       | 4.15              | 15715.69              | 138.8                         | 7609.53                    |
| DD68          | 7.17                      | 4.56              | 44387.32              | 164.5                         | 4171.48                    |
| DD69          | 9.03                      | 4.29              | 42052.1               | 141.1                         | 5392.38                    |
| DD70          | 14.61                     | 5.05              | 125737.1              | 151.4                         | 7568.46                    |
| DD45          | 5.62                      | 3.44              | 140379.88             | 194.9                         | 16714.03                   |
| DD46          | 5.83                      | 3.53              | 151640.27             | 343.8                         | 15501.8                    |
| DD47          | 5.27                      | 3.42              | 72149.85              | 661                           | 11310.79                   |
| DD48          | 4.13                      | 3.26              | 37990.61              | 589.1                         | 7344.29                    |
| DD49          | 3.52                      | 3.08              | 38863.77              | 633.5                         | 8223.38                    |
| DD50          | 3.46                      | 3.35              | 37843.95              | 570.1                         | 7763.17                    |
| DD25          | 8.99                      | 4.76              | 50763.46              | 151.5                         | 7924.19                    |
| DD26          | 21.7                      | 5.04              | 171848.84             | 205.9                         | 6068.84                    |
| DD27          | 10.7                      | 4.21              | 83477.6               | 157                           | 7983.7                     |
| DD28          | 13.44                     | 4.67              | 97203.17              | 207                           | 8771.36                    |
| DD29          | 10.24                     | 6.16              | 57911.39              | 156.5                         | 7401.29                    |
| DD30          | 8.27                      | 4.69              | 31372.15              | 175.5                         | 6262.72                    |
| DD10          | 4.3                       | 3.21              | 43216.95              | 594.5                         | 13285.64                   |
| DD5           | 3.83                      | 3.27              | 38064.97              | 528.3                         | 7846.17                    |
| DD6           | 4.55                      | 3.48              | 45150.99              | 648.8                         | 7846.67                    |
| DD7           | 4.12                      | 3.29              | 47853.39              | 515.1                         | 8716.8                     |
| DD8           | 4.17                      | 3.47              | 44285.8               | 568.5                         | 7132.44                    |
| DD9           | 6.56                      | 3.64              | 66433.65              | 545.1                         | 8715.66                    |

**Cont'd Supplementary Table 1: Physiological Measurements on Individual Animals**

| <b>Rat ID</b> | <b>Corticosterone (ng/ml)</b> | <b>HDL (mg/dl)</b> | <b>FFA (mM)</b> | <b>Insulin (ng/ml)</b> | <b>Plasma TG (mg/dl)</b> | <b>Cholesterol (mg/dl)</b> |
|---------------|-------------------------------|--------------------|-----------------|------------------------|--------------------------|----------------------------|
| DD101         | 175.1                         | 40.84              | 0.066           | 0.5                    | 70.66                    | 154                        |
| DD102         | 105.37                        | 30.6               | 0.057           | 2.12                   | 104.3                    | 126.58                     |
| DD103         | 223.91                        | 34.89              | 0.066           | 0.42                   | 50.31                    | 141.07                     |
| DD104         | 162.08                        | 29.15              | 0.073           | 1.81                   | 72.39                    | 128.52                     |
| DD105         | 56.6                          | 9.18               | 0.063           | 0.82                   | 29.97                    | 102.89                     |
| DD106         | 77.91                         | 33.94              | 0.059           | 1.48                   | 56.01                    | 127.51                     |
| DD81          | 612.75                        | 36.69              | 0.07            | 1.5                    | 92.18                    | 113.52                     |
| DD82          | 565.87                        | 39.96              | 0.068           | 2.61                   | 116.88                   | 115.02                     |
| DD83          | 682.76                        | 39.73              | 0.065           | 1.68                   | 72.18                    | 122.34                     |
| DD84          | 491.04                        | 31.95              | 0.071           | 1.17                   | 67.63                    | 125.73                     |
| DD85          | 632.12                        | 42.85              | 0.235           | 0.65                   | 61.81                    | 130.09                     |
| DD86          | 630.39                        | 41.17              | 0.095           | 1.04                   | 72.9                     | 117.89                     |
| DD107         | 237.2                         | 56.17              | 0.062           | 0.97                   | 90.99                    | 154.16                     |
| DD108         | 141.7                         | 46.93              | 0.063           | 4.99                   | 157.16                   | 134.04                     |
| DD61          | 88.02                         | 9.06               | 0.033           | 2.18                   | 25.22                    | 97.52                      |
| DD62          | 113.63                        | 38.28              | 0.098           | 8.51                   | 74.76                    | 125.61                     |
| DD63          | 243.2                         | 40.95              | 0.049           | 1.75                   | 101.09                   | 112.4                      |
| DD64          | 88.45                         | 38.24              | 0.055           | 11.41                  | 103.59                   | 120.53                     |
| DD41          | 289.19                        | 44.47              | 0.052           | 17.08                  | 125.83                   | 141.76                     |
| DD42          | 376.7                         | 48.54              | 0.052           | 9.66                   | 86.8                     | 93.1                       |
| DD43          | 415.42                        | 44.19              | 0.13            | 15.81                  | 115.99                   | 117.7                      |
| DD44          | 336.69                        | 53.39              | 0.099           | 11.02                  | 62.58                    | 155.18                     |
| DD87          | 357.87                        | 57.08              | 0.045           | 10.62                  | 79.81                    | 134.52                     |
| DD88          | 345.5                         | 59.27              | 0.066           | 17.94                  | 86.48                    | 153.32                     |
| DD109         | 56.4                          | 46.83              | 0.069           | 10.76                  | 134.68                   | 124.94                     |
| DD110         | 54.34                         | 48.42              | 0.053           | 6.41                   | 148.08                   | 127.31                     |
| DD21          | 81.41                         | 32.12              | 0.052           | 6.57                   | 171.6                    | 114.55                     |
| DD22          | 306.96                        | 33.86              | 0.092           | 3.21                   | 90.28                    | 98.42                      |
| DD23          | 81.74                         | 36.8               | 0.085           | 8.35                   | 160.57                   | 127.96                     |
| DD24          | 159.01                        | 40.09              | 0.083           | 6.64                   | 104.19                   | 126.8                      |
| DD1           | 264.06                        | 32.5               | 0.069           | 12.15                  | 159.24                   | 116.05                     |
| DD2           | 385.99                        | 45.05              | 0.072           | 4.6                    | 131                      | 113.96                     |
| DD3           | 350.21                        | 46.78              | 0.071           | 8.9                    | 136.93                   | 122.78                     |
| DD4           | 262.37                        | 51.23              | 0.064           | 24.65                  | 245.05                   | 146.68                     |
| DD89          | 224.23                        | 46.65              | 0.096           | 10.42                  | 210.44                   | 145.64                     |
| DD90          | 198.84                        | 5.49               | 0.06            | 6.2                    | 94.51                    | 71.42                      |
| DD65          | 39.25                         | 37.37              | 0.091           | 3.56                   | 119.17                   | 123.37                     |
| DD66          | 156.37                        | 55.84              | 0.059           | 6.3                    | 137.55                   | 154.92                     |
| DD67          | 51.4                          | 29.62              | 0.034           | 3.08                   | 156.91                   | 97.08                      |
| DD68          | 63.3                          | 42.95              | 0.051           | 5.44                   | 138.71                   | 110.07                     |
| DD69          | 65.97                         | 17.32              | 0.075           | 6.04                   | 141.22                   | 122.78                     |
| DD70          | 58.53                         | 40.36              | 0.109           | 13.16                  | 134.78                   | 141.5                      |
| DD45          | 113.69                        | 36.68              | 0.046           | 12.67                  | 126.23                   | 106.09                     |
| DD46          | 218.72                        | 38.53              | 0.043           | 17.19                  | 191.95                   | 107.12                     |
| DD47          | 412.45                        | 44.91              | 0.073           | 5.93                   | 239.84                   | 105.28                     |
| DD48          | 206.35                        | 44.49              | 0.126           | 5.07                   | 164.8                    | 105.34                     |
| DD49          | 287.83                        | 45.09              | 0.067           | 4.09                   | 153.29                   | 108.07                     |
| DD50          | 254.75                        | 44.94              | 0.08            | 4.21                   | 176.88                   | 109.81                     |
| DD25          | 63.34                         | 39.72              | 0.095           | 5.95                   | 68.06                    | 127.41                     |
| DD26          | 111.88                        | 45.93              | 0.078           | 14.65                  | 189.63                   | 152.24                     |
| DD27          | 163.08                        | 36.62              | 0.099           | 4.96                   | 84.85                    | 118.34                     |
| DD28          | 227.7                         | 50.36              | 0.147           | 2.61                   | 175.7                    | 125.06                     |
| DD29          | 150.78                        | 26.53              | 0.081           | 10.18                  | 96.18                    | 92.86                      |
| DD30          | 66.4                          | 40.16              | 0.071           | 5.79                   | 89.21                    | 108.23                     |
| DD10          | 278.52                        | 45.04              | 0.12            | 2.84                   | 211.1                    | 116.95                     |
| DD5           | 224.27                        | 45.71              | 0.122           | 4.02                   | 214.82                   | 113.52                     |
| DD6           | 308.02                        | 53.55              | 0.098           | 5.29                   | 235.03                   | 110.66                     |
| DD7           | 222.5                         | 44.43              | 0.078           | 7.38                   | 147.02                   | 101.79                     |
| DD8           | 183                           | 41.22              | 0.101           | 6.38                   | 149.25                   | 102.37                     |
| DD9           | 204.04                        | 46.04              | 0.102           | 6.41                   | 186.81                   | 115.01                     |

**Cont'd Supplementary Table 1: Physiological Measurements on Individual Animals**

| <b>Rat ID</b> | <b>LDL (mg/dl)</b> | <b>Muscle TG (ug/mg)</b> | <b>Liver TG (ug/mg)</b> |
|---------------|--------------------|--------------------------|-------------------------|
| DD101         | 85.07              | 28.09                    | 9.29                    |
| DD102         | 61.54              | 13.93                    | 9.47                    |
| DD103         | 52.27              | 24                       | 7.65                    |
| DD104         | 39.74              | 17.37                    | 15.99                   |
| DD105         | 40.89              | 16.42                    | 7.8                     |
| DD106         | 52.13              | 18.02                    | 7.8                     |
| DD81          | 42.39              | 11.85                    | 9.97                    |
| DD82          | 47.32              | 13.23                    | 6.62                    |
| DD83          | 56.67              | 15.25                    | 6.42                    |
| DD84          | 59.29              | 17.46                    | 8.3                     |
| DD85          | 60.75              | 22.81                    | 6.96                    |
| DD86          | 57.04              | 10.64                    | 9.02                    |
| DD107         | 49.46              | 7.87                     | 9.03                    |
| DD108         | 37.37              | 5.29                     | 14.2                    |
| DD61          | 32.53              | 7.04                     | 7.09                    |
| DD62          | 34.44              | 9.73                     | 18.21                   |
| DD63          | 28.93              | 6.05                     | 24.77                   |
| DD64          | 33.52              | 7.3                      | 13.92                   |
| DD41          | 49.55              | 13.226                   | 20.7                    |
| DD42          | 48.57              | 9.91                     | 12.49                   |
| DD43          | 31.7               | 15.65                    | 11.93                   |
| DD44          | 79.9               | 10.97                    | 11.41                   |
| DD87          | 53.05              | 7.44                     | 12.31                   |
| DD88          | 45.09              | 12.48                    | 15.97                   |
| DD109         | 40.25              | 2.91                     | 20.33                   |
| DD110         | 63.16              | 4.84                     | 8.37                    |
| DD21          | 66.42              | 5.27                     | 16.74                   |
| DD22          | 75.78              | 15.03                    | 15.67                   |
| DD23          | 45.01              | 9.95                     | 15.76                   |
| DD24          | 59.02              | 4.56                     | 35.24                   |
| DD1           | 56.07              | 6.57                     | 18.14                   |
| DD2           | 40.8               | 9.06                     | 13.91                   |
| DD3           | 32.83              | 7.55                     | 15.68                   |
| DD4           | 37.37              | 9.36                     | 23.33                   |
| DD89          | 51.93              | 7.61                     | 20.1                    |
| DD90          | 42.14              | 6.48                     | 18.63                   |
| DD65          | 64.21              | 7.37                     | 13.29                   |
| DD66          | 74.33              | 6.27                     | 23.81                   |
| DD67          | 45.34              | 2.64                     | 5.41                    |
| DD68          | 58.83              | 2.5                      | 19.23                   |
| DD69          | 41.23              | 2.49                     | 15.51                   |
| DD70          | 62.93              | 12.44                    | 13.74                   |
| DD45          | 55.45              | 7.14                     | 20.02                   |
| DD46          | 40.72              | 11.61                    | 13.82                   |
| DD47          | 33.95              | 7.48                     | 22.19                   |
| DD48          | 38.98              | 5.13                     | 23.02                   |
| DD49          | 52.78              | 7.57                     | 19.65                   |
| DD50          | 43.95              | 6                        | 22.48                   |
| DD25          | 44.23              | 7.48                     | 21.71                   |
| DD26          | 44.63              | 10.44                    | 31.58                   |
| DD27          | 56.68              | 5.28                     | 15.78                   |
| DD28          | 65.37              | 5.92                     | 27.94                   |
| DD29          | 47.1               | 6.64                     | 15.98                   |
| DD30          | 39.89              | 3.04                     | 50.43                   |
| DD10          | 54.82              | 3.49                     | 18.25                   |
| DD5           | 41.05              | 6.03                     | 17.36                   |
| DD6           | 36.91              | 6.43                     | 22.58                   |
| DD7           | 46.54              | 6.36                     | 19.06                   |
| DD8           | 32.31              | 6.5                      | 20.9                    |
| DD9           | 33.51              | 8.67                     | 23.37                   |
