# Supplementary material
Source: PubMed Central journal article supplement (PMC3093670)
Supplement: NIHMS286972-supplement-02.pdf [file NIHMS286972-supplement-02.pdf]

**Supplementary Table 2: Raw Intensities of Individual Differentially Regulated Probe Sets**

| Animal | Strain | Age (Week) | 1399073_at | 1398679_at | 1398635_at | 1398528_at | 1398288_at | 1397745_at | 1397206_at |
|--------|--------|------------|------------|------------|------------|------------|------------|------------|------------|
| DD81   | GK     | 4          | 67.42693   | 87.195786  | 30.906158  | 17.425182  | 28.594278  | 22.321497  | 12.806757  |
| DD84   | GK     | 4          | 66.22561   | 87.0731    | 43.350704  | 1.6908573  | 40.46775   | 26.391876  | 18.725096  |
| DD85   | GK     | 4          | 72.965675  | 95.64581   | 62.58369   | 10.110637  | 42.91979   | 28.379982  | 16.58228   |
| DD86   | GK     | 4          | 81.70421   | 75.5523    | 54.96264   | 10.024694  | 46.9409    | 23.465801  | 15.126225  |
| DD83   | GK     | 4          | 60.764347  | 82.36093   | 35.989037  | 16.819984  | 30.724924  | 26.242432  | 12.143516  |
| DD41   | GK     | 8          | 38.11654   | 96.8428    | 23.641844  | 15.523216  | 9.604649   | 36.090538  | 19.01444   |
| DD42   | GK     | 8          | 66.49188   | 108.18569  | 22.993732  | 14.976913  | 7.324113   | 40.875645  | 12.695267  |
| DD43   | GK     | 8          | 105.08848  | 91.171074  | 38.10065   | 13.295752  | 4.413964   | 9.410747   | 9.072065   |
| DD44   | GK     | 8          | 161.21977  | 97.19274   | 29.36016   | 13.841136  | 2.2723324  | 27.201004  | 17.008415  |
| DD87   | GK     | 8          | 37.41596   | 91.97231   | 38.586365  | 7.729994   | 2.915616   | 28.970444  | 14.482489  |
| DD2    | GK     | 12         | 106.65292  | 83.82889   | 37.68516   | 20.264214  | 2.1167133  | 17.823217  | 17.188503  |
| DD3    | GK     | 12         | 77.57884   | 82.067795  | 34.043602  | 20.943645  | 1.0543435  | 27.321905  | 31.447695  |
| DD89   | GK     | 12         | 105.96456  | 137.273    | 17.377836  | 19.196688  | 2.699442   | 46.49161   | 36.989555  |
| DD90   | GK     | 12         | 83.972336  | 84.380905  | 10.011382  | 25.830236  | 5.7969365  | 23.391888  | 24.332264  |
| DD4    | GK     | 12         | 82.7015    | 98.04837   | 30.551025  | 14.519503  | 8.586781   | 30.174011  | 22.679253  |
| DD47   | GK     | 16         | 112.75828  | 144.1466   | 18.872755  | 18.415888  | 8.086778   | 20.984941  | 19.101377  |
| DD48   | GK     | 16         | 172.45164  | 86.21761   | 29.044909  | 9.945622   | 1.5806581  | 13.034037  | 15.357107  |
| DD49   | GK     | 16         | 17.769886  | 101.57993  | 24.008131  | 19.87701   | 0.6570257  | 24.760902  | 13.232408  |
| DD50   | GK     | 16         | 119.08145  | 117.83061  | 19.635834  | 16.22007   | 1.4207221  | 14.586419  | 19.098614  |
| DD46   | GK     | 16         | 98.45543   | 104.12015  | 44.921684  | 7.177819   | 2.5962586  | 30.927368  | 25.909678  |
| DD6    | GK     | 20         | 39.165676  | 112.91206  | 41.11056   | 11.611044  | 2.4479222  | 22.31768   | 19.326122  |
| DD7    | GK     | 20         | 59.50902   | 100.44299  | 31.322458  | 17.766605  | 2.0638938  | 21.686033  | 20.601034  |
| DD8    | GK     | 20         | 61.173527  | 127.50122  | 28.05204   | 18.764814  | 5.1410728  | 31.060577  | 26.43006   |
| DD5    | GK     | 20         | 94.652626  | 93.38649   | 23.473679  | 16.77607   | 1.7186588  | 17.973978  | 3.6226149  |
| DD9    | GK     | 20         | 52.316853  | 122.33816  | 6.5848484  | 12.669677  | 1.2078724  | 20.0981    | 7.8317275  |
| DD103  | WKY    | 4          | 147.51042  | 31.913996  | 16.975119  | 100.63209  | 51.56688   | 21.31395   | 47.17163   |
| DD101  | WKY    | 4          | 263.30408  | 73.42065   | 30.585852  | 148.75871  | 69.205894  | 30.617449  | 36.499397  |
| DD102  | WKY    | 4          | 296.0494   | 50.687218  | 36.139103  | 92.15419   | 54.141266  | 50.861298  | 42.9115    |
| DD105  | WKY    | 4          | 243.75357  | 26.531979  | 26.956432  | 93.167694  | 83.59216   | 42.335697  | 24.235188  |
| DD106  | WKY    | 4          | 216.94447  | 48.7761    | 17.238508  | 186.96585  | 53.51284   | 51.530724  | 41.380585  |
| DD62   | WKY    | 8          | 271.9045   | 33.202557  | 26.950594  | 70.926056  | 2.4453845  | 10.201337  | 19.366009  |
| DD64   | WKY    | 8          | 253.95317  | 67.14714   | 35.18336   | 162.18768  | 1.4824898  | 5.0994005  | 33.565483  |
| DD107  | WKY    | 8          | 291.4992   | 28.837856  | 25.998455  | 117.49132  | 2.0247989  | 6.7800565  | 33.393913  |
| DD108  | WKY    | 8          | 250.32307  | 65.280365  | 21.110605  | 101.56343  | 3.8369765  | 45.972916  | 22.101997  |
| DD63   | WKY    | 8          | 281.98193  | 70.247284  | 15.661866  | 145.63788  | 2.3652806  | 22.95273   | 34.615707  |
| DD23   | WKY    | 12         | 255.82751  | 31.3903    | 11.136437  | 72.777824  | 7.054502   | 9.642868   | 37.4397    |
| DD24   | WKY    | 12         | 289.38394  | 102.56899  | 34.705788  | 66.14475   | 4.923071   | 20.671032  | 45.100147  |
| DD110  | WKY    | 12         | 362.32162  | 90.278465  | 26.990984  | 141.04988  | 3.8781633  | 15.255988  | 25.968643  |
| DD22   | WKY    | 12         | 376.28592  | 75.48833   | 29.050804  | 115.33852  | 7.430008   | 16.623842  | 34.635834  |
| DD109  | WKY    | 12         | 331.97827  | 35.821438  | 3.2546513  | 124.06043  | 10.53319   | 6.9062824  | 10.52355   |
| DD65   | WKY    | 16         | 155.5164   | 42.425285  | 2.3384516  | 110.2046   | 1.5856096  | 37.34442   | 48.56904   |
| DD66   | WKY    | 16         | 375.1284   | 66.94799   | 13.31072   | 72.72965   | 12.124651  | 16.479443  | 39.002148  |
| DD67   | WKY    | 16         | 245.14577  | 50.111202  | 35.25795   | 225.55566  | 1.9981772  | 15.74476   | 22.708614  |
| DD69   | WKY    | 16         | 315.176    | 56.0084    | 22.77519   | 64.559685  | 11.374878  | 22.108946  | 34.352104  |
| DD68   | WKY    | 16         | 278.54022  | 31.693478  | 13.111751  | 69.42923   | 0.9834402  | 17.78554   | 20.714762  |
| DD25   | WKY    | 20         | 392.2973   | 64.784966  | 5.7852764  | 72.98339   | 14.399579  | 1.1254643  | 45.817318  |
| DD28   | WKY    | 20         | 353.868    | 40.09923   | 2.631998   | 55.275597  | 7.407349   | 8.009956   | 32.27723   |
| DD29   | WKY    | 20         | 325.08884  | 160.79149  | 12.284837  | 77.41286   | 7.370353   | 2.1570601  | 15.587879  |
| DD27   | WKY    | 20         | 474.88675  | 59.667385  | 30.013983  | 15.953496  | 6.9641967  | 13.192168  | 60.362473  |
| DD30   | WKY    | 20         | 136.8299   | 70.08955   | 15.358776  | 100.85127  | 2.592665   | 21.392704  | 22.787758  |

## Cont'd Supplementary Table 2

| Animal | 1397153_at | 1396877_at | 1396743_at | 1396714_at | 1396327_at | 1396240_at | 1396184_at | 1396073_at | 1396067_at |
|--------|------------|------------|------------|------------|------------|------------|------------|------------|------------|
| DD81   | 5.0516005  | 24.65262   | 211.06029  | 82.26033   | 21.203753  | 2.075555   | 17.033102  | 38.04888   | 20.38511   |
| DD84   | 6.7310386  | 18.583462  | 151.7906   | 75.52245   | 12.414582  | 30.057987  | 43.663277  | 49.583267  | 49.091393  |
| DD85   | 34.894794  | 23.233053  | 117.05476  | 69.861015  | 24.63077   | 20.63209   | 18.753555  | 31.612148  | 46.62122   |
| DD86   | 30.510984  | 29.86371   | 95.86881   | 59.923992  | 17.148296  | 31.764538  | 46.449696  | 46.675045  | 57.32673   |
| DD83   | 29.63837   | 16.782951  | 112.01421  | 56.74882   | 14.322537  | 13.930972  | 13.278901  | 48.515495  | 38.27154   |
| DD41   | 18.689623  | 60.847797  | 126.6278   | 62.96858   | 10.837729  | 30.209288  | 28.839376  | 55.242947  | 42.61003   |
| DD42   | 29.202784  | 63.522507  | 123.24148  | 50.464336  | 27.82046   | 18.896667  | 12.004229  | 44.536434  | 44.225586  |
| DD43   | 22.969755  | 52.010918  | 96.968735  | 67.73018   | 18.09527   | 19.755226  | 23.05166   | 46.209373  | 22.337032  |
| DD44   | 32.817257  | 27.862026  | 79.51162   | 53.213573  | 19.048048  | 10.957277  | 18.315935  | 52.405586  | 38.513115  |
| DD87   | 28.172052  | 57.61858   | 121.91332  | 64.183075  | 28.916824  | 38.804783  | 15.360169  | 61.36822   | 30.840183  |
| DD2    | 26.15979   | 50.790512  | 119.34836  | 63.06359   | 4.061727   | 18.266329  | 34.146202  | 69.40233   | 24.648726  |
| DD3    | 36.49221   | 46.935238  | 114.98446  | 79.68905   | 18.540516  | 16.31798   | 15.947175  | 63.386414  | 21.738792  |
| DD89   | 22.073938  | 89.84018   | 136.13953  | 69.6333    | 14.88282   | 5.9855223  | 14.146643  | 78.233154  | 38.817043  |
| DD90   | 18.278154  | 63.04025   | 150.72415  | 65.65256   | 14.160899  | 6.4665647  | 15.619199  | 90.07235   | 42.18376   |
| DD4    | 32.02389   | 46.40596   | 142.63864  | 63.7025    | 17.98658   | 18.97936   | 17.777752  | 78.59096   | 25.704023  |
| DD47   | 20.973078  | 40.972866  | 105.95252  | 48.322975  | 19.841717  | 13.272226  | 20.155535  | 66.14135   | 30.528292  |
| DD48   | 12.160273  | 46.21361   | 101.16055  | 49.618607  | 20.43248   | 4.0290933  | 4.584878   | 33.718357  | 31.350832  |
| DD49   | 33.354492  | 37.1837    | 216.76749  | 61.026665  | 21.316158  | 16.410727  | 4.5542197  | 54.72935   | 18.17209   |
| DD50   | 23.060736  | 89.3954    | 126.86567  | 59.8319    | 16.462896  | 14.923892  | 26.881351  | 61.766777  | 34.673573  |
| DD46   | 23.58517   | 66.12524   | 156.71425  | 86.21392   | 9.471477   | 5.1110296  | 19.579273  | 81.72215   | 23.111498  |
| DD6    | 15.314143  | 47.015827  | 182.75108  | 51.990154  | 22.853657  | 13.526167  | 7.7006     | 81.03161   | 25.729332  |
| DD7    | 9.590906   | 48.762207  | 174.77141  | 74.400116  | 15.933983  | 16.707092  | 15.443887  | 62.89924   | 29.612478  |
| DD8    | 21.043425  | 44.77207   | 219.64465  | 64.04537   | 30.08223   | 22.026033  | 12.480494  | 54.418636  | 33.155804  |
| DD5    | 18.433397  | 40.59211   | 105.44923  | 73.84283   | 16.499935  | 5.079547   | 3.5016098  | 66.193275  | 33.29873   |
| DD9    | 27.67312   | 40.72784   | 214.22025  | 68.456024  | 14.719964  | 24.32327   | 13.315272  | 50.012844  | 44.595615  |
| DD103  | 51.399097  | 86.89073   | 99.508736  | 11.0584    | 56.583805  | 74.47848   | 17.704943  | 23.885145  | 11.247506  |
| DD101  | 44.101963  | 233.6411   | 79.49521   | 7.1057606  | 41.387695  | 70.61531   | 30.668594  | 33.502823  | 12.711141  |
| DD102  | 63.413265  | 117.87876  | 94.94135   | 17.998905  | 47.34752   | 37.681095  | 25.440058  | 43.963287  | 21.010347  |
| DD105  | 53.878143  | 279.97266  | 36.093243  | 12.003377  | 44.6265    | 34.04184   | 24.20956   | 62.996025  | 6.3164763  |
| DD106  | 46.51902   | 444.22156  | 33.169765  | 19.794273  | 27.213825  | 81.556496  | 23.712471  | 42.026314  | 27.23005   |
| DD62   | 31.313257  | 165.94557  | 17.3598    | 3.761404   | 64.90487   | 55.832863  | 62.8032    | 32.825504  | 16.125498  |
| DD64   | 62.431084  | 43.650887  | 67.761986  | 32.790314  | 50.670635  | 82.06354   | 74.5162    | 36.534958  | 17.951683  |
| DD107  | 32.44151   | 121.16015  | 26.246403  | 6.717003   | 5.366942   | 46.55123   | 73.54358   | 29.939083  | 16.074564  |
| DD108  | 26.911388  | 248.35602  | 15.464461  | 9.662288   | 41.137314  | 38.067696  | 83.24711   | 47.84099   | 12.787888  |
| DD63   | 56.333794  | 37.3889    | 96.22854   | 1.5843756  | 39.722057  | 57.459408  | 108.6917   | 36.62789   | 16.298065  |
| DD23   | 37.049294  | 261.77872  | 34.167614  | 7.220358   | 17.202803  | 24.756367  | 50.75029   | 44.172344  | 24.896313  |
| DD24   | 61.21629   | 219.42982  | 24.37022   | 1.4501044  | 38.92981   | 49.53275   | 60.995564  | 53.558113  | 31.844213  |
| DD110  | 41.34727   | 169.53279  | 14.974826  | 14.327337  | 44.974777  | 63.433323  | 84.3129    | 29.244513  | 7.9608955  |
| DD22   | 54.60804   | 130.27052  | 93.26833   | 3.8139336  | 52.019485  | 91.12215   | 107.82841  | 28.266636  | 8.821439   |
| DD109  | 41.267075  | 198.52464  | 46.368526  | 3.270836   | 19.04961   | 4.8933105  | 55.507225  | 19.012596  | 21.372318  |
| DD65   | 42.108887  | 387.10022  | 157.65825  | 4.0961156  | 29.340485  | 88.34841   | 80.8158    | 17.116508  | 17.722801  |
| DD66   | 47.110912  | 182.7301   | 31.444168  | 82.0881    | 44.586597  | 72.17932   | 53.998672  | 28.063711  | 10.431836  |
| DD67   | 37.001163  | 298.68176  | 152.72244  | 8.192531   | 16.62854   | 27.962402  | 49.14875   | 4.9183674  | 14.409362  |
| DD69   | 52.089603  | 58.798435  | 80.946434  | 29.969337  | 26.852728  | 43.12077   | 72.1353    | 36.839622  | 16.362679  |
| DD68   | 50.357586  | 263.9042   | 35.950886  | 35.14921   | 50.259846  | 24.708305  | 91.551346  | 58.696682  | 14.823453  |
| DD25   | 37.185284  | 198.69176  | 25.665327  | 3.529482   | 27.631567  | 32.58626   | 66.2517    | 6.3376737  | 4.577872   |
| DD28   | 38.1124    | 177.6432   | 82.011894  | 41.311222  | 58.89491   | 14.176441  | 48.78262   | 8.58662    | 33.301846  |
| DD29   | 35.42472   | 172.15321  | 138.36133  | 4.9859853  | 17.186197  | 19.329996  | 94.37955   | 9.737295   | 14.125639  |
| DD27   | 59.289036  | 306.78067  | 134.42352  | 27.33017   | 53.252316  | 85.843925  | 56.2565    | 4.9247165  | 15.702377  |
| DD30   | 36.39711   | 295.51938  | 47.14309   | 31.601763  | 76.68725   | 22.763887  | 79.78814   | 18.388493  | 13.734511  |

## Cont'd Supplementary Table 2

| Animal | 1395981_at | 1395829_at | 1395795_at | 1395762_at | 1395680_at | 1395566_at | 1395523_at | 1395361_at | 1395337_at |
|--------|------------|------------|------------|------------|------------|------------|------------|------------|------------|
| DD81   | 2.203266   | 1.8269073  | 9.274285   | 12.278062  | 65.86051   | 0.8199034  | 164.2727   | 22.729881  | 14.485426  |
| DD84   | 6.3347254  | 1.5508972  | 9.454734   | 4.557527   | 94.82144   | 8.532422   | 147.32158  | 18.483864  | 20.725437  |
| DD85   | 1.1950076  | 1.6051519  | 2.9355016  | 14.51042   | 86.54128   | 19.872576  | 129.97182  | 31.667612  | 15.010195  |
| DD86   | 8.693118   | 1.5179667  | 12.8309    | 14.489575  | 92.52732   | 23.17613   | 151.0954   | 16.064669  | 18.21337   |
| DD83   | 13.271812  | 2.0511777  | 13.985598  | 7.5496125  | 71.26616   | 22.279926  | 159.0547   | 6.927623   | 4.822428   |
| DD41   | 24.195892  | 2.7154381  | 40.30356   | 7.8543377  | 103.94353  | 19.251078  | 124.06287  | 21.930864  | 28.88569   |
| DD42   | 12.000441  | 1.5715784  | 25.131178  | 39.909344  | 74.67004   | 25.852728  | 122.83896  | 30.804403  | 21.580273  |
| DD43   | 5.16831    | 1.0444223  | 19.84161   | 4.524307   | 86.207695  | 30.029657  | 171.52722  | 26.42646   | 24.683823  |
| DD44   | 11.023156  | 2.1296046  | 21.297365  | 8.85551    | 95.17148   | 18.493153  | 173.69876  | 12.506323  | 34.936726  |
| DD87   | 9.973734   | 7.406774   | 34.980827  | 19.748022  | 100.50987  | 26.390554  | 144.28947  | 26.14873   | 33.082794  |
| DD2    | 7.3019714  | 3.3458443  | 23.730791  | 8.285062   | 92.39132   | 25.511099  | 111.2674   | 37.360195  | 2.9363532  |
| DD3    | 18.91609   | 1.4513463  | 23.035234  | 19.629961  | 96.03424   | 40.037937  | 127.98648  | 47.244385  | 3.0938673  |
| DD89   | 7.6658964  | 1.4473681  | 60.52827   | 35.269962  | 134.13626  | 23.5234    | 163.5003   | 61.878036  | 3.9278061  |
| DD90   | 17.555859  | 11.885716  | 44.403484  | 38.871902  | 117.77433  | 31.647429  | 129.62207  | 63.036144  | 3.5063322  |
| DD4    | 16.650518  | 3.2381275  | 41.72656   | 36.776184  | 147.18459  | 21.054356  | 159.36412  | 48.412613  | 3.7440858  |
| DD47   | 11.682221  | 1.4029304  | 31.844995  | 11.35289   | 158.82993  | 16.285164  | 164.85356  | 39.938     | 3.3556523  |
| DD48   | 0.7832794  | 4.9002733  | 24.957928  | 3.4826703  | 94.44469   | 21.927134  | 193.58897  | 33.59274   | 38.72592   |
| DD49   | 9.481662   | 3.2198727  | 37.669956  | 33.24738   | 173.79672  | 23.240366  | 140.01735  | 53.604218  | 4.9066525  |
| DD50   | 2.3146207  | 6.06583    | 20.607641  | 7.3420653  | 149.85756  | 8.739507   | 121.73715  | 44.027527  | 20.473478  |
| DD46   | 13.95806   | 5.001299   | 38.745937  | 30.369675  | 130.2219   | 25.564047  | 144.33432  | 63.253654  | 19.059986  |
| DD6    | 6.1937175  | 3.859174   | 23.317326  | 18.943308  | 180.07901  | 16.194622  | 149.54883  | 64.38182   | 3.531393   |
| DD7    | 3.8369787  | 2.8591688  | 36.52658   | 15.509357  | 189.66827  | 7.822133   | 137.44495  | 44.106506  | 3.398112   |
| DD8    | 1.2763755  | 1.9912056  | 20.404613  | 16.97894   | 185.53514  | 26.868252  | 127.67091  | 46.535984  | 11.771722  |
| DD5    | 7.8231936  | 1.8572876  | 14.589482  | 14.518635  | 128.53453  | 14.983743  | 150.21983  | 24.868774  | 27.546852  |
| DD9    | 1.2028601  | 3.7110994  | 34.66747   | 10.003799  | 164.72112  | 11.3934    | 127.28198  | 42.231445  | 1.3788458  |
| DD103  | 6.571537   | 29.767927  | 14.14656   | 87.81659   | 12.775303  | 51.278152  | 70.45991   | 6.9198494  | 27.681147  |
| DD101  | 13.507467  | 33.037464  | 17.622057  | 53.262115  | 43.107067  | 42.25223   | 184.04137  | 21.155708  | 61.471954  |
| DD102  | 7.415201   | 34.44537   | 17.11593   | 106.99987  | 39.85057   | 60.491596  | 83.44613   | 1.7189397  | 68.44997   |
| DD105  | 15.076356  | 17.292776  | 3.116789   | 76.20082   | 41.11495   | 52.469334  | 66.69443   | 16.360975  | 39.668713  |
| DD106  | 11.886185  | 27.065996  | 15.88101   | 93.9622    | 58.938618  | 48.947285  | 84.54557   | 5.367108   | 65.37884   |
| DD62   | 8.21671    | 68.62782   | 5.8496995  | 36.45598   | 122.49171  | 26.769667  | 76.8592    | 1.6450595  | 25.98964   |
| DD64   | 14.346278  | 73.72167   | 9.380899   | 35.144367  | 64.95924   | 25.78061   | 73.87485   | 30.817825  | 32.605072  |
| DD107  | 0.6430568  | 75.942     | 8.825384   | 55.199955  | 58.25745   | 29.820248  | 130.01112  | 2.5654252  | 31.14494   |
| DD108  | 10.757389  | 86.68516   | 5.4738603  | 39.35425   | 60.325085  | 38.659622  | 66.2165    | 1.4132156  | 40.866684  |
| DD63   | 17.041363  | 99.29224   | 10.488314  | 52.61768   | 29.73122   | 21.723652  | 61.309395  | 3.7120237  | 33.70223   |
| DD23   | 7.6127753  | 75.62817   | 10.031205  | 48.39045   | 114.88829  | 36.53209   | 150.3614   | 19.639126  | 2.9625075  |
| DD24   | 21.86526   | 121.15042  | 11.860535  | 70.415634  | 93.89177   | 28.573046  | 76.42954   | 3.484165   | 9.898596   |
| DD110  | 11.337136  | 124.04238  | 1.4176692  | 16.479172  | 77.18079   | 11.324633  | 58.473934  | 11.602251  | 7.1301837  |
| DD22   | 19.111115  | 87.355515  | 1.5960612  | 47.01156   | 58.237495  | 31.445343  | 142.07773  | 11.889895  | 26.132908  |
| DD109  | 6.0071254  | 95.70152   | 19.622168  | 36.03862   | 73.891975  | 39.090446  | 59.713474  | 6.423372   | 11.571287  |
| DD65   | 13.573297  | 145.88559  | 9.504344   | 73.71864   | 79.01093   | 38.952442  | 65.77017   | 4.2080803  | 1.7823809  |
| DD66   | 5.2276163  | 153.16383  | 15.674315  | 31.75986   | 66.67273   | 27.313995  | 63.05166   | 14.223743  | 3.1576903  |
| DD67   | 10.225057  | 73.318695  | 4.8092146  | 37.954964  | 172.36649  | 38.919605  | 56.684574  | 2.4946487  | 44.295593  |
| DD69   | 14.943347  | 152.35631  | 2.1774147  | 52.256996  | 82.47711   | 44.082092  | 54.72721   | 12.90427   | 10.106033  |
| DD68   | 9.660781   | 124.60214  | 15.200867  | 45.890755  | 30.696758  | 22.1365    | 57.607784  | 0.9661039  | 9.806181   |
| DD25   | 19.695395  | 117.2696   | 2.3135505  | 33.43263   | 20.07003   | 23.421562  | 64.94457   | 29.476706  | 19.88962   |
| DD28   | 15.381036  | 116.96217  | 1.8583437  | 31.79203   | 83.55564   | 54.551296  | 60.982967  | 13.464676  | 5.5589223  |
| DD29   | 14.474537  | 114.01171  | 14.280802  | 36.156967  | 36.22879   | 32.947563  | 75.35732   | 0.7499659  | 8.31174    |
| DD27   | 17.229185  | 110.5081   | 9.292259   | 53.549328  | 95.33658   | 30.114246  | 67.86904   | 57.611996  | 11.922071  |
| DD30   | 11.334174  | 203.9561   | 13.258609  | 48.844673  | 94.72315   | 34.465645  | 71.13117   | 1.1247778  | 10.977972  |

## Cont'd Supplementary Table 2

| Animal | 1395260_at | 1395190_at | 1395112_at | 1395073_at | 1395030_at | 1395020_at | 1395014_at | 1394876_at | 1394846_at |
|--------|------------|------------|------------|------------|------------|------------|------------|------------|------------|
| DD81   | 58.532703  | 128.83139  | 23.331993  | 10.544884  | 120.40263  | 6.72748    | 196.45328  | 4.471708   | 14.334497  |
| DD84   | 42.505714  | 118.07426  | 15.702286  | 12.063393  | 213.74199  | 16.585817  | 216.51892  | 1.2868987  | 8.399051   |
| DD85   | 3.3256521  | 112.06988  | 26.792252  | 3.118249   | 126.46059  | 8.198278   | 200.1753   | 6.5101757  | 9.600007   |
| DD86   | 80.00407   | 142.21944  | 25.817043  | 1.3788954  | 147.1932   | 10.068502  | 192.21283  | 3.27568    | 7.6624317  |
| DD83   | 56.61882   | 133.34894  | 23.32681   | 3.2309823  | 185.7108   | 14.15834   | 165.48753  | 6.301128   | 10.585183  |
| DD41   | 30.733295  | 157.90022  | 36.649406  | 29.097284  | 76.13402   | 3.872759   | 156.96642  | 102.98735  | 9.167251   |
| DD42   | 47.545322  | 161.70647  | 51.437386  | 12.964547  | 78.1827    | 13.183611  | 184.15887  | 72.48525   | 0.872265   |
| DD43   | 55.55886   | 153.71584  | 57.349506  | 19.976288  | 101.48167  | 2.3378146  | 111.25454  | 26.668201  | 10.341353  |
| DD44   | 52.370884  | 136.1489   | 52.424034  | 1.199464   | 90.11831   | 8.014619   | 123.35632  | 4.670794   | 11.489822  |
| DD87   | 72.94929   | 147.51718  | 44.119507  | 8.79885    | 104.19421  | 8.13286    | 145.59192  | 109.58556  | 11.84612   |
| DD2    | 110.77666  | 115.34613  | 62.838234  | 4.075834   | 173.22603  | 4.137827   | 138.14977  | 5.334531   | 4.9326367  |
| DD3    | 66.29774   | 79.99305   | 47.325153  | 10.906116  | 123.10172  | 2.7932127  | 142.72418  | 78.18595   | 3.1178334  |
| DD89   | 71.89241   | 114.15565  | 55.671085  | 6.263294   | 106.27655  | 13.344872  | 130.71231  | 108.6298   | 2.341893   |
| DD90   | 69.76971   | 108.85914  | 68.35536   | 7.052421   | 60.9924    | 1.0008744  | 143.30843  | 111.945    | 8.835904   |
| DD4    | 82.70339   | 86.55982   | 69.04446   | 4.377577   | 129.24164  | 8.742479   | 132.42627  | 106.75079  | 4.183778   |
| DD47   | 62.32288   | 105.98522  | 66.966125  | 11.150219  | 104.31567  | 17.94113   | 183.52977  | 100.79299  | 5.0500326  |
| DD48   | 56.15757   | 166.37035  | 75.09889   | 3.579437   | 150.18611  | 1.1227684  | 65.08804   | 8.13539    | 9.337548   |
| DD49   | 10.594513  | 98.01105   | 84.54143   | 7.5054545  | 65.71159   | 1.2334261  | 125.88064  | 103.3048   | 3.350508   |
| DD50   | 89.48876   | 141.27876  | 77.92855   | 3.7098217  | 168.02975  | 7.3126535  | 136.35225  | 38.243385  | 0.895972   |
| DD46   | 102.91846  | 99.48636   | 71.807076  | 9.013184   | 78.17408   | 1.7234979  | 119.89147  | 49.67854   | 17.954802  |
| DD6    | 90.40388   | 104.43008  | 86.542046  | 2.3332002  | 60.031303  | 1.8088942  | 111.75505  | 6.3703117  | 1.3432713  |
| DD7    | 36.38742   | 96.38671   | 61.23918   | 6.459224   | 73.558754  | 2.4931169  | 124.83733  | 24.989237  | 1.1538644  |
| DD8    | 75.93129   | 78.949875  | 82.30161   | 8.060303   | 69.8413    | 0.9315172  | 135.72156  | 20.659767  | 8.320121   |
| DD5    | 122.51576  | 113.72574  | 85.65495   | 3.9908636  | 86.65331   | 9.952349   | 94.858604  | 29.81043   | 8.948244   |
| DD9    | 119.10461  | 74.8454    | 69.84013   | 9.830244   | 60.329483  | 0.9021287  | 135.77187  | 33.527573  | 1.8894999  |
| DD103  | 141.08815  | 23.556936  | 212.78944  | 58.90855   | 47.362865  | 24.50892   | 292.5118   | 33.830788  | 24.798178  |
| DD101  | 164.5745   | 28.185898  | 184.97588  | 33.48655   | 31.13743   | 28.564552  | 261.3375   | 32.299217  | 10.419255  |
| DD102  | 184.55116  | 22.523125  | 137.73016  | 48.828636  | 44.60914   | 11.115854  | 282.10776  | 54.224365  | 47.88444   |
| DD105  | 152.6813   | 12.641615  | 129.92044  | 29.96713   | 39.474632  | 18.04863   | 274.19662  | 33.74036   | 42.79626   |
| DD106  | 153.52711  | 31.517233  | 163.78697  | 46.124035  | 24.931337  | 15.834645  | 296.4616   | 55.494633  | 42.239277  |
| DD62   | 160.59563  | 43.298016  | 251.88193  | 13.5671    | 41.459076  | 11.188102  | 320.45264  | 21.47658   | 27.169872  |
| DD64   | 133.73166  | 33.895813  | 340.0214   | 21.092176  | 36.824497  | 23.692629  | 274.53333  | 8.898511   | 16.85684   |
| DD107  | 140.20572  | 44.546505  | 368.11664  | 53.936497  | 25.582329  | 23.411865  | 336.5115   | 81.99741   | 24.217308  |
| DD108  | 178.66148  | 27.04622   | 228.19315  | 42.943073  | 39.13588   | 23.106108  | 402.1105   | 57.675373  | 45.165833  |
| DD63   | 201.96841  | 24.169935  | 293.19296  | 32.526604  | 26.07069   | 21.802135  | 298.89478  | 20.704914  | 47.55977   |
| DD23   | 202.64331  | 40.46161   | 641.4978   | 33.15526   | 68.69545   | 2.8612728  | 345.04907  | 96.01683   | 33.81355   |
| DD24   | 116.87352  | 51.70984   | 551.40814  | 43.681965  | 53.42896   | 20.14347   | 326.86     | 98.10061   | 24.409986  |
| DD110  | 239.86298  | 68.96952   | 524.7901   | 12.858802  | 63.550694  | 12.552957  | 310.79495  | 5.2167     | 2.2795968  |
| DD22   | 187.8163   | 39.875168  | 547.61957  | 24.431526  | 13.577379  | 7.7413144  | 247.94035  | 63.145897  | 37.35605   |
| DD109  | 134.41748  | 16.678925  | 674.19116  | 41.72505   | 9.66953    | 10.183004  | 214.7973   | 53.681618  | 26.931923  |
| DD65   | 170.37352  | 41.116657  | 744.24054  | 48.09307   | 2.8214111  | 17.655006  | 352.12106  | 61.82272   | 50.59228   |
| DD66   | 133.91212  | 41.00498   | 529.26996  | 38.117634  | 36.30364   | 21.946325  | 425.22992  | 39.276863  | 14.997582  |
| DD67   | 255.09724  | 51.262733  | 830.7291   | 26.312616  | 47.202156  | 9.180632   | 283.87268  | 5.712728   | 18.778032  |
| DD69   | 99.21836   | 52.779804  | 625.596    | 31.667013  | 48.02814   | 11.205071  | 371.9568   | 34.257988  | 20.819967  |
| DD68   | 168.21635  | 53.19725   | 515.10913  | 27.462814  | 16.069725  | 2.2488058  | 415.30548  | 4.747684   | 2.4517827  |
| DD25   | 224.87321  | 33.61096   | 587.3831   | 13.925037  | 18.96759   | 3.331833   | 520.5102   | 6.3712273  | 45.258823  |
| DD28   | 126.13055  | 20.62541   | 513.07874  | 27.597998  | 38.669216  | 13.164383  | 435.97583  | 104.53738  | 30.121168  |
| DD29   | 142.47809  | 39.494877  | 582.86786  | 29.04266   | 29.393166  | 15.045613  | 487.97424  | 99.095695  | 21.728207  |
| DD27   | 103.78373  | 37.755432  | 611.3072   | 22.301245  | 19.43819   | 4.34894    | 404.92947  | 83.19373   | 5.9881063  |
| DD30   | 134.50403  | 20.993267  | 444.00797  | 38.6114    | 26.988697  | 9.909653   | 460.7547   | 111.05571  | 32.137665  |

## Cont'd Supplementary Table 2

| Animal | 1394839_at | 1394756_at | 1394689_at | 1394620_at | 1394574_at | 1394490_at | 1394459_at | 1394264_at | 1393952_at |
|--------|------------|------------|------------|------------|------------|------------|------------|------------|------------|
| DD81   | 46.85812   | 12.135091  | 265.59995  | 11.752227  | 25.853367  | 31.538986  | 146.99785  | 39.508     | 2.7182605  |
| DD84   | 48.929535  | 1.4848092  | 312.4737   | 9.140329   | 52.47279   | 40.496742  | 167.36284  | 39.90166   | 0.5780053  |
| DD85   | 34.235477  | 3.0050247  | 254.94832  | 10.461499  | 58.22504   | 30.117409  | 154.80116  | 32.798397  | 1.0681114  |
| DD86   | 51.64431   | 0.2823037  | 269.7977   | 21.616787  | 33.090324  | 34.33215   | 153.79985  | 42.378666  | 6.578615   |
| DD83   | 38.336884  | 1.0657941  | 234.63148  | 12.502784  | 17.527958  | 37.469364  | 158.5906   | 43.467953  | 2.7678802  |
| DD41   | 34.34548   | 34.866634  | 227.34285  | 21.180716  | 31.070507  | 49.56322   | 183.0034   | 49.78531   | 4.460741   |
| DD42   | 26.153376  | 36.07711   | 158.6482   | 12.801185  | 42.94336   | 46.536106  | 147.40689  | 49.94409   | 0.6041493  |
| DD43   | 39.946304  | 19.544405  | 188.24925  | 6.3466225  | 38.28632   | 49.781307  | 105.95261  | 49.120365  | 1.1879083  |
| DD44   | 34.29563   | 10.573018  | 204.3987   | 24.860622  | 28.541964  | 30.602882  | 124.14692  | 62.740356  | 2.9922645  |
| DD87   | 53.017338  | 36.726807  | 201.11981  | 14.309925  | 25.198492  | 57.045464  | 147.1203   | 56.247185  | 0.9511873  |
| DD2    | 33.227833  | 8.401778   | 181.93837  | 15.998327  | 43.011925  | 38.703346  | 187.00433  | 61.04635   | 6.195503   |
| DD3    | 30.63711   | 23.466309  | 178.98793  | 19.152573  | 42.88294   | 47.734478  | 196.17598  | 58.519226  | 8.889494   |
| DD89   | 24.45443   | 42.639816  | 162.76733  | 3.8738415  | 45.972523  | 58.128822  | 203.94821  | 56.181946  | 2.6366785  |
| DD90   | 54.63885   | 54.920776  | 161.55823  | 17.826822  | 49.531525  | 65.15188   | 217.10936  | 56.546406  | 1.1835402  |
| DD4    | 38.522697  | 28.313183  | 213.79591  | 4.9520555  | 48.684017  | 44.921722  | 203.4917   | 42.39544   | 8.514972   |
| DD47   | 35.21981   | 15.70006   | 148.14102  | 6.974501   | 63.363934  | 47.57168   | 207.99274  | 33.78996   | 3.906307   |
| DD48   | 21.608223  | 6.602934   | 177.97552  | 7.025223   | 35.176987  | 25.082476  | 94.918976  | 54.827377  | 11.420457  |
| DD49   | 46.30819   | 46.76968   | 146.95389  | 7.8659554  | 58.97517   | 69.23569   | 292.51276  | 44.493217  | 6.1254077  |
| DD50   | 20.545204  | 18.713753  | 202.36256  | 18.666466  | 59.964523  | 35.30649   | 217.61139  | 64.99174   | 5.4429693  |
| DD46   | 30.212856  | 17.634039  | 158.384    | 11.716843  | 49.8408    | 49.63475   | 191.73242  | 40.671402  | 9.787485   |
| DD6    | 26.307404  | 29.352758  | 93.9117    | 8.695566   | 54.770878  | 49.301357  | 216.31326  | 63.06596   | 0.7373404  |
| DD7    | 39.891136  | 28.500816  | 107.90088  | 19.48404   | 44.617367  | 44.703114  | 204.78394  | 41.622185  | 4.6850204  |
| DD8    | 27.688711  | 25.692066  | 154.19112  | 17.59442   | 66.35537   | 55.117813  | 217.80785  | 37.71335   | 6.0722866  |
| DD5    | 24.496359  | 12.694844  | 186.57967  | 5.345402   | 41.579163  | 46.12881   | 120.80258  | 43.96188   | 1.19129    |
| DD9    | 27.480394  | 19.111387  | 114.2165   | 11.190681  | 47.40523   | 37.110027  | 220.70348  | 47.77507   | 8.663443   |
| DD103  | 2.5445557  | 150.31807  | 131.49619  | 33.639374  | 31.87122   | 18.703108  | 98.895966  | 14.393305  | 15.203511  |
| DD101  | 14.96111   | 137.3027   | 108.05981  | 50.962456  | 34.213455  | 27.151608  | 66.336     | 16.829016  | 14.644953  |
| DD102  | 10.275345  | 142.69217  | 147.56752  | 32.636726  | 22.526571  | 34.856358  | 80.33981   | 8.756626   | 14.524491  |
| DD105  | 8.183711   | 146.98428  | 146.6196   | 40.315407  | 38.60539   | 16.271929  | 78.96273   | 23.847292  | 9.608673   |
| DD106  | 7.383682   | 163.47989  | 150.18349  | 10.810269  | 40.165775  | 19.239868  | 80.03116   | 7.0653405  | 5.820802   |
| DD62   | 28.887766  | 67.972305  | 112.54004  | 4.141038   | 47.30295   | 17.090221  | 46.376587  | 23.602707  | 10.338476  |
| DD64   | 4.80139    | 39.54755   | 141.84708  | 42.91435   | 49.247967  | 10.60243   | 69.0752    | 3.606398   | 10.747246  |
| DD107  | 40.148487  | 88.60908   | 176.9921   | 15.594955  | 35.155792  | 28.591223  | 81.19185   | 23.40976   | 7.294484   |
| DD108  | 16.340918  | 98.55528   | 53.015244  | 42.923687  | 30.113085  | 14.690024  | 67.406555  | 35.645092  | 16.692142  |
| DD63   | 14.109717  | 84.32397   | 41.616245  | 48.653366  | 41.644794  | 11.81597   | 72.86972   | 21.59673   | 22.73342   |
| DD23   | 2.049115   | 70.14052   | 136.1376   | 14.408427  | 21.658606  | 21.164967  | 50.172104  | 6.2254643  | 21.271782  |
| DD24   | 23.361166  | 56.905876  | 90.55032   | 35.586758  | 16.49184   | 32.967552  | 72.40483   | 18.562977  | 4.1322174  |
| DD110  | 1.9746284  | 63.71776   | 16.135557  | 37.87581   | 20.520456  | 15.843321  | 77.452896  | 9.44035    | 17.569862  |
| DD22   | 17.25779   | 65.42723   | 41.974464  | 28.500427  | 12.678465  | 16.328531  | 58.042007  | 10.76085   | 13.814356  |
| DD109  | 2.3393302  | 52.350204  | 28.571808  | 5.39083    | 46.07886   | 19.102013  | 58.06817   | 12.84298   | 7.150089   |
| DD65   | 1.4679743  | 64.262924  | 113.66407  | 4.0221915  | 31.624489  | 24.68331   | 65.80092   | 3.4166129  | 0.8564236  |
| DD66   | 31.088125  | 37.16342   | 164.19171  | 79.09831   | 25.887873  | 23.120045  | 81.133446  | 15.452062  | 9.2039995  |
| DD67   | 19.320421  | 69.08796   | 27.05906   | 9.953022   | 32.01524   | 17.338636  | 85.22426   | 35.50811   | 7.950688   |
| DD69   | 16.153904  | 51.92728   | 157.3021   | 34.60578   | 18.376461  | 30.7275    | 74.51396   | 6.757998   | 8.911348   |
| DD68   | 1.9222195  | 82.4215    | 68.028015  | 32.102673  | 24.844742  | 23.9612    | 79.156105  | 12.553879  | 28.058144  |
| DD25   | 6.521373   | 82.458954  | 78.38717   | 41.099285  | 41.32294   | 25.581661  | 65.7791    | 28.870892  | 29.733454  |
| DD28   | 20.814932  | 72.29312   | 98.37648   | 45.527378  | 26.811497  | 23.834518  | 65.41371   | 9.966958   | 6.801078   |
| DD29   | 7.6032796  | 81.69485   | 61.766056  | 53.389507  | 22.411411  | 32.52145   | 66.72863   | 15.237944  | 17.735342  |
| DD27   | 6.609094   | 41.671505  | 48.581917  | 29.821182  | 10.866756  | 20.341105  | 50.629772  | 20.334333  | 14.749029  |
| DD30   | 18.056442  | 91.75211   | 54.28807   | 41.59472   | 28.74938   | 30.498936  | 60.60746   | 9.370618   | 45.189564  |

## Cont'd Supplementary Table 2

| Animal | 1393916_at | 1393842_at | 1393718_at | 1393705_at | 1393617_at | 1393585_at | 1393476_at | 1393421_at | 1393387_at |
|--------|------------|------------|------------|------------|------------|------------|------------|------------|------------|
| DD81   | 26.195429  | 114.39602  | 39.037815  | 74.48664   | 21.74914   | 63.936806  | 105.40963  | 109.34342  | 42.372684  |
| DD84   | 23.08027   | 98.62136   | 41.260532  | 70.9613    | 19.880249  | 74.081764  | 86.21915   | 97.48856   | 42.633373  |
| DD85   | 23.16675   | 99.625916  | 59.700954  | 82.149475  | 2.478259   | 82.69538   | 89.66726   | 66.420074  | 43.28682   |
| DD86   | 26.253954  | 129.21204  | 53.899097  | 79.83193   | 11.371831  | 72.67642   | 97.26928   | 94.73565   | 39.60226   |
| DD83   | 16.568129  | 114.05288  | 46.752117  | 67.42299   | 18.62989   | 71.348854  | 93.69589   | 96.1836    | 53.05521   |
| DD41   | 41.171146  | 150.69453  | 41.8455    | 111.91364  | 13.578945  | 146.37312  | 99.097084  | 85.04356   | 67.63967   |
| DD42   | 21.14703   | 122.28847  | 24.381504  | 85.7597    | 14.681758  | 159.33623  | 83.44879   | 87.37454   | 90.61519   |
| DD43   | 26.58456   | 166.38765  | 112.01829  | 100.66425  | 19.397953  | 185.07742  | 113.43842  | 99.26708   | 50.838802  |
| DD44   | 27.058485  | 146.1766   | 71.18019   | 84.76269   | 20.974363  | 143.31502  | 84.537155  | 82.773155  | 60.934185  |
| DD87   | 30.802603  | 118.04235  | 46.742702  | 69.91418   | 17.812649  | 122.61289  | 109.31645  | 90.77794   | 76.2964    |
| DD2    | 21.220808  | 110.13798  | 65.41836   | 26.2927    | 29.96948   | 98.47961   | 146.06386  | 97.9659    | 47.78364   |
| DD3    | 42.46225   | 109.8562   | 122.60378  | 44.683376  | 41.65944   | 170.76624  | 107.43795  | 84.51037   | 76.47641   |
| DD89   | 42.16727   | 93.83126   | 122.56326  | 69.56305   | 24.007498  | 258.2707   | 121.47325  | 84.6083    | 54.824207  |
| DD90   | 42.576485  | 119.54595  | 99.6189    | 69.237305  | 38.07317   | 180.5372   | 95.75297   | 94.194305  | 71.04714   |
| DD4    | 36.62986   | 91.0943    | 97.19598   | 58.06745   | 34.670597  | 163.54915  | 96.381004  | 98.52216   | 57.46088   |
| DD47   | 48.079815  | 91.872345  | 84.55953   | 19.851542  | 46.254944  | 98.59074   | 160.68784  | 87.8281    | 58.349415  |
| DD48   | 22.646004  | 168.06758  | 88.95221   | 80.095085  | 34.575867  | 176.75337  | 78.586205  | 136.68571  | 32.48249   |
| DD49   | 37.706608  | 105.51449  | 41.988102  | 37.861576  | 57.33438   | 63.391125  | 101.89938  | 62.94452   | 42.51297   |
| DD50   | 45.60181   | 100.01642  | 101.00496  | 44.158863  | 34.733944  | 150.51802  | 87.51286   | 86.8149    | 33.69094   |
| DD46   | 42.39818   | 125.5324   | 138.68433  | 38.384895  | 40.454933  | 182.31982  | 108.36084  | 84.36922   | 34.001007  |
| DD6    | 56.675694  | 87.22402   | 54.30839   | 38.31162   | 57.40108   | 131.16913  | 79.693085  | 79.010475  | 76.4473    |
| DD7    | 46.066544  | 79.55732   | 75.13768   | 33.958633  | 48.19237   | 141.91011  | 136.31401  | 89.78762   | 49.85011   |
| DD8    | 47.414677  | 103.01849  | 73.4699    | 28.357891  | 55.197758  | 128.47081  | 91.33274   | 72.89197   | 68.07547   |
| DD5    | 33.500923  | 150.46152  | 146.21077  | 79.95563   | 37.109146  | 196.18112  | 76.56951   | 98.10547   | 52.686325  |
| DD9    | 35.235287  | 87.37527   | 46.325737  | 29.332594  | 63.665646  | 88.503784  | 125.48477  | 76.80376   | 57.95703   |
| DD103  | 23.474642  | 35.987076  | 26.876965  | 223.37863  | 16.65179   | 516.5805   | 26.170898  | 33.96347   | 50.42136   |
| DD101  | 20.305399  | 143.57529  | 29.321396  | 201.50557  | 8.263531   | 463.79184  | 30.068024  | 16.46301   | 25.090591  |
| DD102  | 15.000937  | 42.628254  | 55.13143   | 201.99915  | 5.9444113  | 574.3062   | 16.321821  | 21.36099   | 34.17056   |
| DD105  | 17.913729  | 30.711084  | 65.094185  | 167.48303  | 14.457434  | 522.8142   | 43.883312  | 33.787086  | 14.302176  |
| DD106  | 10.084358  | 157.77466  | 30.789968  | 202.12654  | 7.9092355  | 737.75336  | 36.43694   | 25.994284  | 48.418808  |
| DD62   | 12.040117  | 98.101814  | 53.728905  | 129.24033  | 5.997768   | 254.86967  | 23.34039   | 27.190165  | 30.010475  |
| DD64   | 12.981488  | 105.7819   | 24.109121  | 104.79741  | 21.903008  | 168.42093  | 34.695484  | 29.253462  | 40.03447   |
| DD107  | 20.52497   | 27.064507  | 21.893925  | 119.39009  | 1.7445377  | 489.4852   | 7.965552   | 32.77709   | 33.07298   |
| DD108  | 16.148727  | 29.083607  | 0.5625362  | 118.48772  | 1.3712767  | 385.83078  | 6.8738475  | 19.994007  | 42.098267  |
| DD63   | 10.385223  | 36.46377   | 26.747805  | 115.39748  | 1.9529561  | 350.57544  | 24.683403  | 26.248941  | 30.736538  |
| DD23   | 36.019283  | 57.760166  | 95.64049   | 150.02682  | 1.0696001  | 402.41666  | 24.156807  | 39.897873  | 32.38872   |
| DD24   | 23.03934   | 106.08074  | 28.522179  | 207.73447  | 28.967411  | 594.6673   | 24.984945  | 29.755346  | 32.166576  |
| DD110  | 10.394574  | 115.27965  | 15.434618  | 101.87849  | 21.900995  | 343.49686  | 40.779083  | 43.194557  | 23.51451   |
| DD22   | 11.077778  | 115.87832  | 52.295654  | 98.16404   | 11.751406  | 294.96063  | 17.125074  | 41.322346  | 15.027327  |
| DD109  | 3.6584656  | 78.82992   | 46.224186  | 100.64407  | 26.572996  | 257.68768  | 42.62906   | 8.4256735  | 37.066612  |
| DD65   | 19.744108  | 52.80906   | 58.027317  | 162.037    | 25.866856  | 376.43088  | 26.449286  | 20.166763  | 39.498405  |
| DD66   | 14.011279  | 74.70274   | 50.30201   | 140.91335  | 29.045977  | 646.3842   | 7.86796    | 31.059317  | 35.34738   |
| DD67   | 1.8304859  | 90.39826   | 34.225983  | 84.6172    | 22.452435  | 281.41818  | 44.57508   | 45.172295  | 24.448866  |
| DD69   | 17.981478  | 33.50665   | 158.19978  | 139.20387  | 37.33912   | 309.72876  | 9.993868   | 40.213932  | 34.473534  |
| DD68   | 13.517734  | 16.464365  | 74.32533   | 105.51707  | 21.193031  | 150.08658  | 17.43097   | 23.29031   | 19.683163  |
| DD25   | 23.475815  | 52.18047   | 38.89381   | 41.884987  | 24.644226  | 129.57295  | 25.585424  | 9.4380245  | 7.292742   |
| DD28   | 16.255339  | 42.369335  | 22.88617   | 84.78773   | 33.797028  | 271.11368  | 7.846039   | 34.280006  | 17.291565  |
| DD29   | 15.759437  | 59.12486   | 23.361074  | 98.13753   | 18.003458  | 315.01428  | 24.672274  | 24.390553  | 22.539211  |
| DD27   | 7.599491   | 66.382774  | 50.217476  | 72.81294   | 31.023796  | 101.60338  | 11.188469  | 10.466401  | 42.251984  |
| DD30   | 25.82549   | 36.16977   | 4.667649   | 119.13987  | 22.928743  | 94.339165  | 14.949568  | 24.914705  | 22.574791  |

## Cont'd Supplementary Table 2

| Animal | 1393259_at | 1393169_at | 1393139_at | 1393108_at | 1393075_at | 1392961_at | 1392954_at | 1392860_at | 1392788_at |
|--------|------------|------------|------------|------------|------------|------------|------------|------------|------------|
| DD81   | 121.6009   | 715.53174  | 6.014912   | 23.503836  | 33.68268   | 462.2118   | 17.450075  | 2.063632   | 20.125393  |
| DD84   | 140.60887  | 702.0421   | 1.3645931  | 12.066607  | 16.500992  | 537.79065  | 2.388622   | 8.531143   | 11.278392  |
| DD85   | 140.8339   | 671.45245  | 2.212394   | 16.413265  | 12.391706  | 599.3585   | 4.848697   | 13.447294  | 10.944554  |
| DD86   | 113.91289  | 651.15234  | 1.7827544  | 8.991839   | 14.237222  | 541.34064  | 25.02504   | 3.8004706  | 12.843295  |
| DD83   | 117.21601  | 722.0362   | 1.7691866  | 26.328798  | 16.800438  | 470.81064  | 24.127499  | 15.297961  | 26.394197  |
| DD41   | 129.76804  | 817.4982   | 0.3963144  | 19.878798  | 24.696335  | 560.772    | 17.216337  | 21.138613  | 22.07328   |
| DD42   | 143.4352   | 783.9853   | 17.729057  | 8.515123   | 15.456309  | 530.79895  | 5.4164424  | 1.4667326  | 20.529575  |
| DD43   | 108.47735  | 827.0051   | 10.366846  | 4.251421   | 44.470146  | 330.03516  | 12.844256  | 14.438071  | 16.829382  |
| DD44   | 132.73701  | 841.0645   | 8.034011   | 13.487898  | 32.784485  | 456.6634   | 10.151362  | 13.08624   | 13.28496   |
| DD87   | 139.12257  | 744.59125  | 1.0055171  | 21.164816  | 14.544451  | 516.9686   | 2.7023733  | 17.95299   | 16.539892  |
| DD2    | 115.77158  | 455.1614   | 2.4365416  | 20.091125  | 71.27016   | 412.2964   | 34.164295  | 14.662748  | 17.470333  |
| DD3    | 89.708496  | 499.67682  | 0.7169384  | 14.256743  | 78.44291   | 341.13864  | 22.991163  | 12.272384  | 21.903563  |
| DD89   | 117.94807  | 579.88184  | 1.2122122  | 7.942349   | 74.89639   | 342.73462  | 3.8560152  | 10.64088   | 17.208235  |
| DD90   | 110.22823  | 546.55884  | 1.2404593  | 28.614357  | 91.14387   | 347.9415   | 18.201544  | 13.040712  | 35.61034   |
| DD4    | 98.34567   | 524.9279   | 19.031824  | 8.610139   | 91.7654    | 382.13916  | 5.894218   | 17.174387  | 24.142904  |
| DD47   | 125.97074  | 517.3781   | 3.9583707  | 11.377547  | 87.45364   | 354.96085  | 3.1609838  | 11.796205  | 22.850185  |
| DD48   | 54.24404   | 610.7453   | 7.163177   | 15.936709  | 82.25566   | 181.58899  | 10.28701   | 11.803473  | 29.702559  |
| DD49   | 135.58162  | 610.0914   | 15.547503  | 14.492111  | 81.8947    | 329.5764   | 22.885641  | 19.140915  | 22.056742  |
| DD50   | 150.9774   | 560.2282   | 1.393355   | 20.18352   | 65.56051   | 452.68073  | 3.5989542  | 16.896688  | 24.914722  |
| DD46   | 200.14378  | 455.15326  | 2.444216   | 16.091375  | 107.12756  | 298.27295  | 19.854525  | 25.941116  | 33.567936  |
| DD6    | 145.11194  | 488.83795  | 33.342552  | 16.328518  | 103.71663  | 324.5236   | 14.007834  | 11.014304  | 27.253883  |
| DD7    | 138.78287  | 477.81424  | 88.72818   | 25.724699  | 104.65568  | 205.08496  | 11.420075  | 20.128876  | 24.812775  |
| DD8    | 161.31097  | 563.5928   | 5.0694547  | 21.034552  | 100.9819   | 382.51538  | 5.4351406  | 11.133717  | 29.170408  |
| DD5    | 59.140118  | 566.3256   | 39.297207  | 10.847999  | 85.02426   | 181.33063  | 1.9945636  | 7.1044755  | 17.388298  |
| DD9    | 142.52374  | 569.0126   | 49.76866   | 19.563139  | 86.80527   | 293.43906  | 7.257605   | 2.5498478  | 11.422677  |
| DD103  | 333.92816  | 339.69922  | 7.0648265  | 78.95604   | 29.407194  | 369.91754  | 71.01913   | 95.333275  | 211.62361  |
| DD101  | 276.69733  | 177.6962   | 12.497434  | 69.44079   | 22.734247  | 146.40529  | 13.251307  | 86.18376   | 176.0884   |
| DD102  | 350.06827  | 310.942    | 8.483995   | 23.46585   | 23.905918  | 355.0021   | 116.20312  | 92.75315   | 237.2697   |
| DD105  | 322.03125  | 268.42142  | 8.216264   | 34.76695   | 18.124346  | 426.31592  | 55.422016  | 79.21773   | 155.19028  |
| DD106  | 257.9839   | 315.28598  | 1.3998036  | 68.35135   | 24.982042  | 177.82329  | 27.313599  | 97.545746  | 173.3508   |
| DD62   | 238.18263  | 198.4501   | 6.8352013  | 66.54613   | 15.449656  | 151.8718   | 86.70392   | 17.402351  | 130.8788   |
| DD64   | 230.04108  | 252.24197  | 3.7906516  | 114.15238  | 5.1099277  | 141.719    | 20.259567  | 52.25055   | 132.05202  |
| DD107  | 337.883    | 194.95499  | 1.2261949  | 86.37036   | 16.563362  | 328.02893  | 55.32884   | 68.17702   | 113.11041  |
| DD108  | 305.81705  | 543.2674   | 15.863982  | 59.0887    | 23.566305  | 211.51553  | 77.55648   | 26.944504  | 110.72266  |
| DD63   | 280.55865  | 773.33765  | 4.6334114  | 60.069828  | 10.929665  | 292.60242  | 98.40369   | 59.88996   | 120.81313  |
| DD23   | 286.6653   | 203.65053  | 22.347     | 63.651535  | 28.162766  | 210.73697  | 42.24914   | 49.483597  | 109.14237  |
| DD24   | 302.78735  | 160.73264  | 5.365493   | 61.41796   | 45.614845  | 171.70122  | 51.144302  | 2.4109025  | 114.32593  |
| DD110  | 160.88794  | 212.43494  | 3.4740195  | 65.47537   | 19.318356  | 307.6227   | 69.93688   | 41.05403   | 83.283775  |
| DD22   | 171.4584   | 478.42206  | 33.52398   | 59.61504   | 37.479424  | 93.93406   | 78.74491   | 34.781067  | 111.62243  |
| DD109  | 188.5651   | 562.3074   | 36.724224  | 98.300804  | 34.378323  | 85.48486   | 43.162376  | 33.878254  | 72.6859    |
| DD65   | 385.22836  | 206.37566  | 18.444925  | 103.04244  | 39.577805  | 69.15534   | 40.392414  | 19.14854   | 128.3896   |
| DD66   | 290.7969   | 143.55382  | 80.65752   | 162.34032  | 52.297077  | 226.42793  | 2.1508982  | 39.842735  | 88.48504   |
| DD67   | 334.3934   | 579.97797  | 29.266796  | 96.642525  | 66.344765  | 91.75957   | 41.700195  | 43.635098  | 96.14325   |
| DD69   | 435.34674  | 206.65102  | 23.515823  | 83.84906   | 44.04008   | 54.129906  | 52.0234    | 37.297775  | 116.22517  |
| DD68   | 516.5276   | 203.70886  | 64.016884  | 59.35664   | 43.645733  | 163.46675  | 46.923416  | 6.702028   | 116.59979  |
| DD25   | 324.8652   | 172.66698  | 11.801089  | 72.71209   | 26.067047  | 209.60033  | 55.771282  | 60.48922   | 177.06534  |
| DD28   | 211.76076  | 332.226    | 38.23634   | 108.82597  | 38.985703  | 71.104836  | 4.488839   | 26.457273  | 88.024254  |
| DD29   | 293.50528  | 436.08337  | 20.02927   | 76.60276   | 37.889324  | 273.50775  | 55.478302  | 27.662483  | 111.90246  |
| DD27   | 241.23228  | 162.71037  | 34.408157  | 100.75294  | 41.638847  | 182.72473  | 5.43561    | 45.40519   | 113.73631  |
| DD30   | 378.2871   | 192.19287  | 1.184121   | 121.08678  | 30.240095  | 162.88965  | 31.591873  | 39.49736   | 113.12418  |

## Cont'd Supplementary Table 2

| Animal | 1392767_at | 1392631_at | 1392598_at | 1392539_at | 1392531_at | 1392504_at | 1392444_at | 1392411_at | 1392392_at |
|--------|------------|------------|------------|------------|------------|------------|------------|------------|------------|
| DD81   | 173.03514  | 18.31096   | 891.6366   | 53.932026  | 37.596943  | 396.19998  | 99.06777   | 1.8932364  | 85.63      |
| DD84   | 230.31346  | 10.112484  | 837.00037  | 54.18646   | 44.933506  | 401.4213   | 73.87415   | 0.5967189  | 91.23534   |
| DD85   | 202.65439  | 14.014127  | 821.9613   | 45.84262   | 33.90819   | 417.39273  | 13.171545  | 4.1461368  | 82.40622   |
| DD86   | 172.6961   | 10.841177  | 794.87146  | 56.507233  | 42.313164  | 404.6145   | 71.87699   | 0.1887628  | 86.689865  |
| DD83   | 188.89746  | 5.9312463  | 811.2672   | 57.07745   | 43.402287  | 432.21268  | 29.97598   | 9.017009   | 81.99293   |
| DD41   | 190.34547  | 17.113594  | 798.3786   | 46.960155  | 25.09498   | 494.10318  | 73.74726   | 1.5698776  | 51.97944   |
| DD42   | 142.2514   | 29.988073  | 796.70447  | 51.795513  | 32.978706  | 427.48175  | 73.83645   | 6.0071554  | 60.4453    |
| DD43   | 171.73256  | 22.50377   | 614.2028   | 27.756311  | 19.386799  | 483.53378  | 40.347164  | 0.6448758  | 46.520935  |
| DD44   | 101.92334  | 23.967508  | 536.2095   | 61.633923  | 25.929197  | 453.95972  | 92.61125   | 5.9185615  | 51.9447    |
| DD87   | 151.34998  | 4.093577   | 684.99207  | 49.02683   | 18.772581  | 467.51672  | 61.308636  | 0.4190716  | 49.810925  |
| DD2    | 116.55824  | 19.718134  | 549.2014   | 46.00191   | 4.5876293  | 358.50592  | 87.51506   | 13.927321  | 46.030964  |
| DD3    | 146.93845  | 29.225061  | 603.4982   | 38.88662   | 3.8305936  | 386.0676   | 51.58595   | 6.5511537  | 47.36933   |
| DD89   | 125.94944  | 21.67976   | 699.6965   | 42.820553  | 19.068148  | 372.79614  | 72.4244    | 10.643992  | 55.96871   |
| DD90   | 147.63042  | 42.779114  | 674.09546  | 49.07045   | 14.681422  | 394.0273   | 76.824524  | 7.058094   | 77.638756  |
| DD4    | 125.26601  | 32.087177  | 553.8575   | 61.21205   | 18.158257  | 365.77905  | 80.61766   | 12.626333  | 61.869648  |
| DD47   | 107.68257  | 25.827703  | 516.1023   | 72.23895   | 23.166128  | 343.39578  | 58.655037  | 5.1614485  | 46.89515   |
| DD48   | 95.757126  | 27.16502   | 487.37082  | 34.84242   | 20.29274   | 426.57208  | 34.749443  | 4.9451675  | 33.52848   |
| DD49   | 140.87173  | 36.621094  | 910.34607  | 25.12147   | 26.233213  | 410.50278  | 62.563877  | 6.9703565  | 66.56147   |
| DD50   | 91.59181   | 23.774097  | 617.0949   | 79.52107   | 15.754764  | 391.73178  | 61.87172   | 10.05673   | 61.190918  |
| DD46   | 165.47467  | 37.7115    | 612.56146  | 74.083725  | 3.8802066  | 330.25275  | 77.62653   | 5.531299   | 71.87836   |
| DD6    | 162.4493   | 30.109232  | 657.67896  | 59.11112   | 29.302828  | 355.36368  | 87.59901   | 9.382241   | 70.471275  |
| DD7    | 163.74661  | 39.52748   | 695.3908   | 55.842777  | 15.243278  | 355.69717  | 32.431282  | 5.367401   | 56.46458   |
| DD8    | 169.51093  | 31.0261    | 716.5383   | 52.961372  | 13.10534   | 389.72775  | 48.619198  | 0.5870678  | 69.74912   |
| DD5    | 102.21158  | 22.832302  | 583.60126  | 41.4981    | 8.173256   | 439.56253  | 56.704597  | 4.7226605  | 57.929493  |
| DD9    | 171.95648  | 20.43668   | 687.4371   | 45.791367  | 20.972685  | 333.0021   | 34.248463  | 2.1374025  | 81.22687   |
| DD103  | 26.817442  | 42.079063  | 810.85077  | 52.872795  | 20.895433  | 140.13315  | 37.164555  | 8.086875   | 47.201077  |
| DD101  | 21.199497  | 29.311869  | 331.04544  | 52.75559   | 32.44917   | 181.89972  | 29.933416  | 9.23494    | 36.851376  |
| DD102  | 22.154165  | 36.90059   | 585.92596  | 114.4098   | 23.70944   | 133.09726  | 23.760386  | 7.808241   | 45.317078  |
| DD105  | 20.940811  | 16.038183  | 393.7247   | 106.54102  | 48.815792  | 125.33404  | 50.453438  | 8.128953   | 39.08147   |
| DD106  | 102.35988  | 40.862312  | 401.33115  | 90.148605  | 29.136665  | 135.48967  | 25.86672   | 7.485329   | 37.995712  |
| DD62   | 13.666998  | 11.660275  | 263.09387  | 81.373184  | 22.44358   | 183.1527   | 25.423355  | 3.8997874  | 31.413166  |
| DD64   | 11.500719  | 15.57878   | 257.00476  | 61.697834  | 2.6943414  | 143.95515  | 10.204725  | 14.09646   | 33.83642   |
| DD107  | 120.37974  | 15.827358  | 308.79932  | 124.91952  | 30.135904  | 173.6027   | 34.539     | 11.948994  | 31.976694  |
| DD108  | 32.119312  | 2.5739188  | 499.4423   | 138.78078  | 2.5906198  | 130.91022  | 15.48902   | 0.3598343  | 31.12642   |
| DD63   | 22.010914  | 9.9256115  | 396.85168  | 174.97647  | 17.396273  | 147.62425  | 9.371305   | 16.556986  | 35.176155  |
| DD23   | 18.812922  | 11.10939   | 285.36548  | 170.47418  | 6.439124   | 74.85238   | 6.6460137  | 7.346389   | 50.635902  |
| DD24   | 29.679283  | 37.997173  | 303.893    | 89.11038   | 7.551139   | 84.75035   | 5.1106977  | 5.994926   | 24.151985  |
| DD110  | 61.164433  | 6.641573   | 227.31052  | 67.15367   | 9.018735   | 136.06415  | 10.931849  | 1.0784712  | 35.158512  |
| DD22   | 83.58295   | 8.103289   | 405.44653  | 114.04629  | 17.95078   | 110.16111  | 14.725876  | 6.8205843  | 35.16033   |
| DD109  | 4.6338325  | 33.433514  | 192.30594  | 113.92725  | 2.7235472  | 109.30175  | 16.720785  | 11.889744  | 6.2273526  |
| DD65   | 41.23676   | 14.435343  | 710.06885  | 79.82314   | 21.304066  | 80.31151   | 3.5860164  | 12.22637   | 37.509674  |
| DD66   | 59.383095  | 10.984362  | 418.0254   | 150.963    | 2.584838   | 67.73662   | 6.278118   | 7.907344   | 5.242274   |
| DD67   | 3.7559087  | 18.640945  | 275.3603   | 75.96193   | 7.19479    | 161.70709  | 13.774428  | 16.747274  | 0.8893604  |
| DD69   | 7.6528306  | 19.516666  | 266.25146  | 130.00177  | 6.9022055  | 76.0759    | 27.226587  | 20.750027  | 8.058852   |
| DD68   | 23.132227  | 24.677437  | 284.58698  | 120.69669  | 8.106212   | 93.10488   | 20.635206  | 10.501063  | 24.470438  |
| DD25   | 5.3487573  | 19.707218  | 245.62184  | 164.31401  | 3.5954964  | 24.385788  | 14.227888  | 15.925242  | 56.954212  |
| DD28   | 16.614784  | 1.100018   | 218.32509  | 96.28072   | 12.438875  | 66.601494  | 6.1100883  | 12.416625  | 29.055466  |
| DD29   | 23.940876  | 8.834171   | 256.6291   | 83.41599   | 8.092377   | 64.83399   | 16.782927  | 16.666039  | 3.1802964  |
| DD27   | 4.4849114  | 16.853153  | 422.64096  | 96.09107   | 9.5691395  | 59.76228   | 21.453012  | 11.526761  | 32.550705  |
| DD30   | 33.174206  | 15.925667  | 361.1365   | 60.712597  | 19.477676  | 70.516495  | 26.393467  | 9.168382   | 26.42075   |

## Cont'd Supplementary Table 2

| Animal | 1392382_at | 1392381_at | 1392352_at | 1392308_at | 1392304_at | 1392283_at | 1392172_at | 1392074_at | 1392026_at |
|--------|------------|------------|------------|------------|------------|------------|------------|------------|------------|
| DD81   | 293.65668  | 28.593494  | 0.8868595  | 36.977802  | 45.500275  | 15.758865  | 10.256525  | 30.377558  | 134.33472  |
| DD84   | 312.41153  | 39.41752   | 0.7327049  | 44.041233  | 42.9688    | 9.25907    | 2.7409892  | 18.030666  | 154.21173  |
| DD85   | 362.07565  | 36.359703  | 9.203439   | 39.02241   | 49.457882  | 1.589754   | 1.7376798  | 22.389935  | 115.10605  |
| DD86   | 282.20956  | 40.268364  | 4.929619   | 40.46228   | 33.880466  | 4.9632096  | 13.431778  | 26.462898  | 99.65418   |
| DD83   | 289.04025  | 45.349644  | 6.578012   | 42.65832   | 61.212517  | 3.1185596  | 2.645845   | 3.1894684  | 124.50658  |
| DD41   | 251.58003  | 24.388678  | 28.233723  | 50.591442  | 62.821484  | 19.884752  | 8.947851   | 57.050724  | 135.78079  |
| DD42   | 163.66066  | 34.871864  | 9.423951   | 19.97377   | 22.853495  | 34.09664   | 2.4159458  | 62.5095    | 157.21393  |
| DD43   | 181.00677  | 15.336324  | 15.596706  | 49.924297  | 74.95293   | 2.8376234  | 1.9406781  | 79.800316  | 88.78728   |
| DD44   | 145.75061  | 29.625721  | 1.2157799  | 44.855003  | 45.77558   | 12.756686  | 4.9168777  | 61.483315  | 126.47196  |
| DD87   | 261.6684   | 4.742022   | 7.073731   | 43.89413   | 62.391678  | 28.769802  | 12.236114  | 64.607666  | 136.97968  |
| DD2    | 218.7744   | 10.118314  | 8.908207   | 45.397694  | 60.040657  | 4.159854   | 4.4271045  | 41.187145  | 190.66608  |
| DD3    | 296.9553   | 16.744493  | 18.913357  | 56.02937   | 53.283073  | 11.636645  | 16.02382   | 66.30959   | 134.77246  |
| DD89   | 265.35025  | 13.899374  | 18.300505  | 59.22242   | 78.82866   | 17.173355  | 2.3916142  | 89.87125   | 94.101685  |
| DD90   | 274.65744  | 3.1150005  | 16.056137  | 46.334126  | 54.17575   | 3.395929   | 3.5938191  | 86.52669   | 95.542366  |
| DD4    | 249.18427  | 12.622024  | 21.369799  | 47.006634  | 70.27584   | 16.047024  | 15.043675  | 51.689667  | 178.98372  |
| DD47   | 224.3007   | 2.553128   | 6.2007294  | 68.611275  | 57.194984  | 11.875001  | 9.983563   | 42.289955  | 103.6416   |
| DD48   | 103.5582   | 3.8126323  | 5.7409945  | 65.4302    | 64.52174   | 16.985136  | 18.391422  | 67.08738   | 91.520454  |
| DD49   | 358.2244   | 6.395148   | 16.881895  | 78.79396   | 54.058952  | 23.77266   | 31.280655  | 48.392166  | 128.34569  |
| DD50   | 204.37949  | 22.243786  | 2.7388468  | 98.829     | 43.73632   | 11.612748  | 6.2596726  | 42.727962  | 155.01636  |
| DD46   | 207.92159  | 27.150248  | 16.38544   | 49.44501   | 56.71799   | 31.211582  | 5.783767   | 62.494118  | 102.47265  |
| DD6    | 322.62723  | 13.054657  | 11.766321  | 74.756996  | 53.72999   | 37.210068  | 10.452802  | 40.772736  | 90.17937   |
| DD7    | 303.8741   | 6.0646863  | 11.730659  | 54.275394  | 46.934254  | 14.662906  | 46.17755   | 37.644936  | 133.07712  |
| DD8    | 335.7733   | 1.625947   | 10.446622  | 60.296883  | 47.7202    | 19.198103  | 5.868543   | 34.795498  | 120.04533  |
| DD5    | 156.1102   | 15.947102  | 17.473328  | 47.376945  | 53.687542  | 10.721785  | 23.523409  | 56.18022   | 38.246914  |
| DD9    | 266.44626  | 7.0156307  | 12.611474  | 72.90243   | 48.82768   | 23.440899  | 24.076303  | 8.345384   | 134.36261  |
| DD103  | 90.407936  | 41.832935  | 21.592497  | 17.790962  | 17.90363   | 3.7365897  | 2.9346452  | 140.27328  | 80.89318   |
| DD101  | 66.09072   | 50.871998  | 17.91424   | 3.1092248  | 5.2220287  | 13.764082  | 21.525711  | 145.2856   | 46.461964  |
| DD102  | 78.39227   | 58.029434  | 19.761623  | 19.423594  | 20.130466  | 3.9331012  | 7.181709   | 111.4739   | 84.07272   |
| DD105  | 111.6695   | 48.460716  | 23.263372  | 32.601334  | 14.361942  | 19.581196  | 7.5565042  | 96.08524   | 56.112843  |
| DD106  | 77.824104  | 52.45008   | 13.113617  | 3.748183   | 16.801416  | 13.875479  | 5.2236366  | 140.81654  | 52.719177  |
| DD62   | 57.248837  | 32.817696  | 8.85218    | 17.63915   | 23.790255  | 1.9535135  | 2.2456453  | 75.34204   | 46.61277   |
| DD64   | 50.139637  | 14.175567  | 7.7039356  | 41.14666   | 17.864073  | 13.743036  | 3.7574975  | 56.662186  | 72.07697   |
| DD107  | 66.98407   | 35.642082  | 21.310726  | 15.276654  | 11.801491  | 5.7933826  | 3.5298388  | 140.9679   | 39.165268  |
| DD108  | 61.384888  | 29.866985  | 19.83913   | 5.7321844  | 1.4265584  | 4.053792   | 3.625443   | 113.52821  | 80.2593    |
| DD63   | 35.41294   | 30.00105   | 18.607777  | 4.943788   | 3.8659875  | 28.272871  | 5.58776    | 59.182846  | 74.37452   |
| DD23   | 103.50234  | 28.469353  | 16.092869  | 26.928469  | 13.788817  | 5.231647   | 3.4414415  | 284.17502  | 89.45521   |
| DD24   | 84.09855   | 23.376328  | 1.6785135  | 13.658787  | 10.29271   | 3.8925018  | 18.466162  | 210.14464  | 73.699356  |
| DD110  | 43.441517  | 30.517685  | 0.653598   | 12.925768  | 11.946162  | 12.839977  | 3.802033   | 92.00531   | 62.35567   |
| DD22   | 78.363815  | 30.249763  | 23.573305  | 26.451408  | 16.19385   | 2.0830321  | 41.71572   | 153.70589  | 48.120007  |
| DD109  | 75.05924   | 36.424942  | 18.762938  | 44.54527   | 9.438639   | 4.214175   | 26.23301   | 187.08882  | 35.972015  |
| DD65   | 100.36214  | 11.930195  | 17.804884  | 25.465097  | 1.6077607  | 27.01123   | 27.686533  | 231.4626   | 36.23859   |
| DD66   | 69.907196  | 33.484295  | 17.116253  | 18.936958  | 17.562199  | 1.8292658  | 48.415257  | 144.63646  | 50.463955  |
| DD67   | 54.972622  | 33.67837   | 14.068767  | 35.23718   | 14.663647  | 23.032131  | 21.231808  | 92.44731   | 80.01326   |
| DD69   | 71.67952   | 26.901798  | 14.734669  | 34.92496   | 3.229377   | 2.4767814  | 17.488646  | 239.49454  | 90.89056   |
| DD68   | 133.24857  | 30.402046  | 16.166538  | 23.370909  | 12.781096  | 4.869998   | 37.440983  | 113.73975  | 74.73099   |
| DD25   | 77.30334   | 31.918299  | 16.71742   | 22.770498  | 20.779812  | 23.067137  | 11.071849  | 79.83492   | 61.360703  |
| DD28   | 86.67896   | 29.154703  | 4.645988   | 20.524174  | 10.491905  | 3.59987    | 24.418444  | 165.07655  | 85.419174  |
| DD29   | 98.94898   | 16.651342  | 14.270624  | 23.121126  | 26.136826  | 24.679768  | 23.814558  | 245.48177  | 139.5967   |
| DD27   | 90.64892   | 40.873863  | 18.010557  | 45.0395    | 11.846236  | 11.124929  | 36.45971   | 139.11931  | 91.62376   |
| DD30   | 152.89128  | 28.494896  | 14.412331  | 61.446278  | 15.079847  | 26.049429  | 9.809019   | 175.00618  | 111.81898  |

## Cont'd Supplementary Table 2

| Animal | 1391793_at | 1391757_at | 1391697_at | 1391600_at | 1391552_at | 1391500_at | 1391463_at | 1391355_at | 1391312_at |
|--------|------------|------------|------------|------------|------------|------------|------------|------------|------------|
| DD81   | 15.537846  | 24.937155  | 41.853867  | 63.936234  | 658.62683  | 24.150526  | 264.98108  | 4.0283313  | 26.048456  |
| DD84   | 10.161058  | 34.560917  | 42.106438  | 69.22133   | 577.46765  | 35.078205  | 256.7734   | 22.329756  | 21.522865  |
| DD85   | 4.569668   | 27.075014  | 22.542387  | 93.6745    | 678.6322   | 35.06825   | 246.77419  | 12.839534  | 36.735897  |
| DD86   | 4.3902016  | 27.757946  | 34.215126  | 65.34306   | 646.1066   | 32.7744    | 257.83554  | 26.965078  | 33.55348   |
| DD83   | 13.053838  | 17.862795  | 28.930233  | 77.874916  | 521.2704   | 53.614353  | 255.20697  | 9.0584545  | 40.133884  |
| DD41   | 7.4701266  | 54.864758  | 8.267118   | 137.6829   | 939.2481   | 45.611565  | 96.56894   | 10.472663  | 28.62874   |
| DD42   | 6.754912   | 59.265797  | 31.766829  | 123.38503  | 992.1576   | 23.34513   | 97.57138   | 17.96965   | 3.829546   |
| DD43   | 13.257258  | 62.674294  | 15.258537  | 59.751427  | 623.1146   | 46.352154  | 115.64404  | 12.108519  | 27.245258  |
| DD44   | 10.995839  | 37.260895  | 14.729424  | 103.92601  | 566.6508   | 30.274961  | 144.1254   | 7.427892   | 14.867556  |
| DD87   | 8.200041   | 44.985928  | 2.4272683  | 129.38661  | 851.2377   | 30.441563  | 119.11836  | 9.752664   | 28.578001  |
| DD2    | 18.981379  | 14.556355  | 7.2977915  | 194.38654  | 483.4321   | 70.485794  | 43.23727   | 12.314548  | 24.188421  |
| DD3    | 11.107675  | 39.0097    | 25.104538  | 172.43553  | 404.6279   | 41.48639   | 47.72132   | 7.9385242  | 7.064365   |
| DD89   | 9.475138   | 64.15997   | 13.885626  | 254.82524  | 406.55667  | 55.563274  | 55.209946  | 25.627321  | 27.151152  |
| DD90   | 12.798799  | 45.604496  | 19.226702  | 222.75749  | 444.02527  | 72.017975  | 60.252216  | 35.900574  | 14.066922  |
| DD4    | 17.7184    | 43.992764  | 20.402151  | 188.58469  | 399.78796  | 51.43633   | 59.425262  | 9.268882   | 8.126258   |
| DD47   | 4.794935   | 4.148477   | 7.1841865  | 213.33025  | 475.83298  | 62.535263  | 43.836018  | 27.903587  | 15.565206  |
| DD48   | 21.622911  | 42.98261   | 35.179348  | 68.25841   | 583.5345   | 41.81709   | 40.256615  | 22.476858  | 14.177198  |
| DD49   | 9.248639   | 45.672844  | 14.786485  | 327.97592  | 555.1967   | 63.17892   | 55.587574  | 21.425535  | 30.351574  |
| DD50   | 8.508967   | 26.734587  | 17.876226  | 161.52892  | 559.45593  | 73.53965   | 68.40585   | 21.219364  | 8.223709   |
| DD46   | 14.509483  | 33.749004  | 12.647859  | 193.93463  | 592.0767   | 58.28414   | 49.805626  | 13.433217  | 36.960373  |
| DD6    | 10.608796  | 33.76621   | 17.292456  | 308.8392   | 535.58057  | 63.40331   | 42.67812   | 8.735647   | 11.29167   |
| DD7    | 16.597559  | 31.55695   | 16.257257  | 282.6166   | 499.88864  | 58.4249    | 52.770424  | 23.245434  | 16.616512  |
| DD8    | 16.91486   | 32.283337  | 26.988842  | 270.0601   | 512.9745   | 59.42153   | 42.035313  | 15.35321   | 14.736592  |
| DD5    | 16.984226  | 51.30215   | 13.833686  | 59.111668  | 522.8363   | 46.361965  | 51.71175   | 21.115898  | 9.822928   |
| DD9    | 14.520688  | 31.237812  | 17.791548  | 226.25542  | 449.6162   | 68.178085  | 49.77914   | 26.097681  | 12.816306  |
| DD103  | 3.7523935  | 191.44681  | 55.6455    | 54.2795    | 81.433266  | 54.502148  | 257.71005  | 51.430405  | 10.131211  |
| DD101  | 9.603513   | 147.67157  | 52.308777  | 45.93004   | 288.6952   | 30.398619  | 177.35435  | 63.955555  | 16.020697  |
| DD102  | 7.61946    | 171.07747  | 55.023846  | 45.27697   | 82.405716  | 32.891167  | 276.91998  | 77.967285  | 12.859386  |
| DD105  | 11.959746  | 140.48961  | 74.93915   | 43.913044  | 308.91827  | 37.48326   | 235.18224  | 38.951202  | 13.214521  |
| DD106  | 0.508016   | 163.22537  | 56.474915  | 33.457664  | 70.63268   | 30.13888   | 276.03375  | 35.511227  | 15.51078   |
| DD62   | 5.4462605  | 73.33029   | 25.88244   | 31.296919  | 271.3077   | 17.058552  | 161.70735  | 36.929882  | 4.1686835  |
| DD64   | 16.993671  | 73.820465  | 36.30388   | 21.276829  | 271.98367  | 27.030363  | 470.90466  | 43.82888   | 3.6991134  |
| DD107  | 6.173584   | 99.996574  | 38.7656    | 37.878242  | 356.4413   | 25.134089  | 455.64215  | 37.675304  | 22.975494  |
| DD108  | 10.78843   | 69.51469   | 58.531578  | 42.305485  | 66.77024   | 27.220642  | 160.43178  | 30.548985  | 28.951668  |
| DD63   | 9.126668   | 67.21627   | 53.7407    | 26.972176  | 51.97412   | 34.758144  | 179.09589  | 47.363636  | 28.489946  |
| DD23   | 15.507403  | 123.99664  | 32.046715  | 46.810314  | 207.61194  | 26.415306  | 242.83977  | 11.590324  | 11.596464  |
| DD24   | 3.9386806  | 137.50192  | 34.71181   | 44.591393  | 170.19536  | 37.3659    | 103.9966   | 35.204037  | 12.366525  |
| DD110  | 4.9856253  | 52.868008  | 29.467888  | 54.753788  | 417.40247  | 30.213007  | 278.2425   | 47.75034   | 11.626524  |
| DD22   | 5.019416   | 89.686646  | 30.915916  | 70.08473   | 295.36707  | 19.358776  | 115.4458   | 18.00038   | 21.512049  |
| DD109  | 4.511118   | 55.2268    | 5.6805787  | 46.718918  | 440.49072  | 10.741874  | 245.56575  | 41.018604  | 12.268566  |
| DD65   | 1.7465364  | 147.92178  | 28.319696  | 51.596607  | 94.22913   | 39.849068  | 234.13191  | 26.769848  | 2.562351   |
| DD66   | 2.4191191  | 82.2128    | 33.885204  | 59.965584  | 221.81425  | 22.45315   | 368.08813  | 18.127855  | 15.54732   |
| DD67   | 14.01706   | 60.02617   | 32.934704  | 36.453773  | 694.8149   | 24.038618  | 301.86575  | 55.3806    | 19.471552  |
| DD69   | 1.2421645  | 79.421906  | 44.092804  | 38.412167  | 79.14626   | 13.91037   | 405.25433  | 7.0749903  | 1.1484143  |
| DD68   | 0.9121898  | 124.16196  | 46.26895   | 44.412247  | 428.42007  | 25.94365   | 112.59606  | 29.450048  | 14.107573  |
| DD25   | 10.370366  | 73.1298    | 36.864506  | 51.06017   | 449.51373  | 30.52955   | 195.42479  | 46.50717   | 21.956121  |
| DD28   | 8.696993   | 73.09826   | 42.060074  | 46.986095  | 474.47748  | 28.538994  | 199.9116   | 3.4716759  | 8.894185   |
| DD29   | 13.243445  | 115.18467  | 36.767746  | 73.09215   | 453.23297  | 24.794348  | 78.15745   | 25.422533  | 22.243402  |
| DD27   | 5.498186   | 88.96106   | 32.342033  | 61.252354  | 482.7437   | 28.0043    | 63.831955  | 20.738457  | 10.982931  |
| DD30   | 6.983971   | 135.03065  | 30.527779  | 79.801956  | 590.78687  | 43.26306   | 86.80461   | 24.97045   | 10.199538  |

## Cont'd Supplementary Table 2

| Animal | 1391150_at | 1391112_at | 1391041_at | 1390979_at | 1390906_at | 1390835_at | 1390813_at | 1390789_at | 1390777_at |
|--------|------------|------------|------------|------------|------------|------------|------------|------------|------------|
| DD81   | 13.229438  | 31.493729  | 52.61137   | 50.66294   | 73.412     | 6.5415072  | 26.996504  | 125.88459  | 165.64159  |
| DD84   | 19.834272  | 51.11877   | 55.871986  | 69.903305  | 69.89677   | 3.3505323  | 28.939642  | 85.303894  | 182.138    |
| DD85   | 16.549898  | 62.652424  | 54.478886  | 70.48047   | 66.47293   | 0.9677669  | 21.835558  | 99.98846   | 159.99687  |
| DD86   | 9.576746   | 32.592354  | 58.53017   | 56.660698  | 53.440216  | 1.1773564  | 30.601364  | 105.06286  | 133.71423  |
| DD83   | 11.783721  | 59.49119   | 59.2815    | 59.76498   | 68.633865  | 12.398336  | 32.005478  | 115.69022  | 201.35405  |
| DD41   | 10.86511   | 14.06398   | 38.407284  | 61.88213   | 212.144    | 1.9487997  | 116.59386  | 163.1635   | 135.3573   |
| DD42   | 7.8695965  | 11.448592  | 51.942     | 59.31816   | 223.39145  | 2.0649347  | 113.94098  | 148.82574  | 203.56915  |
| DD43   | 9.36863    | 15.291671  | 49.964424  | 71.43699   | 222.88602  | 7.3530087  | 93.464966  | 158.23718  | 165.11754  |
| DD44   | 11.674236  | 6.012329   | 36.070637  | 72.71471   | 166.28261  | 4.1550074  | 64.3606    | 149.84865  | 160.7058   |
| DD87   | 14.712863  | 5.1937156  | 36.437084  | 60.660633  | 209.11232  | 12.294328  | 94.190895  | 159.82881  | 189.02353  |
| DD2    | 5.509222   | 29.482721  | 11.604301  | 47.61405   | 181.60284  | 2.3576663  | 32.929287  | 313.77023  | 235.29591  |
| DD3    | 10.637014  | 28.94087   | 35.272457  | 59.963818  | 249.66887  | 1.9641588  | 63.39639   | 253.44453  | 230.89345  |
| DD89   | 14.403826  | 25.703642  | 45.8527    | 71.32413   | 287.8266   | 3.6339426  | 130.0849   | 216.69563  | 248.86145  |
| DD90   | 10.306332  | 11.575325  | 41.61079   | 40.395397  | 269.43045  | 2.1080258  | 102.73711  | 253.13533  | 237.70567  |
| DD4    | 17.199688  | 9.972358   | 39.63268   | 57.765938  | 259.65918  | 11.14393   | 96.50959   | 270.3638   | 160.35501  |
| DD47   | 14.118382  | 14.003022  | 24.907698  | 83.616486  | 190.34868  | 3.4927757  | 53.26062   | 200.67305  | 241.74939  |
| DD48   | 11.62864   | 12.632007  | 15.462444  | 98.82521   | 180.17819  | 16.258808  | 71.69271   | 250.34808  | 213.25708  |
| DD49   | 8.587616   | 27.738897  | 33.592594  | 94.01966   | 175.6118   | 1.0451252  | 68.95009   | 212.0647   | 332.2925   |
| DD50   | 13.602628  | 20.041986  | 60.07278   | 89.37646   | 244.15622  | 3.0413406  | 86.61042   | 237.11662  | 261.55927  |
| DD46   | 21.278807  | 7.036713   | 15.551453  | 56.545258  | 229.83696  | 3.2224126  | 78.4638    | 207.5371   | 194.10713  |
| DD6    | 15.586723  | 25.476349  | 24.384892  | 87.17762   | 232.56012  | 1.6248764  | 51.300343  | 240.40482  | 256.03778  |
| DD7    | 19.524971  | 9.598966   | 37.303123  | 81.84111   | 250.90297  | 1.1115129  | 59.383312  | 225.51846  | 266.77805  |
| DD8    | 21.224562  | 14.281323  | 41.97889   | 73.45507   | 239.69826  | 1.3546962  | 54.501366  | 219.81123  | 250.3922   |
| DD5    | 17.876873  | 9.855045   | 38.14124   | 74.55613   | 181.49995  | 2.0889282  | 95.17498   | 260.24295  | 206.97076  |
| DD9    | 18.429752  | 15.273201  | 23.302902  | 100.30269  | 194.637    | 6.4249434  | 38.456474  | 241.28674  | 263.27048  |
| DD103  | 42.961807  | 24.562273  | 114.60941  | 13.247156  | 184.75482  | 62.68727   | 167.5021   | 42.46319   | 114.39247  |
| DD101  | 23.104193  | 35.62349   | 123.36295  | 36.035767  | 56.267723  | 47.741875  | 150.61873  | 63.0134    | 112.37396  |
| DD102  | 32.22963   | 22.87182   | 140.05087  | 18.09827   | 131.01297  | 63.782608  | 184.08147  | 46.062096  | 110.00307  |
| DD105  | 21.615927  | 18.851967  | 120.01337  | 22.95541   | 56.75373   | 61.434856  | 211.85242  | 74.898315  | 201.50595  |
| DD106  | 38.21339   | 24.405474  | 127.82388  | 36.534077  | 55.71208   | 46.155327  | 169.5367   | 49.69464   | 89.04122   |
| DD62   | 26.104456  | 14.489221  | 112.22862  | 13.63843   | 84.13121   | 81.85661   | 62.92735   | 126.89122  | 33.726055  |
| DD64   | 29.96684   | 8.038616   | 117.44918  | 25.301493  | 60.613132  | 66.26717   | 106.91316  | 193.94485  | 124.46179  |
| DD107  | 27.269339  | 4.17668    | 127.90897  | 17.047485  | 69.225815  | 65.17642   | 271.6436   | 55.737286  | 58.439156  |
| DD108  | 33.94039   | 8.655047   | 114.63515  | 3.4946353  | 146.41809  | 98.95176   | 223.01033  | 63.857708  | 197.89705  |
| DD63   | 49.67614   | 28.329605  | 96.554436  | 18.563904  | 54.315857  | 80.166794  | 132.46854  | 70.433014  | 93.277695  |
| DD23   | 31.73645   | 26.65497   | 91.797066  | 20.978468  | 119.13552  | 181.29492  | 175.55641  | 137.63092  | 160.93103  |
| DD24   | 42.918648  | 15.394849  | 118.23663  | 16.85974   | 137.72137  | 153.72649  | 119.21053  | 109.23264  | 63.216698  |
| DD110  | 43.694263  | 6.833875   | 120.30348  | 38.44035   | 46.480938  | 134.3288   | 37.06154   | 119.49321  | 26.41947   |
| DD22   | 42.957188  | 6.019918   | 112.89105  | 29.09759   | 41.856552  | 96.69139   | 170.50577  | 113.64025  | 136.32724  |
| DD109  | 31.138794  | 2.1502302  | 141.64792  | 42.88469   | 59.92901   | 36.61928   | 258.4668   | 162.3473   | 161.15437  |
| DD65   | 109.73579  | 4.1386943  | 135.00858  | 24.051083  | 122.66985  | 94.93177   | 198.84685  | 140.01776  | 248.21202  |
| DD66   | 41.379223  | 4.7721     | 81.88217   | 24.770664  | 46.5464    | 34.911987  | 146.37845  | 107.61331  | 164.75352  |
| DD67   | 27.825495  | 5.215916   | 122.80383  | 22.994131  | 105.1195   | 41.864475  | 91.205574  | 213.98154  | 272.25967  |
| DD69   | 53.87109   | 17.312328  | 115.2843   | 14.456931  | 63.00219   | 67.18115   | 225.80063  | 146.15038  | 238.02405  |
| DD68   | 51.24489   | 19.114117  | 108.29752  | 3.0049648  | 98.74659   | 62.848312  | 119.08539  | 132.83571  | 233.52206  |
| DD25   | 53.5275    | 27.367168  | 107.68515  | 15.053372  | 93.00755   | 163.02704  | 51.776707  | 133.15848  | 53.86639   |
| DD28   | 43.590237  | 21.332691  | 100.82433  | 4.209511   | 31.870346  | 74.09935   | 79.00758   | 121.9349   | 152.45746  |
| DD29   | 87.55483   | 13.977062  | 86.54866   | 44.284527  | 108.23034  | 57.44597   | 209.44812  | 140.13322  | 66.889786  |
| DD27   | 27.23986   | 12.941759  | 106.0306   | 23.140825  | 113.51743  | 148.4073   | 57.429745  | 107.14784  | 240.7612   |
| DD30   | 41.601135  | 7.1521735  | 109.13813  | 25.398146  | 53.28731   | 56.401432  | 121.33922  | 133.37631  | 226.88428  |

## Cont'd Supplementary Table 2

| Animal | 1390749_at | 1390722_at | 1390562_s_ | 1390530_at | 1390491_at | 1390414_at | 1390284_at | 1389935_at | 1389918_at |
|--------|------------|------------|------------|------------|------------|------------|------------|------------|------------|
| DD81   | 14.310925  | 96.71161   | 11.418505  | 23.836702  | 39.671207  | 90.113556  | 145.3548   | 63.36268   | 136.30827  |
| DD84   | 6.0788383  | 108.80979  | 21.874584  | 17.066433  | 60.65912   | 91.813965  | 107.99236  | 63.229702  | 80.59437   |
| DD85   | 14.911988  | 93.50635   | 14.850606  | 17.934443  | 54.72964   | 81.85535   | 110.05676  | 55.32689   | 147.03386  |
| DD86   | 16.252789  | 76.7547    | 12.288945  | 21.422817  | 39.664696  | 93.87842   | 90.14899   | 59.22514   | 95.020355  |
| DD83   | 13.05907   | 84.32883   | 13.338013  | 20.041342  | 53.437687  | 82.49309   | 100.21274  | 79.11608   | 112.83157  |
| DD41   | 45.102436  | 71.22222   | 21.742548  | 25.279793  | 73.235916  | 195.16315  | 124.70836  | 65.42923   | 1493.6794  |
| DD42   | 20.584805  | 57.90987   | 14.582862  | 18.728437  | 67.91073   | 182.90411  | 77.50787   | 62.474014  | 1428.771   |
| DD43   | 12.505775  | 93.05495   | 12.971434  | 11.884255  | 42.908695  | 273.4351   | 138.92744  | 89.511     | 815.5195   |
| DD44   | 14.860943  | 34.59122   | 25.716152  | 15.383621  | 28.544895  | 156.89738  | 117.80296  | 76.95167   | 322.9704   |
| DD87   | 19.24256   | 73.21686   | 18.201208  | 22.40772   | 67.83232   | 232.94807  | 125.80957  | 92.310814  | 1110.1725  |
| DD2    | 2.2728386  | 47.80746   | 22.801735  | 6.9850845  | 65.513435  | 142.5281   | 118.312    | 69.7922    | 218.55946  |
| DD3    | 3.5332506  | 67.24862   | 62.761196  | 9.372375   | 48.0123    | 369.93454  | 157.14764  | 58.74293   | 683.88025  |
| DD89   | 60.90315   | 74.12584   | 54.139435  | 16.95872   | 92.48518   | 490.49777  | 103.76623  | 63.014484  | 1205.3761  |
| DD90   | 50.030327  | 82.320435  | 34.0576    | 20.34777   | 79.109985  | 423.6897   | 110.56603  | 67.59747   | 910.5055   |
| DD4    | 39.78386   | 68.06899   | 32.305527  | 22.309757  | 60.56561   | 360.944    | 105.33584  | 65.49262   | 652.8626   |
| DD47   | 11.254345  | 60.01489   | 32.005795  | 16.92323   | 77.972015  | 216.581    | 105.84688  | 97.06657   | 564.04004  |
| DD48   | 33.633667  | 45.175186  | 29.40171   | 18.841986  | 42.71017   | 251.5516   | 143.96704  | 111.01498  | 338.07162  |
| DD49   | 35.97209   | 175.59589  | 28.895603  | 23.749374  | 113.76149  | 382.97583  | 84.19242   | 65.18434   | 727.4036   |
| DD50   | 24.094263  | 100.82651  | 36.997623  | 13.447901  | 35.722614  | 382.503    | 105.76763  | 113.5379   | 591.03406  |
| DD46   | 37.69702   | 85.64573   | 33.900467  | 23.589146  | 80.222595  | 353.3888   | 114.62582  | 68.29599   | 631.82733  |
| DD6    | 34.765877  | 89.05518   | 27.780216  | 14.456454  | 134.42664  | 463.56558  | 98.750626  | 68.62125   | 413.93558  |
| DD7    | 20.97074   | 89.6967    | 29.562584  | 19.159077  | 104.71775  | 413.89343  | 116.86939  | 65.33813   | 496.9527   |
| DD8    | 8.350538   | 111.29982  | 48.89674   | 17.993235  | 98.61489   | 372.51962  | 109.81387  | 44.84061   | 356.02753  |
| DD5    | 19.175129  | 67.58987   | 35.19169   | 24.351498  | 30.328543  | 344.7264   | 119.62629  | 37.891823  | 451.25433  |
| DD9    | 2.0171933  | 127.2924   | 40.221596  | 13.098627  | 97.995636  | 302.9694   | 109.77763  | 78.07264   | 256.2383   |
| DD103  | 36.586617  | 71.80961   | 1.923854   | 49.550003  | 7.8301277  | 132.73636  | 33.51839   | 7.652259   | 2006.9934  |
| DD101  | 20.966244  | 1640.245   | 7.69374    | 45.334835  | 48.65345   | 151.3426   | 121.6976   | 6.515199   | 1474.1696  |
| DD102  | 23.87094   | 67.782936  | 24.793352  | 47.789387  | 25.282654  | 129.35442  | 36.78561   | 13.414472  | 2449.0125  |
| DD105  | 36.207645  | 1783.5531  | 1.4195993  | 44.27696   | 47.806984  | 142.08601  | 52.03633   | 9.168772   | 2450.6353  |
| DD106  | 38.176075  | 1890.9761  | 10.216192  | 52.27962   | 12.761261  | 153.93636  | 120.95811  | 7.676691   | 1921.6436  |
| DD62   | 13.528099  | 755.07825  | 12.427624  | 30.526926  | 43.531467  | 84.37172   | 84.68888   | 11.672131  | 748.2432   |
| DD64   | 13.891159  | 810.4788   | 8.357437   | 41.725143  | 30.160294  | 153.08437  | 106.62971  | 31.128963  | 981.6109   |
| DD107  | 38.89777   | 847.6189   | 12.192767  | 48.44329   | 44.710117  | 116.56258  | 37.894382  | 7.7331243  | 2426.5146  |
| DD108  | 53.165627  | 951.7933   | 20.453676  | 30.550076  | 22.447226  | 88.166405  | 33.19117   | 11.153371  | 2827.9348  |
| DD63   | 21.560427  | 48.02768   | 14.351038  | 54.92346   | 34.336975  | 117.34309  | 27.433107  | 8.847058   | 1083.4438  |
| DD23   | 31.587475  | 841.50977  | 15.451719  | 32.2734    | 35.125168  | 132.45209  | 77.21662   | 6.873169   | 2273.0276  |
| DD24   | 55.198494  | 890.54     | 27.856918  | 34.738438  | 7.4799438  | 135.20052  | 140.85477  | 8.488958   | 2084.4844  |
| DD110  | 29.436195  | 835.3194   | 18.62838   | 35.488056  | 3.7075408  | 72.59589   | 127.96158  | 15.456055  | 529.974    |
| DD22   | 45.553787  | 1361.2017  | 3.9276755  | 40.14902   | 24.01014   | 117.80467  | 139.64604  | 10.69873   | 971.1666   |
| DD109  | 21.633007  | 40.866165  | 17.322432  | 25.531603  | 45.335026  | 168.31209  | 108.53579  | 6.117218   | 1018.4943  |
| DD65   | 41.416298  | 1073.9247  | 2.7995334  | 42.242756  | 92.13124   | 246.52948  | 63.148823  | 4.530292   | 2732.181   |
| DD66   | 42.010857  | 874.80536  | 1.5300186  | 23.139608  | 62.59396   | 156.4779   | 85.96489   | 6.163095   | 1512.3317  |
| DD67   | 39.6611    | 1106.7882  | 14.971902  | 28.689587  | 63.544376  | 114.32237  | 81.8228    | 42.165066  | 830.9362   |
| DD69   | 38.44937   | 54.63975   | 26.612541  | 22.227304  | 71.06457   | 138.08571  | 42.54871   | 8.605807   | 1378.3837  |
| DD68   | 20.89711   | 1786.9473  | 18.23778   | 34.348377  | 74.70734   | 125.03965  | 17.690708  | 1.6415888  | 1238.0828  |
| DD25   | 36.968925  | 952.4075   | 26.46524   | 25.319489  | 19.506239  | 93.975815  | 61.69166   | 54.657146  | 947.2401   |
| DD28   | 11.654306  | 1887.8821  | 2.0635467  | 34.920128  | 31.497992  | 66.38203   | 39.790073  | 2.9226375  | 807.83075  |
| DD29   | 42.588894  | 105.68226  | 20.204235  | 33.543484  | 10.563833  | 152.94592  | 87.890205  | 20.622461  | 1087.3914  |
| DD27   | 22.118027  | 971.0303   | 12.251581  | 40.331863  | 119.79485  | 94.18088   | 67.37675   | 43.73168   | 1418.1003  |
| DD30   | 25.889393  | 2001.065   | 3.9058034  | 23.711044  | 26.056568  | 95.81968   | 45.197613  | 5.418425   | 1805.6107  |

## Cont'd Supplementary Table 2

| Animal | 1389734_x_ | 1389651_at | 1389467_at | 1389409_at | 1389369_at | 1389142_at | 1389093_at | 1389086_at | 1388654_at |
|--------|------------|------------|------------|------------|------------|------------|------------|------------|------------|
| DD81   | 54.894066  | 277.64606  | 865.13965  | 32.867874  | 40.432255  | 204.04146  | 119.35389  | 112.41173  | 138.87695  |
| DD84   | 46.64102   | 290.02597  | 691.80756  | 56.01612   | 49.5012    | 202.4233   | 131.43808  | 108.0752   | 139.74211  |
| DD85   | 53.15231   | 257.7959   | 593.24365  | 40.777473  | 48.7174    | 226.77287  | 149.05109  | 91.283844  | 186.10793  |
| DD86   | 56.89195   | 282.10028  | 605.1192   | 39.26959   | 42.33342   | 206.43124  | 128.76732  | 105.55143  | 189.34966  |
| DD83   | 46.973083  | 245.03328  | 649.6237   | 27.470892  | 59.466034  | 257.76746  | 125.45474  | 106.05611  | 96.91289   |
| DD41   | 30.032667  | 160.88841  | 522.88776  | 22.391941  | 38.080444  | 286.4874   | 72.48386   | 100.09116  | 168.0105   |
| DD42   | 48.60037   | 107.9111   | 600.45306  | 7.4082127  | 48.68508   | 297.82056  | 62.8708    | 107.07282  | 148.89885  |
| DD43   | 34.927864  | 88.147026  | 784.43646  | 30.183256  | 37.975746  | 287.7537   | 71.19105   | 76.668236  | 81.600075  |
| DD44   | 39.828922  | 143.77025  | 737.1438   | 36.816708  | 38.311047  | 280.42242  | 60.95914   | 83.00869   | 127.99152  |
| DD87   | 45.176918  | 86.97851   | 511.69095  | 39.218693  | 67.18472   | 380.2482   | 88.26871   | 91.69056   | 144.00607  |
| DD2    | 46.018     | 51.232452  | 363.643    | 24.001068  | 47.754086  | 473.97775  | 40.07687   | 116.14852  | 147.50395  |
| DD3    | 48.18985   | 52.822365  | 401.87247  | 28.383146  | 45.98448   | 400.6759   | 47.043552  | 95.944275  | 97.184906  |
| DD89   | 38.204575  | 38.89501   | 618.82025  | 38.645008  | 61.847736  | 431.05417  | 52.595154  | 108.59718  | 112.1626   |
| DD90   | 53.785004  | 45.17236   | 453.12738  | 28.744352  | 50.970943  | 363.3159   | 63.039894  | 76.87003   | 118.98565  |
| DD4    | 51.825375  | 44.352425  | 442.75925  | 38.820045  | 17.469412  | 454.38165  | 52.780457  | 129.35022  | 103.78352  |
| DD47   | 41.25894   | 37.837704  | 537.8058   | 36.294697  | 30.421724  | 487.669    | 41.013218  | 114.26093  | 138.04747  |
| DD48   | 59.574234  | 31.385576  | 648.61865  | 26.530098  | 36.445385  | 455.0637   | 27.090948  | 116.539    | 117.11588  |
| DD49   | 33.059856  | 35.834557  | 369.376    | 28.312704  | 50.815502  | 492.9136   | 41.396797  | 100.82998  | 164.59071  |
| DD50   | 65.62564   | 35.622776  | 452.47162  | 27.372032  | 60.676888  | 553.0612   | 40.162228  | 100.85701  | 147.31151  |
| DD46   | 39.512733  | 57.00203   | 369.8391   | 6.4932814  | 9.383587   | 469.7696   | 45.125957  | 147.1284   | 161.24117  |
| DD6    | 59.689793  | 42.357597  | 269.21765  | 24.482908  | 41.20509   | 684.081    | 35.44772   | 95.458115  | 144.63776  |
| DD7    | 48.833885  | 28.823914  | 378.68063  | 28.666162  | 39.397453  | 529.8165   | 40.912655  | 107.63377  | 104.51499  |
| DD8    | 49.038155  | 35.912315  | 250.64806  | 31.285084  | 33.52478   | 574.5786   | 27.053986  | 99.07354   | 126.58751  |
| DD5    | 48.27603   | 48.633793  | 388.93988  | 44.50955   | 33.08394   | 370.80023  | 47.439415  | 77.5929    | 134.78044  |
| DD9    | 34.321     | 29.558918  | 290.53693  | 33.754856  | 49.269115  | 562.0473   | 43.05746   | 106.29345  | 140.80821  |
| DD103  | 304.98404  | 326.96033  | 301.2657   | 68.28634   | 132.50081  | 144.19255  | 163.11061  | 81.01267   | 81.22257   |
| DD101  | 112.70079  | 304.82758  | 291.57816  | 70.41699   | 171.04877  | 149.04454  | 173.8999   | 68.507805  | 62.02864   |
| DD102  | 473.38922  | 294.85336  | 283.15494  | 60.590286  | 114.96513  | 142.37192  | 178.98984  | 65.443985  | 65.11396   |
| DD105  | 220.7129   | 284.2282   | 351.44046  | 81.25322   | 118.33929  | 144.01129  | 256.94012  | 57.470066  | 62.19352   |
| DD106  | 96.43275   | 308.24548  | 205.47153  | 45.198166  | 178.63858  | 130.73727  | 134.42114  | 53.203987  | 73.82603   |
| DD62   | 229.19366  | 284.52972  | 246.26784  | 23.372534  | 124.41171  | 156.04826  | 176.1417   | 39.46032   | 66.0616    |
| DD64   | 121.01853  | 191.16017  | 196.7563   | 27.186523  | 192.56868  | 168.956    | 159.10037  | 54.988697  | 41.48436   |
| DD107  | 222.57614  | 258.59833  | 197.62355  | 26.3878    | 128.69783  | 179.93254  | 133.55688  | 45.19434   | 49.151722  |
| DD108  | 255.20537  | 229.02089  | 177.2338   | 44.835434  | 129.24077  | 170.76762  | 141.26334  | 41.930393  | 62.59711   |
| DD63   | 244.92554  | 223.50322  | 193.70297  | 35.451633  | 104.59433  | 151.1865   | 100.16825  | 49.1531    | 34.039124  |
| DD23   | 171.70132  | 105.5377   | 197.16183  | 4.23408    | 164.356    | 175.90822  | 121.52435  | 33.370766  | 55.621326  |
| DD24   | 151.80725  | 46.781685  | 281.87573  | 19.680336  | 133.82457  | 205.18646  | 53.71188   | 55.763985  | 9.964585   |
| DD110  | 178.64375  | 83.99787   | 347.60706  | 26.366013  | 120.46782  | 201.14795  | 164.58812  | 50.245518  | 46.643497  |
| DD22   | 210.18927  | 55.438663  | 228.81322  | 7.927228   | 110.78234  | 146.40587  | 137.6536   | 54.529495  | 43.707348  |
| DD109  | 121.42048  | 87.76982   | 280.24725  | 3.4224956  | 123.45207  | 181.61679  | 91.187454  | 57.275166  | 35.610325  |
| DD65   | 173.27402  | 61.262856  | 80.070526  | 19.483343  | 243.40334  | 240.73923  | 65.0463    | 57.323017  | 146.03857  |
| DD66   | 82.15554   | 92.627785  | 90.68218   | 2.3152707  | 213.07497  | 223.91832  | 103.64339  | 46.524387  | 59.647747  |
| DD67   | 202.16225  | 77.51076   | 220.12158  | 14.605633  | 121.37684  | 218.78539  | 134.40395  | 53.66807   | 46.309456  |
| DD69   | 201.40248  | 90.15047   | 124.18489  | 12.499801  | 134.7556   | 222.083    | 103.23249  | 64.92213   | 45.164547  |
| DD68   | 192.49554  | 105.76686  | 56.768803  | 16.14264   | 111.10638  | 179.83578  | 168.5384   | 36.804638  | 53.75254   |
| DD25   | 169.57332  | 94.50015   | 74.04015   | 6.602375   | 127.29449  | 217.9882   | 85.03902   | 93.88584   | 51.14782   |
| DD28   | 106.05256  | 76.56406   | 118.59333  | 2.7416391  | 183.59819  | 217.45284  | 106.57113  | 29.723658  | 60.2363    |
| DD29   | 207.86166  | 74.306786  | 66.87216   | 15.873383  | 110.27757  | 207.53409  | 104.255    | 49.82323   | 55.767784  |
| DD27   | 26.135733  | 71.89926   | 174.67087  | 13.999904  | 144.933    | 207.39944  | 103.03018  | 79.735794  | 72.33056   |
| DD30   | 20.104378  | 80.745926  | 118.8919   | 4.238162   | 242.71205  | 220.41536  | 88.437515  | 28.82206   | 68.47695   |

## Cont'd Supplementary Table 2

| Animal | 1388603_a | 1388578_at | 1388255_x | 1388202_at | 1388102_at | 1388071_x | 1387870_at | 1387839_at | 1387795_at |
|--------|-----------|------------|-----------|------------|------------|-----------|------------|------------|------------|
| DD81   | 2902.8127 | 434.2174   | 4.8243275 | 8.053682   | 94.129944  | 387.155   | 298.02594  | 6.153264   | 144.31544  |
| DD84   | 3040.862  | 427.06607  | 9.758844  | 9.5305805  | 82.62557   | 283.4118  | 518.63837  | 1.6042991  | 157.73677  |
| DD85   | 3102.7493 | 434.14066  | 10.658617 | 1.7115701  | 95.21552   | 362.7102  | 331.11328  | 11.193729  | 172.05101  |
| DD86   | 2905.0896 | 417.01562  | 4.0298686 | 11.898196  | 94.12414   | 407.19708 | 291.97174  | 11.449606  | 177.139    |
| DD83   | 2983.052  | 408.3738   | 7.9672337 | 3.4050355  | 78.753105  | 373.95822 | 507.72687  | 13.051782  | 166.93399  |
| DD41   | 3220.248  | 397.7338   | 1.1866643 | 7.249976   | 54.68238   | 415.987   | 240.72356  | 13.438036  | 129.64607  |
| DD42   | 3537.3162 | 465.0847   | 1.4489695 | 1.1332308  | 59.126625  | 301.40112 | 270.49844  | 1.5541321  | 141.6386   |
| DD43   | 3196.6042 | 512.76715  | 7.068097  | 9.553428   | 65.635185  | 369.4709  | 415.25314  | 2.0569184  | 93.0962    |
| DD44   | 3063.7056 | 433.78012  | 12.850875 | 13.671165  | 82.28987   | 308.76785 | 419.8609   | 14.829702  | 138.88908  |
| DD87   | 3219.298  | 444.71387  | 11.020222 | 2.8740933  | 40.736645  | 330.82123 | 463.30655  | 14.544666  | 88.62055   |
| DD2    | 3159.8323 | 435.71774  | 10.169839 | 4.6225677  | 25.410395  | 521.6183  | 1096.637   | 8.414576   | 51.65226   |
| DD3    | 3205.2585 | 463.85522  | 8.888573  | 7.214656   | 54.197857  | 334.2898  | 400.7029   | 9.041524   | 60.26405   |
| DD89   | 3174.152  | 463.74295  | 1.8557683 | 14.054975  | 37.83594   | 266.77325 | 354.8512   | 9.715629   | 52.665432  |
| DD90   | 2870.1135 | 475.20773  | 19.187243 | 12.640631  | 58.26589   | 292.17703 | 229.57512  | 13.672601  | 59.461704  |
| DD4    | 2897.2246 | 465.37207  | 0.8550586 | 9.469556   | 55.462906  | 299.64352 | 502.0066   | 10.001964  | 67.51399   |
| DD47   | 2901.941  | 472.0731   | 8.190168  | 2.1170135  | 44.570457  | 381.94205 | 231.19125  | 3.5991814  | 38.34801   |
| DD48   | 3434.3335 | 648.9304   | 19.776348 | 15.884516  | 45.916397  | 367.91064 | 494.0885   | 2.3658628  | 65.43304   |
| DD49   | 2925.568  | 505.35287  | 8.220104  | 9.188238   | 49.104103  | 261.31696 | 222.04846  | 11.375954  | 52.55564   |
| DD50   | 3169.7832 | 518.05505  | 11.281645 | 13.57269   | 36.642742  | 351.9429  | 607.77527  | 11.088438  | 55.32188   |
| DD46   | 2996.7693 | 468.5948   | 3.3915    | 13.013431  | 53.79688   | 431.17578 | 453.93097  | 8.571916   | 34.896023  |
| DD6    | 3250.0212 | 483.1342   | 10.899447 | 6.801898   | 40.156384  | 333.20572 | 249.75093  | 2.4677389  | 47.29365   |
| DD7    | 3117.5225 | 539.21893  | 6.577693  | 1.4786142  | 59.88175   | 344.7645  | 341.14835  | 2.250052   | 49.1642    |
| DD8    | 3209.5894 | 473.27982  | 3.7797978 | 3.6026225  | 67.92303   | 270.49316 | 382.65854  | 2.1783247  | 36.21888   |
| DD5    | 3512.344  | 558.26105  | 9.003518  | 1.3108007  | 72.02939   | 287.04474 | 245.07307  | 4.4297934  | 74.21689   |
| DD9    | 3231.3865 | 525.10266  | 15.072976 | 12.720954  | 47.027615  | 248.27545 | 322.98642  | 10.665277  | 34.612434  |
| DD103  | 420.29523 | 127.28952  | 25.67161  | 19.763008  | 72.90115   | 1211.8881 | 140.27013  | 22.54891   | 205.55746  |
| DD101  | 391.3702  | 145.69293  | 14.559672 | 35.092365  | 202.0574   | 1473.5898 | 132.8449   | 12.849531  | 245.29062  |
| DD102  | 382.31937 | 124.26299  | 8.127204  | 9.580175   | 163.00316  | 357.7638  | 133.43599  | 8.158312   | 190.98805  |
| DD105  | 438.09387 | 126.77058  | 15.421453 | 28.337387  | 104.83525  | 977.8828  | 124.2443   | 13.252771  | 146.5573   |
| DD106  | 401.95563 | 137.05191  | 9.6676655 | 37.78469   | 130.30122  | 1526.2314 | 121.04662  | 6.146901   | 169.37202  |
| DD62   | 631.7202  | 181.70062  | 17.916784 | 26.989468  | 117.90043  | 1507.2753 | 210.38676  | 11.676047  | 262.1077   |
| DD64   | 1556.8761 | 368.16257  | 49.60157  | 60.855484  | 145.00075  | 2155.2488 | 397.27332  | 19.34386   | 216.50037  |
| DD107  | 720.69305 | 163.02802  | 10.602318 | 47.106895  | 120.75177  | 1400.8385 | 242.7299   | 4.1388946  | 265.13437  |
| DD108  | 1855.0881 | 145.57466  | 33.082634 | 24.548235  | 43.54422   | 1380.5344 | 199.45406  | 12.632119  | 286.63058  |
| DD63   | 1839.3368 | 197.96675  | 39.711147 | 33.074123  | 156.47202  | 1298.94   | 225.36124  | 27.241491  | 230.1779   |
| DD23   | 1765.2517 | 197.58391  | 49.581577 | 23.507135  | 100.85076  | 1150.3213 | 254.74176  | 31.645397  | 165.58081  |
| DD24   | 736.4233  | 404.41458  | 14.631132 | 19.826838  | 130.21217  | 997.6344  | 215.79619  | 23.41438   | 160.64879  |
| DD110  | 530.2179  | 411.19403  | 28.813236 | 17.99429   | 144.5157   | 1254.3054 | 227.34138  | 15.86982   | 212.50017  |
| DD22   | 744.8255  | 196.6864   | 10.674249 | 14.597994  | 111.55976  | 1126.8652 | 220.54247  | 13.598909  | 230.9261   |
| DD109  | 685.2147  | 175.8449   | 57.738346 | 25.023455  | 155.98518  | 1031.8899 | 203.58498  | 31.558525  | 183.2288   |
| DD65   | 685.30975 | 418.9564   | 2.773244  | 36.178116  | 123.33728  | 1197.1653 | 150.52751  | 21.893827  | 144.06262  |
| DD66   | 782.2656  | 185.16876  | 29.845655 | 39.100655  | 124.35448  | 1416.9904 | 221.46454  | 27.737093  | 177.14722  |
| DD67   | 506.51917 | 172.25366  | 7.68959   | 25.57014   | 127.76198  | 1006.4185 | 190.0125   | 8.489285   | 98.65905   |
| DD69   | 851.9164  | 139.46129  | 9.422948  | 21.089403  | 96.454056  | 1101.1947 | 184.26971  | 17.244432  | 135.02023  |
| DD68   | 750.98865 | 156.37665  | 10.716497 | 22.593227  | 128.45161  | 1001.0783 | 165.44833  | 20.072275  | 194.30203  |
| DD25   | 1793.7064 | 200.00372  | 35.527363 | 19.234602  | 55.272488  | 1061.4647 | 299.4694   | 23.290499  | 137.7151   |
| DD28   | 670.10815 | 164.16046  | 7.5524507 | 21.17614   | 111.86506  | 1199.0382 | 245.34743  | 26.2415    | 179.11081  |
| DD29   | 591.6229  | 221.53491  | 17.04569  | 24.95946   | 129.81825  | 1087.6487 | 284.35556  | 4.7402544  | 152.09277  |
| DD27   | 817.7647  | 212.2161   | 46.551506 | 27.196966  | 125.28527  | 1356.8308 | 252.91985  | 41.50916   | 135.90633  |
| DD30   | 567.82214 | 224.46329  | 54.6528   | 26.152908  | 138.75743  | 1238.7327 | 204.28506  | 40.94264   | 117.28872  |

## Cont'd Supplementary Table 2

| Animal | 1387366_at | 1387348_at | 1387296_at | 1387060_at | 1386941_at | 1386855_at | 1386770_x_ | 1386621_at | 1386514_at |
|--------|------------|------------|------------|------------|------------|------------|------------|------------|------------|
| DD81   | 126.06867  | 142.24213  | 61.217636  | 11.787746  | 601.84326  | 47.58179   | 13.609503  | 89.87203   | 35.482246  |
| DD84   | 102.10834  | 113.08093  | 47.66288   | 13.782803  | 486.29782  | 50.47356   | 15.389261  | 97.06624   | 23.661894  |
| DD85   | 96.74074   | 170.1983   | 57.53941   | 19.567636  | 488.70786  | 48.50131   | 18.371622  | 65.35861   | 30.436623  |
| DD86   | 112.78854  | 114.45847  | 60.29774   | 8.729057   | 737.4486   | 46.121613  | 18.247715  | 96.36925   | 12.011872  |
| DD83   | 103.02976  | 137.00624  | 66.44576   | 11.436582  | 551.69336  | 61.000107  | 24.61603   | 79.2141    | 23.400967  |
| DD41   | 103.09731  | 356.17004  | 79.13518   | 105.49217  | 333.94083  | 45.985394  | 13.984127  | 108.18289  | 28.31251   |
| DD42   | 102.43968  | 392.2809   | 52.38752   | 110.15802  | 431.9271   | 64.465324  | 25.085213  | 83.40782   | 38.444653  |
| DD43   | 121.19176  | 228.30095  | 55.43959   | 147.8124   | 368.0994   | 26.935379  | 26.050945  | 110.27859  | 69.81589   |
| DD44   | 148.43152  | 309.5868   | 45.92783   | 49.04677   | 413.56943  | 43.25616   | 14.492332  | 142.32341  | 19.24172   |
| DD87   | 96.81963   | 225.16594  | 60.55016   | 73.019295  | 394.9466   | 52.931152  | 19.310701  | 111.38857  | 34.85269   |
| DD2    | 190.13142  | 104.3136   | 47.440395  | 84.179115  | 511.7824   | 42.921124  | 13.581817  | 94.72437   | 35.888794  |
| DD3    | 166.48032  | 110.2747   | 66.52723   | 128.33327  | 374.0113   | 65.84815   | 23.007591  | 116.71439  | 64.91531   |
| DD89   | 192.7311   | 161.55492  | 59.5038    | 186.68161  | 371.83652  | 49.606125  | 20.408068  | 124.43636  | 46.61982   |
| DD90   | 136.6599   | 106.28381  | 58.288925  | 116.26974  | 380.39548  | 46.558533  | 25.468464  | 110.78732  | 50.673443  |
| DD4    | 160.19643  | 114.8945   | 62.168808  | 162.82986  | 356.87518  | 46.877796  | 22.753086  | 110.88971  | 41.155937  |
| DD47   | 150.69916  | 118.73885  | 70.91462   | 38.96752   | 379.8334   | 36.098328  | 34.473164  | 99.52474   | 18.889349  |
| DD48   | 119.49832  | 155.57466  | 47.45464   | 123.58232  | 317.6814   | 33.52181   | 47.155678  | 89.31879   | 52.58401   |
| DD49   | 97.12989   | 104.64197  | 71.44384   | 85.81963   | 294.65137  | 63.228413  | 34.06121   | 92.783424  | 55.53869   |
| DD50   | 131.2204   | 98.56669   | 43.58206   | 142.72833  | 386.47217  | 40.6489    | 28.620413  | 80.57179   | 83.64114   |
| DD46   | 150.58855  | 121.85783  | 70.7842    | 125.9741   | 335.3244   | 46.85017   | 16.590874  | 101.18996  | 80.97282   |
| DD6    | 156.15836  | 119.95936  | 47.14618   | 73.48993   | 346.1493   | 70.70365   | 31.652384  | 117.60815  | 46.445774  |
| DD7    | 136.05919  | 140.53508  | 38.51258   | 103.44675  | 460.36615  | 46.589745  | 31.258049  | 114.83801  | 41.3865    |
| DD8    | 103.41518  | 92.9733    | 66.18273   | 78.97937   | 437.92688  | 43.689236  | 42.15211   | 112.52936  | 36.590218  |
| DD5    | 124.71265  | 133.0505   | 57.038208  | 101.89188  | 279.73196  | 37.28626   | 21.586622  | 124.05992  | 42.919785  |
| DD9    | 152.9999   | 109.2485   | 67.29869   | 49.966198  | 361.08255  | 55.13272   | 25.575012  | 90.60848   | 37.330303  |
| DD103  | 43.20285   | 358.37863  | 161.85204  | 297.7361   | 1268.9667  | 767.59393  | 11.031155  | 18.049864  | 10.571279  |
| DD101  | 68.07464   | 348.9229   | 143.74538  | 288.9904   | 1176.8009  | 623.39294  | 2.177337   | 15.314453  | 6.23714    |
| DD102  | 49.868927  | 321.67593  | 158.43347  | 360.57657  | 1213.6234  | 393.7679   | 2.1778965  | 67.00991   | 1.7246016  |
| DD105  | 106.12992  | 346.15845  | 156.3988   | 300.6016   | 1216.47    | 352.72867  | 9.516367   | 49.55258   | 10.872645  |
| DD106  | 44.141373  | 263.16568  | 158.32578  | 265.29395  | 598.43634  | 631.5268   | 11.054687  | 15.358194  | 9.306219   |
| DD62   | 57.439396  | 296.58826  | 110.19175  | 216.32448  | 356.14725  | 34.12642   | 12.506909  | 121.7649   | 5.1470284  |
| DD64   | 107.82461  | 389.7749   | 148.28976  | 221.63075  | 1446.9658  | 60.6049    | 1.3173833  | 129.11487  | 13.068401  |
| DD107  | 99.13481   | 423.7167   | 171.61351  | 223.24416  | 959.9322   | 263.5752   | 6.9342294  | 45.795593  | 1.8414711  |
| DD108  | 32.39182   | 254.88182  | 154.11456  | 170.47076  | 1828.6196  | 493.47775  | 23.488941  | 8.952977   | 6.5070457  |
| DD63   | 61.096325  | 438.28415  | 102.43475  | 211.32845  | 1715.1952  | 547.36395  | 2.751728   | 19.004848  | 3.2462897  |
| DD23   | 126.56611  | 544.9109   | 161.1351   | 289.28986  | 915.9809   | 281.10443  | 8.027356   | 55.40032   | 19.382198  |
| DD24   | 69.21533   | 183.79558  | 158.81537  | 355.4022   | 1644.7616  | 264.16144  | 6.3708854  | 58.021206  | 18.088614  |
| DD110  | 49.19895   | 315.8228   | 128.52383  | 186.8902   | 1803.1146  | 295.36224  | 2.8022134  | 39.065056  | 10.565928  |
| DD22   | 60.16669   | 338.12402  | 162.80301  | 160.25038  | 1550.3464  | 463.58466  | 0.8509345  | 25.97451   | 6.5910554  |
| DD109  | 67.78437   | 305.90265  | 165.86003  | 116.45668  | 1518.5763  | 453.67612  | 8.077635   | 30.840347  | 5.3660665  |
| DD65   | 83.33945   | 446.8953   | 133.14684  | 199.03693  | 1109.2618  | 521.57556  | 3.0528197  | 11.334899  | 13.951586  |
| DD66   | 25.234306  | 262.87646  | 94.314766  | 228.40523  | 1439.0536  | 194.31155  | 24.106468  | 63.36826   | 11.271646  |
| DD67   | 50.256287  | 246.42735  | 160.51372  | 280.94238  | 1539.035   | 291.45163  | 1.4915279  | 32.378757  | 3.4552276  |
| DD69   | 48.522324  | 550.58026  | 125.12881  | 239.53926  | 1321.4315  | 217.41365  | 16.524069  | 50.59814   | 11.139304  |
| DD68   | 52.41509   | 118.17535  | 159.24556  | 270.76437  | 927.62054  | 454.40854  | 2.710515   | 18.244192  | 14.070906  |
| DD25   | 177.12527  | 299.0591   | 74.61493   | 179.00731  | 1420.5573  | 248.00615  | 4.760147   | 47.245438  | 0.7664423  |
| DD28   | 53.967575  | 320.5947   | 99.049065  | 308.2658   | 2360.937   | 205.08984  | 17.852877  | 43.167473  | 12.717099  |
| DD29   | 64.80777   | 168.95581  | 120.24014  | 399.72372  | 897.0009   | 377.0392   | 7.3253274  | 14.614822  | 9.125371   |
| DD27   | 59.22256   | 356.3679   | 83.86282   | 253.46297  | 2346.218   | 33.39103   | 8.470436   | 76.915306  | 10.613187  |
| DD30   | 56.14144   | 280.30157  | 135.40294  | 195.87833  | 944.0307   | 234.50526  | 18.766024  | 35.9456    | 9.290639   |

## Cont'd Supplementary Table 2

| Animal | 1386466_at | 1385892_at | 1385871_at | 1385673_at | 1385465_at | 1385439_x_ | 1385275_at | 1385099_at | 1385014_at |
|--------|------------|------------|------------|------------|------------|------------|------------|------------|------------|
| DD81   | 8.27227    | 3.6542659  | 266.5153   | 132.99258  | 13.24997   | 25.175446  | 2.017476   | 28.366693  | 15.616269  |
| DD84   | 9.247117   | 5.34661    | 250.00153  | 89.78306   | 3.3275185  | 19.68119   | 1.0925738  | 32.789673  | 26.221025  |
| DD85   | 18.096539  | 13.472178  | 313.7183   | 119.68646  | 14.300623  | 22.832104  | 13.439942  | 28.618862  | 28.631834  |
| DD86   | 21.5766    | 4.027728   | 207.54892  | 118.73031  | 4.546651   | 21.275476  | 24.727356  | 35.285282  | 21.252249  |
| DD83   | 12.867025  | 17.546345  | 228.73291  | 104.38665  | 5.134623   | 7.262439   | 21.847757  | 35.663807  | 33.228382  |
| DD41   | 0.999185   | 22.39835   | 403.62582  | 90.37086   | 13.517018  | 22.602983  | 7.0969954  | 14.786743  | 36.631325  |
| DD42   | 9.105811   | 15.010064  | 351.14493  | 130.42273  | 0.5149312  | 12.839351  | 3.4799385  | 17.319065  | 22.96632   |
| DD43   | 7.7116756  | 23.925499  | 854.6445   | 83.774185  | 3.552819   | 11.332837  | 7.872331   | 8.717582   | 37.37928   |
| DD44   | 11.794233  | 2.0800214  | 351.0572   | 124.22462  | 12.355002  | 24.96344   | 2.145415   | 12.73654   | 20.14257   |
| DD87   | 4.8118896  | 20.065397  | 350.56558  | 117.9884   | 1.2285473  | 25.235765  | 5.9094505  | 9.561946   | 31.7223    |
| DD2    | 6.0717473  | 3.669002   | 218.04314  | 42.19737   | 5.1321735  | 15.343077  | 4.2016087  | 9.901681   | 23.775574  |
| DD3    | 0.8508036  | 5.250383   | 409.45145  | 94.70748   | 12.412986  | 13.941172  | 3.629871   | 8.222347   | 25.118132  |
| DD89   | 6.746645   | 18.13287   | 430.07874  | 66.84148   | 2.0182793  | 28.520845  | 3.296105   | 6.9803677  | 28.696493  |
| DD90   | 9.201951   | 12.499568  | 467.37888  | 78.43567   | 15.3386    | 11.535788  | 1.699506   | 12.468288  | 33.53904   |
| DD4    | 9.83059    | 5.8408213  | 429.223    | 94.22595   | 5.025409   | 14.874879  | 7.8162417  | 13.855841  | 35.175476  |
| DD47   | 5.5195913  | 14.80583   | 254.77496  | 83.56057   | 6.3895097  | 11.297891  | 16.303747  | 0.8733157  | 32.401264  |
| DD48   | 11.28976   | 20.841915  | 514.287    | 71.44022   | 12.317014  | 7.2611628  | 9.870817   | 2.545353   | 28.811852  |
| DD49   | 15.822888  | 30.49854   | 368.9146   | 54.14153   | 12.163962  | 9.989165   | 21.36609   | 17.757704  | 39.98808   |
| DD50   | 0.4124436  | 2.5279417  | 443.7207   | 91.763885  | 13.157906  | 12.007342  | 13.501232  | 1.1158386  | 29.076643  |
| DD46   | 7.479019   | 2.9483073  | 542.1252   | 63.88325   | 13.0053    | 26.463177  | 4.2694783  | 4.9565754  | 33.581833  |
| DD6    | 12.688037  | 9.092555   | 353.8686   | 74.98458   | 8.041459   | 13.861078  | 1.4741191  | 12.672132  | 47.442066  |
| DD7    | 5.788476   | 14.777961  | 381.70096  | 75.7548    | 9.0978155  | 12.980843  | 2.2040136  | 0.8215976  | 43.59675   |
| DD8    | 17.41015   | 3.9434717  | 422.45865  | 68.91995   | 11.333844  | 16.89402   | 5.0077143  | 9.701393   | 45.29575   |
| DD5    | 7.638025   | 4.326155   | 775.9349   | 76.14117   | 12.839518  | 15.656021  | 28.23407   | 0.5506597  | 39.06077   |
| DD9    | 6.1486144  | 5.2761984  | 290.73077  | 111.92777  | 9.882821   | 21.226583  | 6.280712   | 6.864298   | 46.26542   |
| DD103  | 31.637245  | 140.19958  | 1953.0247  | 192.94943  | 20.38064   | 6.24791    | 25.557852  | 49.31736   | 42.902702  |
| DD101  | 29.30746   | 14.888172  | 1285.8553  | 210.60457  | 17.169975  | 7.0083737  | 31.012854  | 28.487804  | 17.799911  |
| DD102  | 29.05145   | 57.842712  | 1542.9471  | 178.48822  | 31.60603   | 14.729922  | 32.131615  | 25.350859  | 28.119328  |
| DD105  | 23.934847  | 26.715176  | 1556.3633  | 189.22014  | 40.394478  | 11.369782  | 21.570957  | 28.475243  | 12.725373  |
| DD106  | 31.04791   | 97.360954  | 1593.4812  | 167.17981  | 19.620815  | 17.586233  | 21.91681   | 26.740578  | 24.759144  |
| DD62   | 20.98279   | 41.888973  | 1289.8896  | 202.30936  | 17.248035  | 4.6898623  | 18.141415  | 9.903443   | 15.339567  |
| DD64   | 15.603148  | 64.02734   | 1213.5146  | 159.72774  | 47.45265   | 8.027508   | 29.69601   | 8.406822   | 6.824345   |
| DD107  | 20.40577   | 69.03564   | 1346.1047  | 136.82675  | 14.078118  | 16.13256   | 16.445065  | 0.7497203  | 6.3074822  |
| DD108  | 9.145521   | 42.935238  | 1214.8865  | 219.86252  | 26.001257  | 2.0104194  | 5.6952076  | 13.552076  | 17.376976  |
| DD63   | 12.554042  | 38.85963   | 1315.9945  | 180.40369  | 16.48019   | 13.782197  | 20.079657  | 3.594941   | 20.42602   |
| DD23   | 20.229774  | 49.298016  | 900.14514  | 58.24925   | 19.876495  | 11.423369  | 15.716049  | 7.634969   | 8.820557   |
| DD24   | 12.893889  | 46.598785  | 980.62427  | 157.73875  | 11.779074  | 9.377708   | 34.03619   | 5.162764   | 10.697087  |
| DD110  | 13.389256  | 56.85902   | 1082.88    | 194.21121  | 6.3986754  | 10.495355  | 21.386606  | 1.3579822  | 3.5655506  |
| DD22   | 11.552226  | 10.536459  | 874.75037  | 165.62369  | 27.120316  | 14.420894  | 35.330547  | 0.7524338  | 6.646819   |
| DD109  | 12.704022  | 69.55971   | 829.4668   | 147.27898  | 40.405663  | 19.693193  | 28.788134  | 1.4267328  | 20.421537  |
| DD65   | 14.683143  | 156.19086  | 1422.9803  | 162.9504   | 28.094585  | 12.661615  | 53.288918  | 1.7364323  | 8.046208   |
| DD66   | 7.9832435  | 40.7118    | 889.19025  | 197.97316  | 17.35452   | 13.180956  | 25.559195  | 0.6740143  | 16.463638  |
| DD67   | 21.008862  | 66.38657   | 1215.464   | 91.27641   | 34.204678  | 9.849395   | 17.175953  | 0.4396039  | 13.440404  |
| DD69   | 2.7305079  | 77.52123   | 1099.6083  | 115.56054  | 30.009829  | 18.670412  | 26.213276  | 1.0220337  | 15.953603  |
| DD68   | 15.664359  | 90.78357   | 998.0904   | 165.975    | 15.841172  | 14.223655  | 21.69811   | 3.4262094  | 15.048092  |
| DD25   | 11.669148  | 126.29895  | 952.88354  | 56.168736  | 38.455803  | 3.9037693  | 26.267855  | 0.4486457  | 15.846904  |
| DD28   | 10.235241  | 114.79253  | 1005.0436  | 163.05531  | 21.390015  | 13.8947    | 19.089825  | 7.547912   | 11.231545  |
| DD29   | 11.311367  | 132.5015   | 1034.2552  | 219.52698  | 35.4517    | 12.496722  | 43.445816  | 5.9458313  | 13.830802  |
| DD27   | 1.9491961  | 64.469505  | 855.6417   | 77.85346   | 29.376894  | 5.6659446  | 24.602741  | 3.3928885  | 13.094369  |
| DD30   | 14.47783   | 159.47072  | 1211.6428  | 187.39427  | 13.27686   | 6.5979204  | 18.955914  | 3.3412633  | 25.876425  |

## Cont'd Supplementary Table 2

| Animal | 1384888_at | 1384794_at | 1384717_at | 1384575_at | 1384345_at | 1384309_at | 1384272_at | 1384254_at |
|--------|------------|------------|------------|------------|------------|------------|------------|------------|
| DD81   | 24.026936  | 15.492188  | 178.98253  | 62.861088  | 86.31304   | 132.25174  | 25.707644  | 547.4547   |
| DD84   | 18.797281  | 10.314635  | 282.3522   | 58.194775  | 137.30392  | 181.72328  | 20.740532  | 811.0122   |
| DD85   | 35.75517   | 9.099075   | 238.92485  | 63.138718  | 116.46867  | 144.2473   | 28.968018  | 494.10825  |
| DD86   | 20.735888  | 16.815187  | 228.58864  | 70.17242   | 141.98468  | 156.80536  | 24.538406  | 642.00165  |
| DD83   | 26.806265  | 15.957464  | 213.20844  | 57.288334  | 117.19072  | 153.19853  | 15.733827  | 1107.8873  |
| DD41   | 32.82178   | 13.078794  | 129.2085   | 57.89448   | 192.15001  | 162.66702  | 37.3393    | 588.9871   |
| DD42   | 43.998653  | 6.6476393  | 134.23077  | 87.9407    | 168.41714  | 173.41539  | 25.191763  | 1394.5961  |
| DD43   | 34.150703  | 23.094168  | 141.05443  | 84.0182    | 211.05101  | 179.77734  | 31.805643  | 902.92255  |
| DD44   | 43.550285  | 14.240407  | 188.0859   | 50.64435   | 201.12686  | 167.96858  | 27.949629  | 1069.5227  |
| DD87   | 30.784424  | 19.074883  | 160.8464   | 59.2263    | 179.58151  | 144.1147   | 19.232946  | 1129.1978  |
| DD2    | 28.176462  | 22.242077  | 167.53874  | 66.052666  | 111.18767  | 146.56616  | 13.969179  | 1389.8964  |
| DD3    | 26.265795  | 19.627354  | 163.69487  | 72.86529   | 140.56915  | 191.3519   | 36.694046  | 626.3764   |
| DD89   | 28.732323  | 23.83799   | 174.5121   | 35.42119   | 118.98881  | 193.93857  | 28.903349  | 747.29755  |
| DD90   | 23.751446  | 25.162012  | 136.82184  | 71.44896   | 95.75405   | 169.56476  | 35.493904  | 530.70166  |
| DD4    | 19.263462  | 16.590109  | 136.1275   | 52.89189   | 118.39999  | 179.69478  | 34.42222   | 1078.2566  |
| DD47   | 22.190935  | 3.9606483  | 116.05685  | 52.590946  | 78.601234  | 199.42761  | 38.695248  | 479.38922  |
| DD48   | 26.405472  | 28.119585  | 101.16818  | 69.18508   | 225.3219   | 196.77159  | 27.292202  | 1023.6996  |
| DD49   | 18.209642  | 12.679705  | 170.4989   | 48.947456  | 69.862564  | 212.17435  | 20.484383  | 478.3971   |
| DD50   | 18.029345  | 22.634846  | 127.91934  | 60.004494  | 122.39093  | 208.09879  | 34.39658   | 728.41315  |
| DD46   | 38.122353  | 24.576479  | 177.30171  | 66.21847   | 95.57258   | 186.04259  | 36.280804  | 697.8893   |
| DD6    | 25.905155  | 16.43067   | 137.58353  | 60.705128  | 149.01274  | 216.40195  | 36.770077  | 252.50993  |
| DD7    | 14.206973  | 17.867203  | 135.07515  | 53.423832  | 109.25719  | 195.28886  | 57.312645  | 530.6876   |
| DD8    | 32.330544  | 17.225325  | 144.75008  | 77.38465   | 95.10516   | 181.35321  | 38.41182   | 348.4101   |
| DD5    | 20.693886  | 17.946215  | 129.68953  | 56.030334  | 203.08066  | 210.53563  | 36.07084   | 262.67834  |
| DD9    | 28.407377  | 19.095798  | 175.52151  | 67.87819   | 99.44423   | 200.92009  | 41.45737   | 402.76642  |
| DD103  | 29.412987  | 70.81213   | 18.963842  | 136.23357  | 270.75812  | 18.500599  | 25.373404  | 402.99124  |
| DD101  | 18.95122   | 32.40319   | 23.478952  | 130.6595   | 453.80487  | 69.12038   | 25.206394  | 250.29439  |
| DD102  | 29.400421  | 62.3115    | 144.54222  | 85.1947    | 262.36926  | 29.097864  | 27.424904  | 768.47406  |
| DD105  | 35.439686  | 60.711807  | 26.204407  | 118.89671  | 246.20746  | 59.36563   | 23.150803  | 287.36316  |
| DD106  | 26.598124  | 35.77839   | 150.24594  | 134.77126  | 316.57263  | 141.09053  | 30.400139  | 255.03134  |
| DD62   | 39.112164  | 46.036434  | 184.08154  | 102.61781  | 478.39072  | 154.42488  | 51.907738  | 908.63367  |
| DD64   | 39.067196  | 41.938423  | 12.377163  | 148.03232  | 540.4462   | 37.11259   | 50.855713  | 981.1866   |
| DD107  | 35.068848  | 37.337467  | 166.20988  | 120.54608  | 267.94284  | 72.03311   | 38.573845  | 368.8876   |
| DD108  | 37.621357  | 36.50105   | 17.049639  | 185.54968  | 245.87407  | 68.65149   | 35.182137  | 391.74744  |
| DD63   | 43.050148  | 52.64746   | 103.58765  | 116.34808  | 524.9134   | 83.44017   | 42.350544  | 512.28784  |
| DD23   | 3.708741   | 42.924     | 75.91299   | 115.19338  | 170.92436  | 36.680557  | 134.00304  | 597.4573   |
| DD24   | 25.745283  | 46.647232  | 11.778296  | 130.9109   | 175.34358  | 103.43208  | 88.85901   | 1168.0037  |
| DD110  | 32.7364    | 36.319054  | 29.419748  | 164.48366  | 332.72775  | 88.76652   | 86.574196  | 954.26337  |
| DD22   | 4.116732   | 27.005632  | 19.832203  | 163.23174  | 273.36545  | 115.9033   | 43.446106  | 685.2592   |
| DD109  | 35.021618  | 32.483677  | 17.242687  | 99.92253   | 255.78099  | 118.90799  | 118.81394  | 405.38748  |
| DD65   | 22.78898   | 18.734737  | 74.42842   | 113.93047  | 234.41237  | 198.70718  | 77.27457   | 306.46768  |
| DD66   | 17.80748   | 31.740698  | 93.26184   | 117.35365  | 230.97101  | 104.983    | 123.51173  | 323.26538  |
| DD67   | 26.994787  | 53.22839   | 32.698967  | 87.40312   | 399.28296  | 24.994238  | 59.367718  | 374.4345   |
| DD69   | 19.099518  | 56.70048   | 20.915937  | 139.35992  | 248.36716  | 37.914375  | 77.44558   | 328.9782   |
| DD68   | 1.0205556  | 33.653915  | 90.52741   | 101.72198  | 271.9468   | 28.779491  | 194.68703  | 539.6869   |
| DD25   | 9.970726   | 23.916105  | 55.9229    | 106.67875  | 134.81128  | 40.350643  | 146.86002  | 290.26666  |
| DD28   | 14.497183  | 42.6662    | 89.57291   | 121.13156  | 321.20798  | 102.437    | 85.14528   | 601.9244   |
| DD29   | 24.749994  | 39.739132  | 74.686516  | 167.85628  | 298.07153  | 124.97701  | 222.1313   | 489.03595  |
| DD27   | 20.73769   | 60.930435  | 71.36422   | 149.88516  | 104.07052  | 102.65167  | 106.60384  | 609.0186   |
| DD30   | 4.650075   | 56.58649   | 114.13358  | 121.49457  | 235.8009   | 23.52199   | 142.59837  | 390.5277   |

**Supplementary Table 2: Raw Intensities of Individual Differentially Regulated Probe Sets**

| Animal | Strain | Age    | 1384143_at | 1384104_at | 1384058_at | 1383977_a_ | 1383923_at | 1383864_at | 1383814_at |
|--------|--------|--------|------------|------------|------------|------------|------------|------------|------------|
|        |        | (Week) |            |            |            |            |            |            |            |
| DD81   | GK     | 4      | 42.400173  | 1.0075545  | 112.02165  | 87.60353   | 3.3339305  | 1.7060596  | 70.030655  |
| DD84   | GK     | 4      | 36.941948  | 8.542041   | 85.312416  | 106.28809  | 9.834204   | 11.975027  | 64.75046   |
| DD85   | GK     | 4      | 56.97346   | 2.1552975  | 91.359146  | 90.73347   | 1.6157724  | 3.2228272  | 66.1974    |
| DD86   | GK     | 4      | 26.303776  | 0.4414047  | 97.61215   | 103.01849  | 15.108046  | 3.1007402  | 61.563576  |
| DD83   | GK     | 4      | 42.97218   | 2.2008133  | 69.95659   | 114.09537  | 3.3497925  | 8.570048   | 85.920135  |
| DD41   | GK     | 8      | 31.702625  | 0.5946093  | 59.59038   | 97.23428   | 11.682566  | 0.5801064  | 56.00367   |
| DD42   | GK     | 8      | 54.42713   | 0.6943286  | 63.004326  | 56.42439   | 17.678988  | 11.495832  | 53.772495  |
| DD43   | GK     | 8      | 40.674953  | 14.183979  | 46.66582   | 107.8726   | 1.5852394  | 10.78334   | 43.2607    |
| DD44   | GK     | 8      | 42.126904  | 3.9988286  | 50.119125  | 104.39722  | 6.835534   | 5.978614   | 33.50617   |
| DD87   | GK     | 8      | 38.39489   | 3.1653466  | 72.62763   | 99.3073    | 2.7143922  | 1.7040752  | 54.73573   |
| DD2    | GK     | 12     | 35.322     | 7.558259   | 75.149635  | 96.829956  | 1.6549914  | 11.525789  | 59.037144  |
| DD3    | GK     | 12     | 46.39112   | 6.052285   | 69.720726  | 125.92971  | 3.0755117  | 10.520287  | 54.644028  |
| DD89   | GK     | 12     | 27.33614   | 0.8150765  | 47.771755  | 137.01884  | 5.0286903  | 14.596847  | 50.41076   |
| DD90   | GK     | 12     | 39.540054  | 2.9140265  | 80.85192   | 104.5341   | 4.344186   | 0.7458201  | 46.77495   |
| DD4    | GK     | 12     | 32.143177  | 4.300901   | 70.25696   | 143.74585  | 13.957186  | 1.4573787  | 42.825573  |
| DD47   | GK     | 16     | 16.953579  | 4.026743   | 37.61952   | 105.98669  | 4.0041046  | 3.4277158  | 41.42106   |
| DD48   | GK     | 16     | 14.068182  | 5.524368   | 32.184574  | 128.76622  | 14.085961  | 11.488524  | 45.185936  |
| DD49   | GK     | 16     | 38.67004   | 3.4032464  | 80.75212   | 174.39964  | 3.8765907  | 6.1126304  | 61.079777  |
| DD50   | GK     | 16     | 27.540058  | 10.122782  | 60.122295  | 141.475    | 5.492476   | 0.8358386  | 38.11748   |
| DD46   | GK     | 16     | 31.830154  | 1.3410727  | 79.314354  | 137.49121  | 3.0883493  | 1.8092433  | 58.853676  |
| DD6    | GK     | 20     | 20.14419   | 8.307265   | 65.969475  | 148.66435  | 15.124054  | 8.354349   | 55.5754    |
| DD7    | GK     | 20     | 31.392294  | 4.56193    | 50.715355  | 103.20783  | 10.395995  | 17.317049  | 47.919968  |
| DD8    | GK     | 20     | 26.146694  | 4.6214843  | 68.09406   | 203.41795  | 3.1251822  | 12.529152  | 44.960907  |
| DD5    | GK     | 20     | 31.852242  | 4.7813478  | 26.407446  | 129.08527  | 4.563296   | 7.1292624  | 47.832127  |
| DD9    | GK     | 20     | 34.850594  | 0.2241772  | 65.45629   | 142.77438  | 4.7144938  | 5.9867864  | 74.87506   |
| DD103  | WKY    | 4      | 10.421473  | 12.997425  | 14.186603  | 75.59699   | 29.415243  | 23.544933  | 118.19926  |
| DD101  | WKY    | 4      | 26.18589   | 9.64882    | 9.814407   | 51.4977    | 22.38415   | 20.485634  | 100.53893  |
| DD102  | WKY    | 4      | 27.923346  | 18.108353  | 19.181475  | 44.109783  | 26.148323  | 22.305845  | 123.64206  |
| DD105  | WKY    | 4      | 11.974647  | 18.08612   | 10.145396  | 53.81379   | 12.732445  | 13.153798  | 131.88084  |
| DD106  | WKY    | 4      | 31.00227   | 15.072882  | 12.960036  | 60.62002   | 30.327778  | 22.14846   | 100.66356  |
| DD62   | WKY    | 8      | 7.25581    | 10.831085  | 15.940562  | 27.554676  | 5.1021304  | 22.121115  | 111.51138  |
| DD64   | WKY    | 8      | 33.749603  | 12.5902    | 17.626032  | 15.746892  | 26.956785  | 20.16789   | 64.07699   |
| DD107  | WKY    | 8      | 27.586134  | 25.235125  | 4.1256313  | 43.068     | 37.953247  | 14.908001  | 138.00111  |
| DD108  | WKY    | 8      | 27.337193  | 15.405048  | 4.552876   | 19.93094   | 18.008434  | 13.501053  | 165.49355  |
| DD63   | WKY    | 8      | 20.582916  | 24.435406  | 12.88292   | 49.520554  | 10.785878  | 12.487666  | 113.1647   |
| DD23   | WKY    | 12     | 2.9577005  | 14.159929  | 8.100425   | 35.970993  | 1.5246834  | 2.3022697  | 102.61748  |
| DD24   | WKY    | 12     | 16.968294  | 22.742205  | 21.596102  | 6.6503816  | 28.028505  | 13.579607  | 90.00193   |
| DD110  | WKY    | 12     | 30.368958  | 3.9625556  | 24.974524  | 37.764374  | 6.802578   | 20.306988  | 76.57114   |
| DD22   | WKY    | 12     | 22.190468  | 32.90583   | 19.153484  | 38.19888   | 33.15511   | 3.2154481  | 98.19545   |
| DD109  | WKY    | 12     | 23.278723  | 23.08541   | 13.113915  | 45.0163    | 29.449478  | 16.912783  | 90.8198    |
| DD65   | WKY    | 16     | 18.983635  | 20.353476  | 2.779742   | 52.388313  | 31.517763  | 21.907356  | 124.65096  |
| DD66   | WKY    | 16     | 25.683926  | 21.961803  | 38.029976  | 36.23119   | 24.200333  | 4.6696744  | 125.41619  |
| DD67   | WKY    | 16     | 33.557636  | 14.561807  | 13.378607  | 22.980955  | 16.271341  | 14.840266  | 102.39231  |
| DD69   | WKY    | 16     | 18.397469  | 12.447209  | 10.144868  | 42.304096  | 46.4153    | 1.202303   | 119.80107  |
| DD68   | WKY    | 16     | 32.223743  | 25.1743    | 14.150769  | 26.555153  | 66.414894  | 23.79331   | 97.15365   |
| DD25   | WKY    | 20     | 20.811039  | 36.03555   | 42.578224  | 36.929054  | 27.838575  | 4.7070494  | 118.83539  |
| DD28   | WKY    | 20     | 13.721203  | 24.548908  | 9.645631   | 27.977186  | 62.3245    | 21.41577   | 97.18639   |
| DD29   | WKY    | 20     | 2.9217978  | 15.69453   | 9.596177   | 48.273438  | 53.19948   | 8.265737   | 93.2736    |
| DD27   | WKY    | 20     | 21.404432  | 16.062876  | 22.391521  | 41.1738    | 40.032845  | 1.6768658  | 92.730156  |
| DD30   | WKY    | 20     | 22.902954  | 27.68624   | 13.428181  | 53.364403  | 59.597862  | 15.25042   | 143.01675  |

## Cont'd Supplementary Table 2

| Animal | 1383644_at | 1383608_at | 1383577_at | 1383510_at | 1383449_at | 1383117_at | 1383108_at | 1383058_at | 1382987_at |
|--------|------------|------------|------------|------------|------------|------------|------------|------------|------------|
| DD81   | 192.35262  | 107.66954  | 269.02005  | 804.64215  | 1.2579612  | 289.1985   | 551.0575   | 142.4368   | 4.9788175  |
| DD84   | 204.32199  | 445.40912  | 282.3133   | 836.3146   | 10.147043  | 258.0084   | 553.8446   | 180.14928  | 6.5602813  |
| DD85   | 212.5994   | 461.8424   | 302.31778  | 1018.7146  | 10.035492  | 266.08084  | 468.74957  | 246.2018   | 10.553892  |
| DD86   | 170.33302  | 411.80804  | 272.56726  | 798.79565  | 6.3917775  | 279.2863   | 527.71576  | 160.10336  | 3.0925717  |
| DD83   | 145.9298   | 549.41327  | 267.64468  | 816.68555  | 9.87072    | 237.35411  | 519.09406  | 173.13377  | 3.162887   |
| DD41   | 292.12485  | 70.35477   | 336.87723  | 1376.6525  | 7.1976223  | 236.67947  | 549.5973   | 235.85687  | 15.445454  |
| DD42   | 173.99716  | 118.99105  | 318.85388  | 1278.7242  | 22.88137   | 259.07892  | 557.2477   | 210.48543  | 13.846141  |
| DD43   | 301.64078  | 275.98572  | 321.67142  | 573.611    | 19.228342  | 244.65623  | 878.2536   | 163.10455  | 3.4973733  |
| DD44   | 254.91566  | 119.34116  | 286.51968  | 1059.2314  | 8.723257   | 240.96014  | 800.0198   | 156.47914  | 2.741121   |
| DD87   | 251.69824  | 217.82382  | 318.50934  | 1213.2307  | 8.253715   | 252.29993  | 600.1507   | 267.30487  | 11.520486  |
| DD2    | 180.92607  | 417.8459   | 253.28537  | 815.1513   | 10.221038  | 297.0116   | 648.6987   | 235.0907   | 3.289927   |
| DD3    | 268.09436  | 337.30865  | 280.94296  | 801.8366   | 7.035753   | 290.86295  | 580.2457   | 259.05673  | 2.2337615  |
| DD89   | 260.72952  | 127.12192  | 256.56772  | 775.1402   | 20.238504  | 306.1589   | 601.8695   | 204.44199  | 12.898427  |
| DD90   | 280.30933  | 74.55218   | 304.801    | 776.93066  | 16.177944  | 303.87076  | 622.0148   | 239.05185  | 2.3980587  |
| DD4    | 223.1356   | 75.55527   | 255.88039  | 694.36176  | 17.550562  | 362.21487  | 575.43933  | 227.40764  | 8.377557   |
| DD47   | 223.8701   | 60.858353  | 231.38802  | 883.7235   | 5.024888   | 433.6221   | 567.0097   | 318.70645  | 0.9905227  |
| DD48   | 161.56314  | 109.86819  | 243.86232  | 267.0928   | 18.713223  | 206.35056  | 928.35266  | 315.24994  | 5.6933527  |
| DD49   | 265.00974  | 209.63922  | 299.01498  | 1186.8694  | 6.191923   | 510.7113   | 480.3996   | 287.22873  | 19.86081   |
| DD50   | 172.37392  | 58.624825  | 290.89243  | 513.09283  | 2.4746704  | 378.84366  | 512.5295   | 275.94318  | 5.2038484  |
| DD46   | 256.08984  | 137.92429  | 291.6993   | 702.56384  | 15.449437  | 282.65314  | 605.4812   | 291.67154  | 23.195662  |
| DD6    | 293.93463  | 235.42566  | 296.44128  | 974.7701   | 11.136921  | 439.70148  | 486.2915   | 348.3177   | 4.4208994  |
| DD7    | 295.46817  | 75.74874   | 324.16385  | 1118.6321  | 8.745277   | 280.68793  | 479.75464  | 280.35452  | 4.1443486  |
| DD8    | 329.6156   | 106.6397   | 322.73755  | 1084.6624  | 5.7152133  | 346.17245  | 469.4864   | 398.4942   | 5.1836257  |
| DD5    | 261.71848  | 73.56742   | 319.10947  | 615.6626   | 9.458441   | 251.07384  | 871.6436   | 276.52777  | 13.112964  |
| DD9    | 215.64388  | 126.33968  | 293.85797  | 1048.9468  | 16.728468  | 323.5003   | 481.80304  | 342.67224  | 4.8750496  |
| DD103  | 151.18315  | 76.24704   | 225.1838   | 53.337204  | 62.001408  | 42.213768  | 221.02396  | 583.8742   | 62.180317  |
| DD101  | 163.7639   | 49.210815  | 120.98193  | 30.845572  | 36.8034    | 55.66472   | 302.41733  | 684.3977   | 45.740036  |
| DD102  | 120.51266  | 88.39014   | 152.93616  | 52.083595  | 68.06414   | 54.923405  | 292.8505   | 620.7615   | 50.567226  |
| DD105  | 111.97311  | 84.13082   | 144.55144  | 47.415794  | 50.406754  | 45.7848    | 298.9248   | 496.72018  | 44.741356  |
| DD106  | 175.41545  | 57.183346  | 87.6106    | 50.83558   | 50.836388  | 51.045853  | 248.02931  | 686.1406   | 46.349556  |
| DD62   | 129.17226  | 35.91853   | 88.39431   | 36.307278  | 48.61774   | 52.27422   | 257.05878  | 506.09427  | 24.469625  |
| DD64   | 165.88936  | 58.82012   | 55.591564  | 42.255253  | 36.54183   | 63.161327  | 311.89127  | 602.31     | 7.1211057  |
| DD107  | 160.26721  | 60.02105   | 150.49457  | 36.3134    | 46.834007  | 61.898586  | 249.87445  | 475.04327  | 7.0194993  |
| DD108  | 88.206665  | 36.077713  | 145.83458  | 33.128864  | 44.256916  | 47.42655   | 228.98691  | 642.25244  | 34.39549   |
| DD63   | 176.1401   | 66.857346  | 87.04483   | 36.493793  | 46.324566  | 51.71503   | 296.39072  | 554.9705   | 18.35321   |
| DD23   | 125.02216  | 214.68193  | 109.53241  | 31.563396  | 51.922478  | 52.848896  | 190.13052  | 539.0458   | 23.940228  |
| DD24   | 117.3151   | 59.522106  | 100.34292  | 75.126854  | 31.188206  | 69.99222   | 208.3746   | 612.73456  | 30.991465  |
| DD110  | 59.489338  | 75.0153    | 99.42396   | 33.906628  | 27.719133  | 64.9585    | 335.70074  | 693.27606  | 5.037539   |
| DD22   | 100.74454  | 76.279274  | 95.63061   | 46.673473  | 37.081028  | 54.6903    | 303.6577   | 485.41254  | 26.224493  |
| DD109  | 139.51569  | 104.67456  | 85.026794  | 57.474396  | 48.89209   | 55.935192  | 287.87457  | 695.6395   | 20.585747  |
| DD65   | 104.91683  | 104.26742  | 126.33743  | 81.86693   | 75.36831   | 64.50961   | 133.46707  | 929.26324  | 53.792725  |
| DD66   | 68.597336  | 67.45848   | 179.7895   | 38.04349   | 33.27428   | 62.10798   | 225.14867  | 832.5031   | 25.5839    |
| DD67   | 190.3379   | 49.86847   | 117.72257  | 50.36309   | 46.156376  | 48.058155  | 351.4989   | 972.34033  | 22.959356  |
| DD69   | 100.76147  | 91.75484   | 77.616295  | 40.370853  | 62.88868   | 81.18184   | 248.80424  | 837.33923  | 23.473324  |
| DD68   | 82.72961   | 57.23379   | 84.34221   | 547.9755   | 79.0947    | 47.11005   | 238.04912  | 737.6902   | 24.2951    |
| DD25   | 86.93552   | 106.40064  | 50.24512   | 48.20236   | 40.555195  | 69.9372    | 157.7385   | 974.2712   | 14.366949  |
| DD28   | 56.352867  | 91.990776  | 77.727516  | 53.17643   | 41.37642   | 39.208782  | 211.24081  | 887.4932   | 8.841964   |
| DD29   | 64.71165   | 76.286835  | 99.13914   | 81.081154  | 76.52189   | 50.63567   | 192.57724  | 837.7299   | 21.96259   |
| DD27   | 31.636986  | 107.49628  | 49.65488   | 66.18571   | 19.531338  | 50.31611   | 184.28188  | 750.8127   | 17.62962   |
| DD30   | 84.36792   | 147.81587  | 110.86754  | 79.935555  | 19.060888  | 59.61524   | 133.83765  | 1319.1381  | 22.349545  |

## Cont'd Supplementary Table 2

| Animal | 1382956_at | 1382926_s_ | 1382774_at | 1382702_at | 1382648_at | 1382524_at | 1382497_at | 1382462_at | 1382431_at |
|--------|------------|------------|------------|------------|------------|------------|------------|------------|------------|
| DD81   | 35.063576  | 7.857396   | 27.47941   | 11.548236  | 6.8257675  | 5.706013   | 95.25518   | 184.35228  | 126.76947  |
| DD84   | 40.326885  | 0.9680882  | 54.492302  | 17.064358  | 7.809027   | 3.8366344  | 90.16978   | 177.36589  | 88.68602   |
| DD85   | 37.2398    | 1.7305804  | 45.1825    | 10.708047  | 5.9112506  | 19.378325  | 72.73294   | 154.84     | 88.94344   |
| DD86   | 26.002134  | 9.675671   | 38.787277  | 3.3253355  | 11.772416  | 7.058975   | 64.01766   | 152.11441  | 99.92707   |
| DD83   | 38.87144   | 2.030083   | 45.5796    | 2.2859058  | 13.38228   | 19.270414  | 75.98677   | 170.82521  | 88.589905  |
| DD41   | 32.016453  | 13.294463  | 18.504322  | 4.8127446  | 14.945236  | 44.322926  | 139.59889  | 137.57532  | 86.68892   |
| DD42   | 31.185356  | 6.7372293  | 3.7779543  | 5.4505835  | 19.490356  | 43.027058  | 200.90688  | 163.89565  | 91.79999   |
| DD43   | 36.23159   | 6.6200905  | 30.204943  | 16.687948  | 6.5292683  | 66.3118    | 63.05565   | 117.66302  | 92.056     |
| DD44   | 24.69547   | 2.1245656  | 26.301994  | 5.129609   | 12.69703   | 38.356255  | 92.14154   | 139.35815  | 88.407074  |
| DD87   | 28.042255  | 10.063109  | 11.025432  | 21.59598   | 11.880837  | 37.866142  | 181.05927  | 131.03764  | 87.5526    |
| DD2    | 30.099403  | 2.3423388  | 2.724749   | 10.921476  | 12.965872  | 15.295978  | 129.42188  | 136.44308  | 80.702995  |
| DD3    | 29.802677  | 6.7007008  | 19.594917  | 18.992746  | 17.144493  | 25.293917  | 91.71025   | 116.41023  | 95.42485   |
| DD89   | 29.74023   | 11.649771  | 22.316637  | 22.50809   | 15.487211  | 35.61184   | 88.67261   | 141.10115  | 118.72528  |
| DD90   | 36.23055   | 10.985627  | 9.724568   | 3.337206   | 16.116095  | 28.081585  | 88.0836    | 157.55853  | 124.16985  |
| DD4    | 38.519592  | 17.565222  | 25.651499  | 31.847218  | 27.25071   | 22.526865  | 113.52188  | 143.76372  | 100.26927  |
| DD47   | 32.84473   | 10.644638  | 5.728307   | 22.320303  | 18.05324   | 16.351149  | 73.67297   | 174.63396  | 109.19236  |
| DD48   | 24.808153  | 4.0527587  | 1.0091921  | 11.666238  | 2.0482907  | 82.34872   | 79.89517   | 163.10542  | 65.27638   |
| DD49   | 28.485422  | 0.8951096  | 22.515097  | 4.785862   | 16.778086  | 19.201262  | 110.9352   | 197.988    | 112.02136  |
| DD50   | 23.157028  | 7.18846    | 19.066761  | 4.479077   | 20.408895  | 32.071335  | 73.12381   | 141.63962  | 116.70567  |
| DD46   | 28.129639  | 8.135168   | 11.030152  | 2.3868024  | 25.232466  | 25.898897  | 64.62414   | 138.97475  | 109.34772  |
| DD6    | 16.824224  | 8.128437   | 19.091137  | 44.190117  | 15.873497  | 34.444096  | 54.281815  | 162.20549  | 99.52934   |
| DD7    | 32.777847  | 13.49156   | 19.378912  | 17.67163   | 25.844275  | 31.07465   | 120.02615  | 151.99286  | 70.9487    |
| DD8    | 31.9458    | 10.833911  | 24.622932  | 5.2394376  | 16.24447   | 26.089495  | 115.93084  | 206.05305  | 118.51095  |
| DD5    | 18.308825  | 2.1115706  | 4.8315015  | 39.358612  | 11.517187  | 51.5768    | 30.377298  | 108.17854  | 104.69009  |
| DD9    | 27.213863  | 2.954585   | 4.306071   | 18.320501  | 25.668564  | 12.652722  | 100.91921  | 157.23538  | 87.97951   |
| DD103  | 13.914756  | 28.913593  | 63.758747  | 45.777916  | 10.722536  | 125.78758  | 333.10605  | 52.37282   | 21.193111  |
| DD101  | 31.064766  | 40.43667   | 51.518642  | 4.60353    | 7.253264   | 127.10687  | 220.22006  | 71.39795   | 27.908005  |
| DD102  | 28.017742  | 48.78961   | 22.787762  | 65.58144   | 16.108149  | 159.8049   | 387.3714   | 38.293716  | 29.173615  |
| DD105  | 25.319708  | 23.371784  | 38.89232   | 16.175632  | 10.878201  | 150.35014  | 220.32794  | 49.659824  | 27.88132   |
| DD106  | 14.261903  | 58.67858   | 50.80689   | 1.8701718  | 15.344419  | 250.45784  | 193.6474   | 83.573944  | 20.924818  |
| DD62   | 6.170028   | 41.8575    | 27.480024  | 42.475616  | 1.1551813  | 79.66912   | 193.16109  | 59.57672   | 21.880028  |
| DD64   | 8.668622   | 76.5729    | 1.3660228  | 27.368984  | 2.0645382  | 48.31728   | 315.81885  | 62.095085  | 42.012302  |
| DD107  | 6.4401574  | 38.21207   | 4.939535   | 95.60446   | 2.943604   | 142.78516  | 242.90012  | 61.427425  | 35.66662   |
| DD108  | 2.422445   | 46.181328  | 3.1376195  | 89.37084   | 18.418043  | 131.54585  | 314.64905  | 70.503105  | 13.185218  |
| DD63   | 2.4464722  | 21.068405  | 1.3617303  | 28.51657   | 8.612531   | 92.17786   | 239.90222  | 79.56187   | 13.971569  |
| DD23   | 0.9789605  | 20.301298  | 21.93746   | 119.80452  | 1.4260653  | 54.579884  | 364.63098  | 69.928116  | 33.862583  |
| DD24   | 18.206036  | 47.457485  | 24.956505  | 89.59357   | 3.1929274  | 91.954025  | 318.75085  | 72.55959   | 9.236685   |
| DD110  | 15.040326  | 48.922783  | 3.6495333  | 88.256165  | 3.8599138  | 106.03542  | 242.57657  | 73.43194   | 32.760864  |
| DD22   | 16.371239  | 38.25293   | 25.451338  | 68.17786   | 16.358322  | 68.34398   | 291.77484  | 67.74944   | 30.949984  |
| DD109  | 4.0924625  | 33.527397  | 4.985814   | 37.743908  | 4.8397856  | 68.02472   | 135.33443  | 61.7575    | 25.767075  |
| DD65   | 20.890928  | 24.18139   | 24.938244  | 35.740154  | 1.6838176  | 54.639217  | 243.98318  | 71.51616   | 21.33534   |
| DD66   | 0.7194303  | 37.720036  | 3.1536236  | 63.24014   | 1.1234232  | 88.30731   | 279.84598  | 100.16586  | 49.95999   |
| DD67   | 8.455737   | 1.3204154  | 2.9108715  | 41.98646   | 1.7060367  | 61.675785  | 288.26468  | 66.01356   | 29.867477  |
| DD69   | 16.37792   | 24.725521  | 0.9205107  | 63.341686  | 8.401952   | 56.40163   | 280.488    | 115.49643  | 37.67655   |
| DD68   | 4.2295985  | 10.639702  | 1.4634458  | 91.35248   | 1.3153918  | 27.894007  | 357.8779   | 91.29948   | 33.81955   |
| DD25   | 31.800564  | 21.261576  | 7.401383   | 89.41826   | 2.585271   | 25.845522  | 176.27133  | 82.5702    | 37.97504   |
| DD28   | 9.495312   | 10.28097   | 5.921736   | 57.266953  | 1.0279471  | 36.788506  | 499.87296  | 98.12785   | 27.344095  |
| DD29   | 11.569125  | 30.59774   | 11.462394  | 125.76755  | 4.828366   | 39.460636  | 664.7675   | 70.5211    | 29.93862   |
| DD27   | 15.27863   | 12.781261  | 4.4272413  | 119.97109  | 14.521835  | 16.12093   | 467.68753  | 90.66309   | 35.88581   |
| DD30   | 10.751603  | 1.3515772  | 8.020417   | 117.05956  | 5.583522   | 28.64218   | 364.6156   | 69.4671    | 24.861065  |

## Cont'd Supplementary Table 2

| Animal | 1382368_at | 1382308_at | 1382291_at | 1382205_at | 1382193_at | 1382089_at | 1381990_at | 1381961_at | 1381940_at |
|--------|------------|------------|------------|------------|------------|------------|------------|------------|------------|
| DD81   | 27.186861  | 161.24843  | 1.8585759  | 14.931726  | 29.838678  | 14.957028  | 91.3027    | 2.9402177  | 66.38388   |
| DD84   | 15.970592  | 167.17653  | 8.771206   | 26.022776  | 30.322575  | 22.552925  | 81.584435  | 1.0262415  | 66.06534   |
| DD85   | 28.721153  | 160.7622   | 19.203749  | 10.355501  | 29.574228  | 21.418852  | 94.329094  | 2.1486363  | 84.53106   |
| DD86   | 33.613953  | 209.18677  | 2.1175     | 18.499184  | 25.539255  | 23.696918  | 77.57563   | 0.8145278  | 80.362854  |
| DD83   | 33.95885   | 159.73343  | 9.160964   | 21.991348  | 23.601103  | 4.8022404  | 98.81257   | 0.3388261  | 72.34382   |
| DD41   | 201.81866  | 401.80417  | 4.345392   | 6.227776   | 61.943172  | 8.063577   | 160.16933  | 2.241005   | 60.696087  |
| DD42   | 182.96191  | 439.12354  | 2.6337247  | 23.406788  | 59.30471   | 0.60051    | 167.20601  | 4.841317   | 39.3106    |
| DD43   | 108.33621  | 334.13776  | 2.4786012  | 13.793022  | 54.585606  | 8.648298   | 137.9133   | 2.9548748  | 42.42369   |
| DD44   | 94.43897   | 289.38287  | 18.296713  | 11.652904  | 53.59937   | 11.043574  | 86.1638    | 11.010962  | 41.113518  |
| DD87   | 186.51917  | 426.40988  | 7.055887   | 4.599684   | 59.21244   | 12.285091  | 126.40781  | 3.4958425  | 48.80829   |
| DD2    | 136.93959  | 220.61652  | 3.7063136  | 18.813332  | 34.727993  | 18.199894  | 115.60058  | 1.0339489  | 40.043858  |
| DD3    | 313.8871   | 379.98373  | 5.920729   | 20.5467    | 62.04714   | 3.699629   | 154.86166  | 0.528587   | 46.21494   |
| DD89   | 363.40106  | 653.5405   | 24.061483  | 15.329915  | 117.42518  | 12.337255  | 163.5577   | 0.9249719  | 43.187943  |
| DD90   | 322.6424   | 578.4482   | 19.234686  | 17.634937  | 101.93747  | 8.69155    | 163.05965  | 11.068491  | 58.73291   |
| DD4    | 279.10504  | 449.25058  | 13.998525  | 18.022522  | 74.95764   | 8.515762   | 139.25247  | 2.715522   | 24.704344  |
| DD47   | 146.10698  | 439.34824  | 12.196534  | 23.915302  | 51.644993  | 7.2515564  | 114.63     | 8.316362   | 53.209312  |
| DD48   | 48.17919   | 355.73074  | 2.739259   | 18.509436  | 54.120705  | 14.448853  | 97.88936   | 0.3458718  | 33.27085   |
| DD49   | 314.25964  | 388.58197  | 26.045555  | 20.33266   | 46.81584   | 1.7293062  | 216.64043  | 1.0855998  | 45.839806  |
| DD50   | 180.97711  | 354.84427  | 14.049758  | 16.411697  | 86.08603   | 6.2160416  | 132.45093  | 3.428164   | 42.429504  |
| DD46   | 282.65967  | 425.70554  | 12.154169  | 26.838734  | 91.14964   | 4.0119224  | 182.54619  | 0.808123   | 34.97578   |
| DD6    | 417.15326  | 259.1633   | 16.610802  | 24.189116  | 49.572826  | 12.224498  | 195.15285  | 0.1388132  | 52.2841    |
| DD7    | 428.0885   | 304.356    | 21.972137  | 10.807868  | 49.754356  | 1.3437645  | 223.77286  | 0.2207025  | 48.43538   |
| DD8    | 370.64597  | 283.03842  | 13.230759  | 16.679613  | 54.72599   | 8.143298   | 235.78891  | 8.995236   | 55.64693   |
| DD5    | 123.22515  | 402.5736   | 0.6472377  | 12.807527  | 75.49861   | 0.8636427  | 135.23251  | 3.2262242  | 40.561665  |
| DD9    | 237.19855  | 210.7572   | 4.4596977  | 16.608175  | 33.837807  | 12.063139  | 153.97615  | 6.5643396  | 44.29784   |
| DD103  | 90.875565  | 508.0459   | 88.145645  | 57.017796  | 58.868145  | 46.577057  | 65.07684   | 7.225255   | 40.50106   |
| DD101  | 52.877415  | 730.6662   | 39.138454  | 42.254578  | 220.76912  | 32.91984   | 58.75992   | 2.2876883  | 39.639595  |
| DD102  | 81.1751    | 782.19916  | 63.806812  | 38.790977  | 67.52556   | 34.889725  | 61.530666  | 4.3956456  | 31.526237  |
| DD105  | 71.3285    | 565.00195  | 50.129124  | 39.842     | 69.15028   | 37.065094  | 72.520294  | 8.924338   | 27.318935  |
| DD106  | 141.27377  | 804.11584  | 47.89955   | 22.349817  | 222.6616   | 35.63156   | 108.17686  | 8.757634   | 28.170033  |
| DD62   | 34.55885   | 402.44193  | 37.910355  | 27.65164   | 43.43882   | 1.0024143  | 30.606102  | 8.791571   | 17.58402   |
| DD64   | 48.147865  | 638.352    | 69.68046   | 21.458649  | 32.721027  | 0.6542939  | 52.946903  | 7.3878927  | 15.8475    |
| DD107  | 149.80598  | 414.54196  | 27.00189   | 33.184807  | 66.364525  | 5.8638396  | 62.676712  | 1.5099674  | 22.367033  |
| DD108  | 57.34147   | 509.63663  | 52.18899   | 18.46046   | 52.106174  | 12.877307  | 32.172573  | 1.7539581  | 40.6921    |
| DD63   | 68.24494   | 440.78256  | 33.092274  | 32.350044  | 52.305134  | 13.802556  | 49.374413  | 8.20813    | 25.557938  |
| DD23   | 255.90343  | 1244.8793  | 36.307304  | 42.00932   | 193.07735  | 6.1963463  | 52.39381   | 1.6990726  | 14.008039  |
| DD24   | 243.08693  | 927.60754  | 16.089972  | 43.187664  | 196.42534  | 12.894723  | 59.15586   | 5.639257   | 16.340078  |
| DD110  | 76.43818   | 603.27783  | 26.573359  | 33.09175   | 155.39429  | 9.751125   | 49.680363  | 6.179554   | 20.339182  |
| DD22   | 92.85537   | 798.4094   | 53.650074  | 27.319754  | 197.99141  | 2.6852744  | 46.367786  | 4.958222   | 16.302044  |
| DD109  | 170.84732  | 742.8222   | 36.381336  | 62.922634  | 259.63074  | 7.189724   | 33.233475  | 5.8453426  | 5.926847   |
| DD65   | 288.02463  | 968.888    | 49.949272  | 35.90517   | 118.41612  | 7.165698   | 40.513294  | 2.4669378  | 21.094189  |
| DD66   | 246.82472  | 402.7715   | 38.316227  | 30.055717  | 121.42039  | 1.880137   | 58.997307  | 10.251999  | 17.471684  |
| DD67   | 216.40244  | 518.07947  | 56.12902   | 33.403297  | 164.87256  | 7.351072   | 63.005814  | 1.2116517  | 15.877821  |
| DD69   | 100.45212  | 1217.1954  | 54.252705  | 14.032105  | 153.57439  | 0.9652786  | 80.75996   | 4.2959566  | 10.890533  |
| DD68   | 418.06598  | 874.60925  | 37.972206  | 44.563656  | 156.4236   | 1.1594738  | 73.597626  | 7.9967914  | 17.819632  |
| DD25   | 48.18997   | 712.61786  | 57.414913  | 36.398907  | 141.69873  | 3.5097363  | 61.50828   | 0.2454994  | 22.478756  |
| DD28   | 136.4805   | 848.3044   | 41.16525   | 33.15481   | 41.786354  | 0.7355868  | 58.162987  | 0.2960382  | 13.207877  |
| DD29   | 86.45465   | 964.4775   | 56.189106  | 28.556423  | 189.17525  | 4.111924   | 38.250156  | 0.1960598  | 22.13464   |
| DD27   | 134.73938  | 843.8689   | 35.631115  | 58.717915  | 279.9086   | 17.119942  | 38.654144  | 14.189665  | 13.213371  |
| DD30   | 283.57834  | 1006.2027  | 81.042175  | 42.469234  | 71.74147   | 1.2845849  | 83.009315  | 0.203119   | 22.356438  |

## Cont'd Supplementary Table 2

| Animal | 1381626_at | 1381590_at | 1381508_at | 1381503_at | 1381445_at | 1381434_s_ | 1381414_at | 1381386_at | 1381218_at |
|--------|------------|------------|------------|------------|------------|------------|------------|------------|------------|
| DD81   | 35.867435  | 21.976423  | 39.402576  | 67.46505   | 90.633606  | 40.83636   | 83.61634   | 23.442722  | 14.196384  |
| DD84   | 36.735847  | 4.840971   | 24.760532  | 37.561703  | 109.44811  | 60.6822    | 59.17841   | 15.759784  | 17.342833  |
| DD85   | 39.945595  | 9.428937   | 39.767136  | 37.722775  | 109.41736  | 61.98376   | 82.54363   | 12.914235  | 8.126489   |
| DD86   | 32.726917  | 15.32942   | 45.931118  | 64.901     | 117.72643  | 51.832706  | 57.079033  | 19.366493  | 14.122318  |
| DD83   | 31.420834  | 4.1854105  | 28.72556   | 65.10773   | 117.67621  | 51.413517  | 71.97757   | 24.176481  | 18.230707  |
| DD41   | 35.01037   | 20.67299   | 31.67153   | 83.404015  | 130.4227   | 15.884881  | 105.91376  | 19.053083  | 18.787502  |
| DD42   | 28.357395  | 20.08472   | 30.889872  | 70.374115  | 111.95263  | 26.433819  | 73.33388   | 6.8124266  | 19.97009   |
| DD43   | 19.531853  | 12.120049  | 28.636108  | 36.071255  | 158.99489  | 31.05544   | 88.4419    | 13.636473  | 18.907637  |
| DD44   | 29.829079  | 18.060558  | 33.866184  | 55.34059   | 130.29999  | 35.11251   | 75.165146  | 16.295101  | 12.35027   |
| DD87   | 38.949947  | 30.554169  | 32.327587  | 67.41923   | 172.96368  | 24.926634  | 78.87052   | 16.654747  | 23.874655  |
| DD2    | 42.435936  | 30.003345  | 41.24101   | 46.449585  | 179.00648  | 5.569736   | 61.772327  | 29.211468  | 23.066948  |
| DD3    | 37.55497   | 7.2789307  | 26.798595  | 22.785797  | 278.6639   | 9.316962   | 72.20795   | 33.36412   | 25.942776  |
| DD89   | 30.064905  | 38.58876   | 23.574675  | 24.198626  | 290.94254  | 22.072193  | 97.33017   | 25.123604  | 19.35401   |
| DD90   | 40.323154  | 24.018621  | 35.468937  | 26.734003  | 335.7202   | 12.940012  | 95.62887   | 20.360594  | 17.523504  |
| DD4    | 30.247063  | 21.4643    | 12.748761  | 23.131065  | 231.98479  | 19.810911  | 78.8702    | 20.062479  | 19.362955  |
| DD47   | 36.788082  | 21.500597  | 29.323914  | 7.0256658  | 209.3776   | 8.105437   | 59.564087  | 22.024359  | 10.213404  |
| DD48   | 18.040821  | 10.746239  | 70.73651   | 47.407093  | 148.71468  | 16.92053   | 52.03648   | 8.702397   | 0.7082247  |
| DD49   | 44.840206  | 21.224535  | 33.062565  | 36.045536  | 171.06189  | 15.509467  | 71.04482   | 16.455711  | 15.013414  |
| DD50   | 32.083096  | 19.155941  | 22.343924  | 38.057785  | 196.84729  | 7.513532   | 63.752464  | 15.836309  | 10.112847  |
| DD46   | 24.552843  | 7.514098   | 29.391233  | 53.488255  | 259.65295  | 2.4626155  | 75.13605   | 15.578221  | 43.793133  |
| DD6    | 48.817135  | 16.528412  | 33.810333  | 21.089367  | 266.7786   | 17.663462  | 91.08347   | 25.878353  | 22.743647  |
| DD7    | 35.72855   | 14.234888  | 35.921223  | 26.133177  | 277.27206  | 12.087943  | 101.17542  | 31.283949  | 24.04313   |
| DD8    | 50.937317  | 12.664242  | 16.182278  | 25.388563  | 231.24612  | 25.809416  | 102.97434  | 25.990906  | 27.590105  |
| DD5    | 40.098076  | 5.8266797  | 21.051975  | 38.607807  | 259.07938  | 12.297594  | 72.78785   | 14.80619   | 14.214077  |
| DD9    | 43.250126  | 12.876318  | 34.748436  | 13.009737  | 221.12785  | 21.075611  | 86.377495  | 12.551072  | 22.075632  |
| DD103  | 23.28278   | 52.701447  | 154.88885  | 185.93321  | 406.99704  | 8.111033   | 63.80019   | 37.507114  | 55.546753  |
| DD101  | 15.503147  | 31.503962  | 190.60187  | 157.55911  | 351.21802  | 3.9199877  | 37.641132  | 70.43498   | 30.949337  |
| DD102  | 15.36533   | 66.76432   | 232.06488  | 169.51671  | 383.49307  | 39.8909    | 43.012188  | 41.34548   | 45.177307  |
| DD105  | 14.993449  | 39.93174   | 234.42836  | 163.72562  | 337.9805   | 25.13668   | 29.883266  | 40.400177  | 48.163807  |
| DD106  | 0.8894652  | 58.13359   | 152.60832  | 178.88885  | 417.76917  | 1.7290739  | 38.972237  | 39.812485  | 37.070427  |
| DD62   | 6.874009   | 26.129723  | 26.889807  | 173.03958  | 333.52393  | 3.9700954  | 32.934406  | 57.286583  | 48.87228   |
| DD64   | 2.60333    | 35.736942  | 117.41929  | 178.42664  | 237.0737   | 2.2526665  | 32.865887  | 26.812717  | 50.204494  |
| DD107  | 1.3901528  | 44.465176  | 208.14291  | 261.61594  | 371.08237  | 21.895292  | 39.757893  | 70.48685   | 63.65038   |
| DD108  | 11.101917  | 50.961052  | 94.77852   | 205.1087   | 316.5495   | 4.6586494  | 14.289582  | 54.628616  | 36.466465  |
| DD63   | 7.9812093  | 33.20307   | 176.98418  | 157.55455  | 378.5597   | 13.060902  | 27.250004  | 41.298183  | 69.391594  |
| DD23   | 3.8845253  | 49.18541   | 17.480713  | 42.82053   | 436.74704  | 1.1375022  | 32.134186  | 43.467716  | 60.547806  |
| DD24   | 11.345493  | 43.859028  | 194.60336  | 44.206375  | 304.94345  | 4.6173368  | 35.153385  | 76.62469   | 60.255753  |
| DD110  | 0.9667428  | 43.450493  | 293.90637  | 198.51518  | 220.3076   | 2.2349842  | 19.204292  | 65.00659   | 40.783504  |
| DD22   | 5.510238   | 45.736286  | 164.75868  | 138.61557  | 355.55902  | 1.688514   | 28.364143  | 63.799236  | 32.16725   |
| DD109  | 13.953897  | 28.352657  | 196.8578   | 97.69246   | 346.97745  | 2.3653185  | 18.909946  | 60.93545   | 35.268612  |
| DD65   | 2.7650812  | 47.57259   | 166.92108  | 82.794464  | 678.689    | 0.8435082  | 58.38202   | 31.784197  | 39.90938   |
| DD66   | 1.3587776  | 40.352184  | 160.01614  | 46.72781   | 520.53906  | 1.1335217  | 18.179655  | 53.427967  | 36.647095  |
| DD67   | 0.9892273  | 43.25772   | 183.6763   | 237.84955  | 304.1387   | 1.4922953  | 33.307484  | 80.05861   | 66.984535  |
| DD69   | 4.4313335  | 49.889935  | 141.77167  | 68.5427    | 512.4091   | 6.3226013  | 20.787025  | 19.681702  | 59.995304  |
| DD68   | 1.1228073  | 71.7784    | 136.0728   | 58.665455  | 596.89453  | 15.850867  | 18.620071  | 45.014988  | 65.20007   |
| DD25   | 3.7993484  | 69.62936   | 137.93663  | 50.161842  | 615.04254  | 12.542212  | 36.258003  | 67.04204   | 50.652237  |
| DD28   | 0.861995   | 53.572456  | 151.03133  | 65.181595  | 540.97     | 9.436638   | 16.208176  | 49.843353  | 52.84937   |
| DD29   | 8.626707   | 63.84612   | 123.93359  | 40.378086  | 571.9961   | 3.3063943  | 27.586035  | 56.360615  | 59.19048   |
| DD27   | 2.1952643  | 50.957024  | 35.403343  | 48.736023  | 615.5633   | 2.2387717  | 22.38973   | 22.0596    | 43.363766  |
| DD30   | 0.7529922  | 55.92239   | 228.40051  | 51.42905   | 647.45447  | 1.4527631  | 26.164911  | 63.951916  | 39.66839   |

## Cont'd Supplementary Table 2

| Animal | 1380981_at | 1380948_at | 1380799_at | 1380782_at | 1380651_at | 1380557_at | 1380432_at | 1380399_at | 1380165_at |
|--------|------------|------------|------------|------------|------------|------------|------------|------------|------------|
| DD81   | 14.989585  | 850.28345  | 7.2293563  | 12.698303  | 19.13321   | 44.9382    | 19.768757  | 27.69682   | 82.83916   |
| DD84   | 22.047804  | 860.4645   | 27.87723   | 13.158892  | 38.05099   | 44.500126  | 29.947031  | 27.816439  | 111.10307  |
| DD85   | 29.22867   | 797.50854  | 21.786573  | 14.297215  | 37.1875    | 33.95352   | 22.805231  | 20.024525  | 62.352383  |
| DD86   | 10.761701  | 629.3851   | 19.411526  | 17.134716  | 34.375202  | 65.67997   | 22.72401   | 17.287018  | 70.78405   |
| DD83   | 15.266749  | 714.77185  | 24.20673   | 4.169506   | 31.05227   | 41.447544  | 28.553007  | 12.873482  | 70.102936  |
| DD41   | 138.02586  | 699.76306  | 21.094776  | 17.694206  | 11.077129  | 41.727016  | 28.116962  | 22.368921  | 65.46887   |
| DD42   | 115.40983  | 639.4264   | 31.363312  | 24.321823  | 8.635295   | 28.623594  | 17.85762   | 10.836712  | 50.638687  |
| DD43   | 209.68378  | 490.8873   | 31.224554  | 30.453314  | 28.746435  | 28.927784  | 31.713762  | 27.395264  | 47.476772  |
| DD44   | 60.367756  | 321.50296  | 28.49082   | 16.286766  | 28.759829  | 30.816929  | 25.039993  | 21.786194  | 59.988102  |
| DD87   | 144.54427  | 576.1616   | 12.13191   | 25.296986  | 2.4071417  | 34.332558  | 37.979717  | 32.299038  | 59.372887  |
| DD2    | 69.872696  | 367.13824  | 30.937113  | 31.670732  | 16.213545  | 38.410885  | 42.147816  | 64.501945  | 62.71262   |
| DD3    | 203.94298  | 417.04733  | 13.6312    | 33.46984   | 7.354963   | 44.559372  | 34.745872  | 31.017584  | 37.467884  |
| DD89   | 273.05328  | 286.73975  | 23.973257  | 53.39606   | 22.244968  | 54.72019   | 35.53075   | 13.439446  | 50.903034  |
| DD90   | 233.67708  | 397.4088   | 19.441137  | 48.005516  | 5.498158   | 66.3442    | 27.404112  | 35.769753  | 36.785263  |
| DD4    | 206.34576  | 384.2317   | 15.907218  | 36.364502  | 33.28661   | 38.779305  | 22.936756  | 26.055431  | 40.368496  |
| DD47   | 136.60403  | 322.18182  | 5.976358   | 25.324045  | 27.739439  | 47.397514  | 21.261015  | 5.1576095  | 44.430996  |
| DD48   | 212.09015  | 294.13034  | 53.181763  | 25.650915  | 21.355328  | 41.080917  | 32.00414   | 31.591938  | 27.447416  |
| DD49   | 178.5972   | 506.8336   | 14.051587  | 29.997658  | 0.7577009  | 23.967924  | 39.82821   | 41.312557  | 53.865616  |
| DD50   | 166.95529  | 320.37198  | 21.15041   | 21.381174  | 16.392643  | 34.061596  | 31.060352  | 10.66926   | 41.615894  |
| DD46   | 231.6167   | 405.94113  | 8.691537   | 41.02818   | 9.855517   | 49.40014   | 40.688828  | 44.57667   | 38.138596  |
| DD6    | 165.1959   | 504.52002  | 21.331936  | 24.027903  | 1.8686324  | 47.618378  | 23.434717  | 24.947792  | 42.940956  |
| DD7    | 185.52103  | 471.64413  | 9.196731   | 48.06679   | 12.026315  | 33.732887  | 19.133694  | 26.302265  | 42.385567  |
| DD8    | 141.26009  | 574.5805   | 16.130457  | 31.9524    | 10.442418  | 46.16498   | 20.4132    | 29.032883  | 41.232605  |
| DD5    | 244.94302  | 358.58252  | 23.1847    | 25.512362  | 28.122995  | 32.92693   | 30.072819  | 20.59302   | 28.241367  |
| DD9    | 77.268135  | 482.26318  | 10.060236  | 28.503866  | 1.8204923  | 58.779987  | 29.248804  | 45.405426  | 41.869534  |
| DD103  | 231.013    | 157.36209  | 24.436108  | 86.22825   | 12.220512  | 39.401333  | 5.1202464  | 59.20679   | 10.965572  |
| DD101  | 64.2728    | 2626.7283  | 22.75809   | 59.66034   | 52.053158  | 26.00229   | 12.081147  | 50.71097   | 7.0923758  |
| DD102  | 155.4186   | 1397.7023  | 21.446583  | 86.75901   | 18.51492   | 47.12032   | 15.425035  | 60.301495  | 11.636965  |
| DD105  | 111.67902  | 122.09569  | 27.398014  | 85.23329   | 36.571907  | 29.813261  | 8.474451   | 74.431526  | 40.94963   |
| DD106  | 69.756714  | 2729.1755  | 2.8406048  | 68.98693   | 24.196709  | 33.95177   | 9.642506   | 85.33659   | 5.0128107  |
| DD62   | 42.983624  | 1493.2404  | 6.235926   | 58.97243   | 151.86526  | 5.948123   | 17.803574  | 45.22649   | 1.9385583  |
| DD64   | 41.867832  | 134.43991  | 8.510321   | 55.09507   | 99.953636  | 29.696512  | 12.810167  | 45.074734  | 41.333523  |
| DD107  | 132.31084  | 110.64257  | 21.067514  | 45.177357  | 52.33346   | 1.7200516  | 18.115345  | 49.56595   | 4.872159   |
| DD108  | 134.33275  | 2054.6946  | 2.9939675  | 77.46      | 25.248568  | 16.235098  | 23.743643  | 38.459072  | 6.569503   |
| DD63   | 35.542725  | 2765.4534  | 18.186073  | 95.49461   | 46.00168   | 30.699207  | 12.089346  | 49.795635  | 23.211882  |
| DD23   | 117.37651  | 1190.5388  | 10.411789  | 49.2693    | 78.94739   | 24.190699  | 11.669456  | 49.668182  | 26.592522  |
| DD24   | 77.72867   | 1132.1296  | 11.954263  | 78.493515  | 92.13364   | 5.4435043  | 20.157763  | 31.909029  | 30.573477  |
| DD110  | 31.995077  | 1225.7805  | 19.061987  | 46.170013  | 74.994026  | 5.7611446  | 15.267606  | 30.055958  | 1.3283082  |
| DD22   | 23.912537  | 2703.0654  | 15.077301  | 82.62304   | 40.28655   | 17.441782  | 11.86884   | 33.697716  | 16.116138  |
| DD109  | 35.469448  | 113.81701  | 15.339977  | 64.41574   | 38.750496  | 6.5287666  | 16.937368  | 37.75163   | 21.98732   |
| DD65   | 129.54169  | 214.07556  | 0.6873205  | 66.201454  | 52.09547   | 35.310143  | 1.6832637  | 81.9488    | 7.4531465  |
| DD66   | 59.08141   | 1013.5339  | 1.2480401  | 85.41482   | 50.638474  | 47.573917  | 15.533052  | 70.03711   | 4.5702477  |
| DD67   | 44.349533  | 2066.194   | 20.469511  | 36.910885  | 49.517544  | 18.561377  | 16.169764  | 47.869537  | 50.819363  |
| DD69   | 77.737015  | 73.99983   | 1.3187633  | 79.92815   | 190.91434  | 18.904005  | 14.46816   | 51.54267   | 22.734463  |
| DD68   | 65.99681   | 1515.8265  | 6.664621   | 59.97069   | 86.74579   | 20.180307  | 16.792366  | 41.700462  | 17.314014  |
| DD25   | 42.963882  | 1597.2996  | 2.0809958  | 71.39046   | 10.047026  | 18.317009  | 13.707195  | 50.068157  | 33.806667  |
| DD28   | 33.50954   | 130.75064  | 17.648832  | 51.916027  | 136.9944   | 13.379835  | 12.094996  | 19.030024  | 8.921392   |
| DD29   | 60.451267  | 1352.763   | 0.9036216  | 84.67106   | 160.04346  | 21.961184  | 9.756557   | 44.1891    | 15.022849  |
| DD27   | 125.6708   | 1358.705   | 2.3986917  | 60.3112    | 1.6545802  | 14.474995  | 20.784576  | 55.584915  | 31.964624  |
| DD30   | 100.12954  | 1962.7142  | 3.4119365  | 87.66949   | 54.772892  | 30.282734  | 14.583281  | 33.360016  | 6.876347   |

## Cont'd Supplementary Table 2

| Animal | 1380094_a_ | 1379965_at | 1379929_at | 1379859_at | 1379818_at | 1379747_at | 1379744_at | 1379735_at | 1379615_at |
|--------|------------|------------|------------|------------|------------|------------|------------|------------|------------|
| DD81   | 239.16692  | 53.51751   | 69.31085   | 142.21265  | 78.05424   | 2.23356    | 2.100653   | 3.5191002  | 15.230938  |
| DD84   | 172.5453   | 43.264633  | 62.955276  | 133.5456   | 94.41543   | 9.102011   | 1.5690572  | 0.3635114  | 31.113693  |
| DD85   | 223.12202  | 38.27425   | 54.1131    | 143.15244  | 82.82361   | 5.8875213  | 8.109858   | 2.1836102  | 22.664234  |
| DD86   | 190.28188  | 59.77739   | 59.348633  | 136.44562  | 95.443085  | 8.500949   | 8.070962   | 2.9155064  | 16.197811  |
| DD83   | 197.41388  | 40.329086  | 53.894108  | 124.68935  | 86.959785  | 1.7579423  | 3.3566554  | 6.3349633  | 14.499331  |
| DD41   | 217.16557  | 62.62609   | 72.625565  | 139.3395   | 83.8929    | 4.1060376  | 16.76481   | 1.3611336  | 20.573996  |
| DD42   | 209.31653  | 40.27871   | 80.60171   | 101.32365  | 67.69588   | 0.6557782  | 13.379447  | 1.1844664  | 18.71392   |
| DD43   | 158.3414   | 61.220604  | 28.587595  | 86.439026  | 106.58776  | 2.0698671  | 13.470935  | 11.419094  | 25.982178  |
| DD44   | 131.5671   | 47.520218  | 58.198475  | 91.64041   | 97.1534    | 8.81048    | 10.075101  | 2.7973082  | 20.570564  |
| DD87   | 230.77855  | 75.78575   | 66.23549   | 112.36071  | 85.79021   | 8.489047   | 11.624183  | 9.264753   | 26.910397  |
| DD2    | 230.74991  | 39.012493  | 90.13617   | 66.63001   | 113.09827  | 2.2426143  | 14.595352  | 6.592295   | 27.67867   |
| DD3    | 203.82835  | 37.208725  | 102.64386  | 75.399254  | 155.64496  | 0.2627712  | 11.016521  | 12.796633  | 25.808743  |
| DD89   | 200.66344  | 45.722687  | 69.96325   | 86.94734   | 131.02676  | 9.273419   | 14.510099  | 3.9430375  | 34.55529   |
| DD90   | 230.48047  | 54.73825   | 81.53209   | 98.46646   | 122.38931  | 2.2040355  | 15.418071  | 1.4078557  | 26.186443  |
| DD4    | 207.08968  | 32.521183  | 47.72004   | 117.32789  | 133.32333  | 4.8313103  | 30.47435   | 8.462092   | 12.615846  |
| DD47   | 223.38272  | 28.742674  | 49.89165   | 70.804146  | 112.61846  | 2.8645775  | 9.24472    | 13.680719  | 14.276353  |
| DD48   | 94.780655  | 59.65727   | 40.737587  | 91.75416   | 141.10507  | 5.933954   | 23.854084  | 9.981235   | 29.725725  |
| DD49   | 254.32285  | 34.760643  | 62.187386  | 113.24018  | 164.14296  | 6.705738   | 29.166813  | 7.2912073  | 13.465309  |
| DD50   | 247.65428  | 16.779295  | 69.58393   | 102.2242   | 170.26086  | 0.2895125  | 21.129644  | 8.497069   | 18.703854  |
| DD46   | 240.20795  | 50.064003  | 84.184395  | 109.87742  | 151.78749  | 4.928453   | 18.364244  | 0.5697092  | 20.13322   |
| DD6    | 317.64047  | 34.4284    | 56.603546  | 115.75136  | 149.74815  | 0.3130288  | 32.249874  | 11.186633  | 33.144753  |
| DD7    | 304.6994   | 28.480553  | 47.58688   | 106.3092   | 168.80342  | 2.3673902  | 84.69185   | 3.5315146  | 11.503432  |
| DD8    | 248.78902  | 42.916912  | 85.29984   | 83.63888   | 138.724    | 6.508341   | 16.637068  | 8.260623   | 23.436054  |
| DD5    | 114.32614  | 57.99835   | 39.158283  | 110.2669   | 161.31242  | 3.289782   | 41.192043  | 10.441738  | 9.867427   |
| DD9    | 231.91096  | 42.935047  | 71.18217   | 87.11862   | 133.88092  | 2.6711874  | 47.783997  | 0.4475761  | 16.531313  |
| DD103  | 19.620375  | 32.882145  | 53.194477  | 23.063683  | 22.959003  | 112.33843  | 7.6400723  | 71.44028   | 107.382    |
| DD101  | 26.131454  | 47.591652  | 42.533375  | 13.378202  | 20.504093  | 72.97412   | 15.069393  | 32.461323  | 33.91553   |
| DD102  | 20.075655  | 31.952045  | 79.435005  | 122.02173  | 28.984152  | 103.8893   | 14.850721  | 61.27747   | 128.59628  |
| DD105  | 13.557543  | 20.126389  | 76.49717   | 109.8642   | 14.15839   | 196.277    | 11.97715   | 38.581432  | 76.7941    |
| DD106  | 21.011726  | 32.933327  | 117.9079   | 6.2479277  | 14.008616  | 89.67749   | 13.83903   | 64.168396  | 36.341923  |
| DD62   | 8.705485   | 39.97841   | 19.01292   | 71.63668   | 16.393122  | 21.348124  | 10.401807  | 44.636528  | 47.900574  |
| DD64   | 22.848064  | 47.71083   | 51.267654  | 70.172905  | 21.312525  | 28.751616  | 9.953075   | 43.65963   | 25.590189  |
| DD107  | 20.50838   | 43.6677    | 3.2196758  | 79.72091   | 24.505781  | 30.045948  | 15.013132  | 47.04362   | 66.77458   |
| DD108  | 26.445332  | 32.12377   | 58.516487  | 1.971579   | 14.842741  | 11.813636  | 15.582029  | 46.124977  | 73.362015  |
| DD63   | 12.726597  | 28.546934  | 1.1132365  | 2.4627714  | 21.376272  | 21.567041  | 17.304663  | 51.45463   | 48.177925  |
| DD23   | 15.163792  | 3.6596258  | 48.712032  | 76.95946   | 26.22234   | 7.9218903  | 24.79897   | 28.425867  | 13.559532  |
| DD24   | 24.467499  | 17.954058  | 12.709388  | 82.41942   | 39.200764  | 11.540819  | 29.746489  | 37.09626   | 48.74231   |
| DD110  | 15.711448  | 3.0240304  | 28.42143   | 58.90682   | 28.540783  | 7.415665   | 21.209972  | 49.586147  | 50.020798  |
| DD22   | 24.131704  | 34.584152  | 49.35401   | 13.610624  | 42.82185   | 11.621542  | 66.58939   | 31.165262  | 23.239899  |
| DD109  | 22.115019  | 39.221317  | 11.798647  | 62.254147  | 30.351269  | 2.3911152  | 56.43008   | 23.603863  | 37.562805  |
| DD65   | 48.61857   | 16.935324  | 22.075563  | 71.24578   | 24.303486  | 10.583996  | 26.501965  | 46.45817   | 31.777107  |
| DD66   | 12.424518  | 4.216431   | 25.587238  | 59.96586   | 22.266724  | 8.602815   | 84.15679   | 22.447653  | 20.70579   |
| DD67   | 41.276436  | 9.51587    | 1.9854857  | 126.47574  | 26.178885  | 0.3470399  | 62.898888  | 44.50064   | 59.6461    |
| DD69   | 28.334204  | 21.60259   | 51.635975  | 65.32968   | 24.927063  | 5.6059885  | 33.69114   | 26.707346  | 43.201584  |
| DD68   | 15.392496  | 21.903439  | 46.719513  | 112.25286  | 25.647268  | 6.402053   | 90.59949   | 23.459707  | 47.74877   |
| DD25   | 32.46545   | 2.495782   | 30.947     | 12.817316  | 47.882908  | 4.0238132  | 22.850855  | 30.157955  | 86.10335   |
| DD28   | 11.127222  | 31.699686  | 48.55131   | 56.351097  | 16.034096  | 15.371664  | 30.133495  | 3.2730906  | 42.09945   |
| DD29   | 10.330449  | 24.619259  | 37.837727  | 7.6010056  | 31.167257  | 4.8971143  | 35.994232  | 16.312693  | 45.517048  |
| DD27   | 28.738022  | 3.6670556  | 42.506313  | 103.45799  | 29.441895  | 2.3860245  | 42.86343   | 16.851967  | 50.526474  |
| DD30   | 37.710743  | 16.271381  | 62.085846  | 103.06518  | 37.293083  | 7.453639   | 19.507183  | 13.41955   | 63.91832   |

## Cont'd Supplementary Table 2

| Animal | 1379433_at | 1379411_at | 1379398_at | 1379390_at | 1379346_at | 1379306_at | 1379249_at | 1379107_at | 1379034_at |
|--------|------------|------------|------------|------------|------------|------------|------------|------------|------------|
| DD81   | 226.50133  | 85.197365  | 54.858967  | 29.046432  | 1151.0406  | 43.33828   | 90.159805  | 8.685578   | 80.43319   |
| DD84   | 359.54114  | 46.47592   | 24.042799  | 26.869295  | 1189.8784  | 24.8185    | 53.38012   | 4.064458   | 84.347244  |
| DD85   | 284.5104   | 59.184635  | 49.1618    | 40.571114  | 1129.5612  | 27.952805  | 87.11683   | 10.973142  | 102.3132   |
| DD86   | 258.68008  | 48.36126   | 36.324722  | 37.826923  | 1129.0039  | 31.810461  | 46.711018  | 7.9980097  | 86.88874   |
| DD83   | 339.2192   | 88.93983   | 33.63402   | 25.525795  | 1109.6948  | 37.02922   | 70.484825  | 5.9648314  | 76.735725  |
| DD41   | 187.91743  | 168.5524   | 181.09132  | 32.43093   | 1066.3187  | 33.25661   | 100.75955  | 27.061184  | 75.80286   |
| DD42   | 252.03613  | 157.40485  | 133.27087  | 20.687561  | 1040.179   | 16.5236    | 95.9579    | 26.408564  | 83.95562   |
| DD43   | 251.89186  | 213.68414  | 175.13828  | 19.343142  | 569.54443  | 30.393383  | 129.27751  | 26.827217  | 66.30481   |
| DD44   | 233.64066  | 176.14919  | 138.28008  | 6.8755026  | 946.1649   | 20.9941    | 89.524414  | 20.734053  | 75.63388   |
| DD87   | 252.59428  | 271.66205  | 148.62122  | 33.949158  | 1146.4531  | 37.83577   | 93.332634  | 29.523132  | 85.92063   |
| DD2    | 278.33377  | 598.5589   | 158.09535  | 24.594316  | 1065.0598  | 39.85341   | 101.26813  | 33.791298  | 29.539223  |
| DD3    | 328.4028   | 465.70386  | 286.54575  | 13.755471  | 1008.4019  | 20.790247  | 116.30573  | 25.827774  | 50.988876  |
| DD89   | 250.17969  | 452.04218  | 437.71085  | 5.202229   | 1016.983   | 28.800568  | 152.1019   | 47.4246    | 73.52084   |
| DD90   | 288.92142  | 480.77917  | 349.91217  | 8.897681   | 1094.3185  | 41.143364  | 140.9935   | 52.007896  | 80.03927   |
| DD4    | 318.95166  | 492.3211   | 335.18085  | 14.891195  | 1020.7567  | 35.81463   | 97.49359   | 51.028408  | 41.919712  |
| DD47   | 255.1041   | 755.1317   | 142.5437   | 25.771338  | 1243.3317  | 32.304417  | 78.59737   | 55.195145  | 67.33689   |
| DD48   | 179.72028  | 749.6204   | 151.50027  | 26.796602  | 500.83588  | 25.031046  | 105.39571  | 17.45296   | 62.274887  |
| DD49   | 340.55154  | 711.9491   | 277.22626  | 20.323187  | 1275.345   | 21.167284  | 114.94577  | 45.157116  | 59.52528   |
| DD50   | 300.30093  | 771.1958   | 275.96176  | 24.467388  | 798.5351   | 26.765532  | 88.64117   | 44.495644  | 65.97609   |
| DD46   | 335.49225  | 645.62756  | 328.72354  | 11.184453  | 1029.1968  | 49.92418   | 118.30285  | 48.758038  | 41.659515  |
| DD6    | 324.68497  | 804.7424   | 306.9373   | 9.560606   | 1060.5911  | 35.262367  | 119.99874  | 42.483574  | 59.39095   |
| DD7    | 268.6145   | 904.85156  | 340.87988  | 15.358709  | 1249.1525  | 13.360056  | 137.76736  | 39.97134   | 54.052567  |
| DD8    | 275.37555  | 628.05664  | 280.40704  | 28.563128  | 1334.9976  | 20.779926  | 161.82655  | 25.259537  | 48.7711    |
| DD5    | 191.76859  | 944.79407  | 167.86063  | 6.3311796  | 654.31177  | 34.522266  | 106.35453  | 18.439539  | 87.82544   |
| DD9    | 254.49474  | 656.3388   | 185.7348   | 4.417258   | 1198.5864  | 30.3724    | 123.86972  | 36.634705  | 62.47323   |
| DD103  | 193.04024  | 45.46547   | 533.54816  | 51.32037   | 392.41058  | 92.43288   | 801.7213   | 17.18841   | 46.908394  |
| DD101  | 171.23764  | 33.821823  | 177.1109   | 28.08092   | 348.21347  | 85.54686   | 548.4002   | 18.767902  | 35.578682  |
| DD102  | 188.04646  | 52.231594  | 531.9344   | 41.445732  | 337.4329   | 122.03053  | 673.6334   | 7.752268   | 40.2356    |
| DD105  | 178.19969  | 47.716187  | 343.33243  | 8.586792   | 364.39603  | 121.17144  | 530.4267   | 18.371954  | 50.668564  |
| DD106  | 179.01213  | 10.316475  | 357.4007   | 30.398178  | 671.7693   | 119.49208  | 640.0762   | 11.904994  | 34.47378   |
| DD62   | 130.21513  | 19.452543  | 100.61434  | 52.913723  | 373.09204  | 28.8634    | 78.060295  | 26.540829  | 30.586666  |
| DD64   | 146.48685  | 59.7543    | 147.6064   | 71.266304  | 364.9337   | 154.85326  | 440.88644  | 15.180587  | 19.090233  |
| DD107  | 110.35095  | 107.56698  | 489.30307  | 59.683388  | 925.2146   | 120.13112  | 828.34436  | 13.953062  | 20.182123  |
| DD108  | 137.27397  | 107.17417  | 326.82758  | 45.994923  | 264.50577  | 128.13052  | 431.5747   | 11.399706  | 57.28515   |
| DD63   | 119.9837   | 53.909042  | 522.0879   | 61.57388   | 376.27667  | 115.354    | 509.4616   | 4.5466995  | 59.395267  |
| DD23   | 172.79509  | 49.600544  | 689.20593  | 34.5648    | 621.61847  | 103.88361  | 426.45743  | 22.161694  | 24.703817  |
| DD24   | 161.17563  | 80.51407   | 591.6376   | 51.13938   | 568.48987  | 133.61465  | 930.7449   | 37.520172  | 58.848442  |
| DD110  | 93.76881   | 71.302635  | 320.53046  | 48.785713  | 568.54     | 140.68398  | 368.23175  | 17.160664  | 58.417393  |
| DD22   | 114.3057   | 183.8789   | 187.16402  | 59.957035  | 241.81364  | 111.40203  | 416.9099   | 28.804996  | 21.903801  |
| DD109  | 139.43542  | 139.1018   | 430.31003  | 44.734016  | 654.82623  | 106.11991  | 359.31885  | 23.264164  | 47.352367  |
| DD65   | 136.05746  | 70.12556   | 889.49786  | 34.698486  | 655.21326  | 68.16722   | 698.2937   | 24.355118  | 28.348007  |
| DD66   | 120.3353   | 45.864815  | 629.3924   | 48.89202   | 834.11707  | 100.81179  | 917.4621   | 15.902214  | 14.425143  |
| DD67   | 99.574745  | 87.56525   | 683.0388   | 54.96492   | 987.6381   | 127.65649  | 530.998    | 15.794791  | 50.073784  |
| DD69   | 118.76325  | 95.12982   | 333.80957  | 38.896564  | 362.07104  | 94.30077   | 127.92812  | 32.148827  | 18.933575  |
| DD68   | 190.76865  | 18.472912  | 1021.4968  | 27.611023  | 1098.9486  | 122.43147  | 615.0274   | 23.361332  | 33.131824  |
| DD25   | 277.05908  | 65.15175   | 535.63666  | 51.7935    | 280.3107   | 141.73195  | 1206.0023  | 14.456678  | 23.230194  |
| DD28   | 114.37605  | 59.641148  | 462.66113  | 38.399967  | 716.87054  | 129.7743   | 903.37384  | 22.262053  | 24.089003  |
| DD29   | 136.08     | 69.58906   | 267.48557  | 33.69654   | 278.5215   | 115.94823  | 936.9826   | 35.535385  | 44.58201   |
| DD27   | 138.34448  | 92.77375   | 1021.908   | 45.473988  | 565.7202   | 122.90285  | 110.04121  | 14.778234  | 12.916849  |
| DD30   | 160.71843  | 70.73526   | 812.2696   | 32.822258  | 585.1164   | 112.33652  | 1043.6536  | 39.044575  | 43.1855    |

## Cont'd Supplementary Table 2

| Animal | 1378942_at | 1378871_at | 1378866_at | 1378492_at | 1378458_at | 1378419_at | 1378168_at | 1378163_at | 1377950_at |
|--------|------------|------------|------------|------------|------------|------------|------------|------------|------------|
| DD81   | 38.420425  | 254.50446  | 51.112385  | 8.074526   | 12.021151  | 45.08519   | 141.87346  | 147.6789   | 100.22655  |
| DD84   | 59.238003  | 226.92708  | 45.27038   | 13.39885   | 25.354177  | 39.956673  | 140.76166  | 203.388    | 79.56224   |
| DD85   | 44.111145  | 228.73578  | 40.65822   | 4.9910674  | 4.756868   | 28.382582  | 117.1024   | 158.88142  | 117.13911  |
| DD86   | 45.81015   | 265.40918  | 67.08451   | 5.3412733  | 2.014681   | 34.95356   | 150.27885  | 152.9655   | 106.94489  |
| DD83   | 36.834816  | 234.49425  | 43.330635  | 13.060988  | 14.035625  | 41.41      | 120.04731  | 134.10504  | 90.632645  |
| DD41   | 55.95179   | 225.22807  | 199.96733  | 27.696627  | 15.028223  | 38.72409   | 121.41304  | 124.70754  | 99.59323   |
| DD42   | 73.49446   | 238.63907  | 132.82137  | 27.264593  | 27.570005  | 56.09611   | 108.29198  | 114.05387  | 75.920074  |
| DD43   | 38.449146  | 260.48538  | 93.58085   | 44.466972  | 29.29734   | 61.695137  | 101.98482  | 125.33405  | 81.46677   |
| DD44   | 50.389038  | 240.20918  | 214.34972  | 19.41942   | 7.192797   | 58.094353  | 105.28983  | 159.81259  | 106.10735  |
| DD87   | 57.77885   | 216.72324  | 143.25029  | 16.017097  | 23.308657  | 50.027573  | 102.3966   | 163.64612  | 84.21308   |
| DD2    | 56.250336  | 398.4511   | 128.76697  | 54.08481   | 22.446165  | 41.40228   | 30.832857  | 113.03492  | 70.90941   |
| DD3    | 43.24534   | 265.0927   | 106.15968  | 48.819065  | 15.8034    | 67.554665  | 47.55189   | 116.29086  | 59.156242  |
| DD89   | 39.821537  | 296.57098  | 230.19917  | 57.021355  | 26.381594  | 62.311264  | 59.84488   | 126.10035  | 69.281105  |
| DD90   | 30.863712  | 297.28177  | 308.2757   | 65.76567   | 26.998886  | 52.364124  | 43.790775  | 142.6079   | 86.21108   |
| DD4    | 38.081882  | 280.84882  | 296.92426  | 46.55458   | 31.00898   | 65.66161   | 71.00793   | 124.96393  | 86.36549   |
| DD47   | 37.45344   | 417.2719   | 296.14557  | 54.71029   | 12.046589  | 50.37243   | 33.59912   | 105.48386  | 61.52478   |
| DD48   | 26.311306  | 289.17203  | 103.54255  | 40.54542   | 19.388172  | 69.548065  | 22.871721  | 147.72868  | 57.57982   |
| DD49   | 33.69148   | 306.79208  | 205.54236  | 81.84997   | 16.236677  | 65.517166  | 72.49143   | 145.93271  | 81.265526  |
| DD50   | 35.608284  | 336.85617  | 168.77968  | 68.252396  | 34.293133  | 59.84084   | 48.70666   | 125.01973  | 67.85665   |
| DD46   | 23.912731  | 373.48178  | 208.99365  | 50.895958  | 30.12517   | 57.516945  | 37.25435   | 126.29688  | 77.20118   |
| DD6    | 41.77257   | 253.18134  | 103.96574  | 63.621796  | 27.385239  | 68.39176   | 68.722336  | 171.88536  | 86.78626   |
| DD7    | 49.52566   | 318.3392   | 404.60657  | 76.15819   | 16.667078  | 29.332937  | 65.32012   | 171.0509   | 76.83942   |
| DD8    | 30.914495  | 325.00818  | 103.21688  | 73.3782    | 18.15471   | 56.96298   | 19.723919  | 129.59256  | 50.889404  |
| DD5    | 14.067876  | 181.3088   | 45.743336  | 52.43152   | 8.679462   | 70.677475  | 42.859562  | 112.82021  | 85.610825  |
| DD9    | 47.325512  | 303.25815  | 101.76657  | 81.380356  | 10.606816  | 48.20954   | 10.047605  | 154.21176  | 96.47212   |
| DD103  | 35.487995  | 78.17467   | 50.732285  | 60.224907  | 79.92265   | 4.536247   | 292.79407  | 175.41742  | 0.3008147  |
| DD101  | 32.687893  | 71.838776  | 26.37435   | 21.133387  | 61.305367  | 5.9018455  | 292.1168   | 156.66678  | 26.499527  |
| DD102  | 27.30108   | 17.456715  | 98.35362   | 34.300667  | 107.91756  | 1.1167212  | 231.44029  | 131.86789  | 3.1738942  |
| DD105  | 18.96844   | 88.111115  | 155.4953   | 20.86529   | 83.94037   | 5.753557   | 259.06824  | 118.59827  | 8.028551   |
| DD106  | 52.162045  | 17.363012  | 130.95624  | 21.80441   | 88.633644  | 8.962901   | 303.50027  | 142.00098  | 40.961525  |
| DD62   | 32.322716  | 103.29287  | 132.14272  | 93.48498   | 2.7346618  | 1.7020077  | 192.56476  | 68.33624   | 9.419479   |
| DD64   | 21.437593  | 108.2729   | 122.8066   | 73.47814   | 23.153126  | 41.86775   | 105.23705  | 93.02128   | 4.4215345  |
| DD107  | 9.64737    | 128.12503  | 128.38576  | 52.072685  | 32.9828    | 16.312412  | 267.7325   | 113.53661  | 2.1017962  |
| DD108  | 34.24135   | 2.6408641  | 21.530415  | 53.373344  | 32.37935   | 8.849135   | 240.04065  | 43.953938  | 1.9834393  |
| DD63   | 42.206753  | 4.8070116  | 18.667276  | 40.811     | 22.774149  | 17.499216  | 266.90524  | 83.53211   | 11.850509  |
| DD23   | 12.463168  | 1.8474399  | 111.57812  | 155.77127  | 70.73916   | 14.88857   | 131.72113  | 25.57373   | 9.173136   |
| DD24   | 5.854253   | 159.00822  | 189.90149  | 149.70401  | 50.785324  | 9.292996   | 100.83157  | 67.178535  | 10.218561  |
| DD110  | 3.3912544  | 177.07826  | 71.267654  | 82.2306    | 33.053337  | 41.490807  | 126.05006  | 73.539955  | 2.8544736  |
| DD22   | 21.509773  | 125.5985   | 28.113785  | 123.99019  | 41.130722  | 23.90653   | 151.54369  | 79.82174   | 80.24384   |
| DD109  | 4.9794936  | 124.67107  | 44.97765   | 134.04945  | 29.576277  | 12.160654  | 73.11297   | 96.78156   | 63.128838  |
| DD65   | 15.578895  | 1.161376   | 34.937405  | 152.99988  | 44.541107  | 3.1782084  | 172.96854  | 80.1565    | 1.3846518  |
| DD66   | 4.8266206  | 222.88258  | 92.04457   | 150.46391  | 57.197376  | 3.8555489  | 114.16238  | 31.449959  | 14.606847  |
| DD67   | 16.280304  | 160.17586  | 48.67143   | 183.55159  | 31.91731   | 17.236752  | 72.81315   | 79.00568   | 25.637705  |
| DD69   | 2.3716228  | 204.9867   | 61.855003  | 152.86787  | 62.231686  | 11.335503  | 108.25105  | 92.17978   | 2.3593435  |
| DD68   | 8.640667   | 299.4177   | 55.579784  | 159.80148  | 57.76785   | 12.902144  | 175.30606  | 53.264088  | 20.596884  |
| DD25   | 4.9821525  | 20.109924  | 134.07817  | 128.85628  | 44.24463   | 7.7278805  | 103.97176  | 68.398994  | 13.76197   |
| DD28   | 25.370455  | 132.69576  | 1.154706   | 152.39107  | 30.78344   | 13.69344   | 62.753864  | 52.30258   | 0.6314576  |
| DD29   | 0.9574386  | 316.36383  | 89.63353   | 153.98604  | 42.421227  | 15.521347  | 160.93385  | 40.94639   | 48.93225   |
| DD27   | 22.486301  | 201.07947  | 29.495085  | 152.31204  | 30.979654  | 21.583857  | 45.713108  | 43.80293   | 4.2170725  |
| DD30   | 4.065595   | 188.51245  | 24.748417  | 152.61865  | 35.625267  | 8.780083   | 85.04589   | 61.12839   | 43.656975  |

## Cont'd Supplementary Table 2

| Animal | 1377765_at | 1377584_at | 1377334_at | 1377316_at | 1377195_at | 1376875_at | 1376840_at | 1376332_at | 1376311_at |
|--------|------------|------------|------------|------------|------------|------------|------------|------------|------------|
| DD81   | 74.36015   | 8.597136   | 362.19833  | 30.255428  | 9.575831   | 36.77797   | 34.15628   | 27.00899   | 7.267999   |
| DD84   | 62.873596  | 9.258279   | 286.32663  | 6.95423    | 2.6176083  | 20.350878  | 26.980928  | 7.1203046  | 1.075411   |
| DD85   | 65.96898   | 8.669095   | 347.83478  | 33.538807  | 4.484678   | 32.834145  | 28.61574   | 9.252026   | 7.6462164  |
| DD86   | 69.72036   | 8.809048   | 257.12955  | 34.823914  | 9.503743   | 36.039806  | 17.660273  | 19.322819  | 9.001823   |
| DD83   | 55.12291   | 17.88119   | 283.74728  | 33.909904  | 2.5006394  | 32.869568  | 32.207474  | 1.7684875  | 7.864412   |
| DD41   | 91.72201   | 10.09044   | 323.34647  | 25.44817   | 30.757664  | 39.742775  | 41.24223   | 7.973203   | 3.0407298  |
| DD42   | 93.63566   | 7.363286   | 235.44781  | 19.627726  | 37.759613  | 47.58234   | 37.795345  | 9.400624   | 10.676166  |
| DD43   | 156.98306  | 1.3836075  | 320.7518   | 25.259594  | 15.016233  | 48.321426  | 13.601902  | 13.860613  | 6.1255984  |
| DD44   | 209.04474  | 1.6156061  | 344.33255  | 22.398811  | 14.546032  | 40.899967  | 17.552715  | 2.6992888  | 1.3076918  |
| DD87   | 116.10574  | 2.8792531  | 287.63687  | 33.043365  | 30.726217  | 40.337994  | 24.298716  | 14.023564  | 2.2013476  |
| DD2    | 91.23069   | 12.344094  | 181.60254  | 28.53575   | 20.851034  | 45.35402   | 14.767221  | 5.8673615  | 5.903587   |
| DD3    | 55.77513   | 9.391311   | 248.38731  | 10.117456  | 30.6833    | 41.673046  | 8.315031   | 20.899046  | 1.5691909  |
| DD89   | 53.89224   | 9.924993   | 228.57669  | 20.169962  | 45.266342  | 31.47715   | 22.795813  | 11.01495   | 8.143322   |
| DD90   | 71.59268   | 8.654735   | 283.28885  | 21.939127  | 39.00874   | 40.139347  | 10.831009  | 23.804117  | 1.0587224  |
| DD4    | 66.53277   | 2.3262043  | 298.51187  | 36.586494  | 37.536884  | 40.642624  | 22.769068  | 14.505083  | 1.1698803  |
| DD47   | 61.784576  | 12.355695  | 245.30067  | 30.71731   | 22.474806  | 50.71235   | 24.553123  | 3.305567   | 4.716642   |
| DD48   | 169.53076  | 9.214219   | 260.5962   | 29.095034  | 1.7222844  | 27.056042  | 6.2509894  | 22.544386  | 3.940718   |
| DD49   | 36.619934  | 17.749475  | 376.5437   | 29.147644  | 27.007196  | 28.30491   | 19.297224  | 7.125225   | 7.8938723  |
| DD50   | 53.75414   | 7.5030503  | 209.18968  | 35.57852   | 19.558779  | 47.561886  | 5.625853   | 20.484688  | 2.6986215  |
| DD46   | 57.393814  | 15.70447   | 238.3343   | 24.53134   | 23.79072   | 30.811432  | 28.885954  | 23.32027   | 6.0081577  |
| DD6    | 44.10073   | 11.591466  | 261.49576  | 32.91108   | 18.08093   | 37.846653  | 26.031015  | 18.417973  | 2.7072191  |
| DD7    | 25.029057  | 11.228602  | 252.99045  | 38.27051   | 37.231796  | 52.830067  | 18.563929  | 12.629993  | 2.1367502  |
| DD8    | 15.552562  | 7.7624702  | 239.50186  | 27.181616  | 27.71136   | 32.307323  | 30.330013  | 9.5799     | 1.4393399  |
| DD5    | 154.782    | 11.739633  | 257.74695  | 27.738672  | 4.7699556  | 38.294262  | 18.368256  | 8.112524   | 1.75517    |
| DD9    | 25.853668  | 10.51879   | 204.28609  | 45.175274  | 13.81819   | 52.09891   | 15.549627  | 10.763418  | 17.242487  |
| DD103  | 113.20495  | 10.562324  | 86.07295   | 19.432442  | 78.51087   | 83.624344  | 290.59708  | 35.93931   | 12.479645  |
| DD101  | 223.99875  | 2.506681   | 21.470182  | 25.803223  | 48.012135  | 78.46341   | 125.97588  | 31.821344  | 9.503369   |
| DD102  | 199.05894  | 0.5826901  | 117.65911  | 11.438719  | 49.35632   | 69.01225   | 248.13905  | 30.69017   | 18.57772   |
| DD105  | 213.73534  | 6.33125    | 50.52209   | 29.95487   | 37.976444  | 78.11524   | 183.12123  | 38.92595   | 13.699641  |
| DD106  | 208.12665  | 6.0097113  | 2.6486058  | 21.10214   | 53.904606  | 49.7174    | 212.98877  | 49.687515  | 17.144602  |
| DD62   | 316.61224  | 4.9230094  | 117.54942  | 0.8454874  | 16.75152   | 80.17387   | 84.64912   | 34.1978    | 10.222368  |
| DD64   | 208.4082   | 5.4424047  | 4.959526   | 3.6365056  | 20.351372  | 57.663963  | 67.45585   | 39.136017  | 9.357269   |
| DD107  | 213.33395  | 15.853419  | 120.53146  | 20.149878  | 33.897655  | 57.10584   | 168.96451  | 34.612564  | 11.309841  |
| DD108  | 202.08664  | 11.188242  | 95.38696   | 18.196732  | 20.153135  | 81.57643   | 154.33167  | 30.496704  | 7.9496017  |
| DD63   | 259.4353   | 13.643233  | 125.90937  | 19.583265  | 17.390787  | 80.12671   | 150.62111  | 43.201355  | 13.347601  |
| DD23   | 104.31852  | 8.786995   | 169.0982   | 14.298933  | 34.175816  | 75.50166   | 101.60284  | 21.314621  | 11.653582  |
| DD24   | 71.689     | 1.6657474  | 127.15042  | 20.164001  | 56.98769   | 91.13909   | 66.66598   | 56.80181   | 9.714915   |
| DD110  | 257.8147   | 12.722683  | 142.18753  | 25.140694  | 13.064528  | 125.63339  | 59.709427  | 39.740692  | 7.8480706  |
| DD22   | 214.76994  | 5.486562   | 122.77243  | 25.923233  | 31.336506  | 123.40973  | 87.88319   | 43.2591    | 17.133043  |
| DD109  | 210.95566  | 2.1836183  | 123.69271  | 13.964955  | 16.92682   | 102.31903  | 55.317097  | 34.70449   | 10.340165  |
| DD65   | 58.082176  | 2.540351   | 1.0802802  | 31.597534  | 35.331272  | 67.5062    | 123.88462  | 59.229843  | 9.124664   |
| DD66   | 118.70928  | 11.465561  | 2.59164    | 9.522991   | 33.945827  | 66.59182   | 60.853653  | 61.747635  | 3.393687   |
| DD67   | 103.52573  | 2.020403   | 106.07301  | 8.915229   | 28.896427  | 93.21824   | 88.629875  | 49.279873  | 3.4684684  |
| DD69   | 80.89947   | 10.81393   | 86.41116   | 12.246875  | 28.152628  | 149.46394  | 76.96485   | 44.667774  | 2.7371979  |
| DD68   | 90.48147   | 6.4992075  | 121.67436  | 14.46854   | 47.587265  | 94.30855   | 123.91967  | 54.955627  | 10.320159  |
| DD25   | 110.09827  | 8.443004   | 76.63699   | 40.61933   | 33.87665   | 128.61412  | 169.13995  | 68.18945   | 5.594612   |
| DD28   | 81.0329    | 2.5119689  | 9.718896   | 4.961768   | 48.311745  | 87.68466   | 54.346607  | 39.22929   | 3.3807898  |
| DD29   | 89.77575   | 8.655601   | 109.1154   | 16.011114  | 56.209244  | 129.26268  | 87.318726  | 34.23653   | 3.0730126  |
| DD27   | 99.89016   | 0.5993089  | 9.588562   | 18.147694  | 39.050426  | 131.30397  | 71.95912   | 44.13972   | 16.313839  |
| DD30   | 49.01424   | 11.152409  | 4.8037024  | 12.447726  | 46.649242  | 66.0634    | 73.83908   | 47.034966  | 15.646646  |

## Cont'd Supplementary Table 2

| Animal | 1376129_at | 1375909_at | 1375758_at | 1375664_at | 1375655_at | 1375601_at | 1375422_at | 1375071_at | 1375043_at |
|--------|------------|------------|------------|------------|------------|------------|------------|------------|------------|
| DD81   | 127.18671  | 482.77075  | 52.496437  | 131.6714   | 134.70712  | 5.6245236  | 57.75515   | 18.113054  | 439.95956  |
| DD84   | 129.73666  | 426.43192  | 60.0949    | 144.30627  | 171.12868  | 5.264752   | 74.82871   | 39.74754   | 410.72058  |
| DD85   | 96.01085   | 437.66498  | 63.440464  | 123.17085  | 186.2854   | 19.051788  | 104.39027  | 29.865084  | 202.0634   |
| DD86   | 142.55168  | 500.865    | 46.44423   | 134.94446  | 140.38329  | 1.6621864  | 42.066654  | 32.701443  | 150.45908  |
| DD83   | 97.12671   | 470.34122  | 51.10924   | 120.08334  | 144.89537  | 2.2159936  | 54.98933   | 18.83621   | 378.3529   |
| DD41   | 85.09356   | 403.2586   | 34.510193  | 119.14713  | 211.03079  | 29.89403   | 468.49014  | 10.28443   | 728.6003   |
| DD42   | 129.83325  | 446.8349   | 50.45558   | 149.32092  | 210.2892   | 24.972944  | 401.3265   | 3.3681564  | 886.2339   |
| DD43   | 185.47144  | 456.14215  | 51.14348   | 190.81776  | 206.66122  | 114.33247  | 438.0851   | 10.203543  | 460.08466  |
| DD44   | 84.02644   | 438.28284  | 43.272923  | 82.8811    | 207.4419   | 38.923397  | 332.08566  | 21.30392   | 1052.2032  |
| DD87   | 115.31089  | 424.7784   | 29.049807  | 120.93357  | 196.46227  | 23.761726  | 304.57867  | 9.555298   | 1729.8467  |
| DD2    | 87.30323   | 431.4609   | 50.686203  | 116.49146  | 329.23898  | 39.96103   | 194.28679  | 19.114296  | 2608.5862  |
| DD3    | 125.55559  | 376.4321   | 40.483593  | 140.53925  | 437.6524   | 79.88533   | 228.37592  | 14.453055  | 854.99774  |
| DD89   | 161.48509  | 394.82898  | 37.695618  | 116.1455   | 445.01862  | 118.47279  | 383.99808  | 18.797522  | 1432.8573  |
| DD90   | 121.9911   | 408.96677  | 42.059437  | 133.27591  | 464.77057  | 86.19464   | 403.16544  | 23.393126  | 1157.9392  |
| DD4    | 150.49016  | 389.03726  | 33.93769   | 126.94159  | 449.21643  | 91.99122   | 211.00902  | 21.84848   | 2190.7773  |
| DD47   | 78.96446   | 389.74164  | 38.18218   | 92.014565  | 421.3531   | 1.6400048  | 168.26584  | 31.246513  | 516.335    |
| DD48   | 233.7677   | 454.4826   | 10.712223  | 135.04852  | 194.15079  | 76.923874  | 255.9831   | 2.0153458  | 1428.3853  |
| DD49   | 177.4721   | 336.71637  | 13.2852    | 168.64813  | 448.32986  | 15.287494  | 189.4028   | 30.624563  | 1105.2832  |
| DD50   | 223.17683  | 378.86896  | 51.679073  | 162.37427  | 337.33884  | 94.29016   | 536.2541   | 19.31061   | 2065.762   |
| DD46   | 177.82178  | 370.5365   | 46.997757  | 163.64679  | 407.71982  | 128.60973  | 617.9412   | 17.708197  | 1846.1346  |
| DD6    | 142.53384  | 354.21307  | 21.66187   | 145.34024  | 465.47952  | 33.670856  | 325.95804  | 18.709236  | 398.61823  |
| DD7    | 124.0865   | 344.81805  | 32.718292  | 124.992    | 444.30356  | 32.48811   | 331.94864  | 21.06523   | 1190.2303  |
| DD8    | 128.76353  | 373.86285  | 28.591738  | 142.03401  | 450.93326  | 23.964418  | 323.64362  | 15.874901  | 1248.9744  |
| DD5    | 220.09805  | 408.1179   | 37.636475  | 162.53458  | 268.45438  | 59.19665   | 509.99966  | 7.986596   | 389.83585  |
| DD9    | 112.89108  | 368.21927  | 34.221703  | 136.09346  | 434.98264  | 15.960852  | 245.33589  | 26.640963  | 1519.6119  |
| DD103  | 367.67056  | 151.38615  | 33.89708   | 498.2383   | 118.01469  | 96.792725  | 1756.881   | 45.662647  | 190.98192  |
| DD101  | 228.90382  | 176.36296  | 58.08701   | 530.9045   | 131.13602  | 42.3488    | 824.04114  | 59.657757  | 138.14442  |
| DD102  | 290.42838  | 151.39207  | 34.474915  | 409.04892  | 168.89532  | 86.4073    | 1525.9069  | 68.75769   | 438.6636   |
| DD105  | 268.87354  | 164.63307  | 38.675106  | 650.3588   | 175.43564  | 62.234337  | 1463.9224  | 66.573586  | 149.26321  |
| DD106  | 296.70453  | 171.60208  | 80.83082   | 154.22418  | 220.15088  | 28.867643  | 841.6427   | 72.1095    | 116.07082  |
| DD62   | 367.14127  | 160.98125  | 15.747775  | 97.95096   | 107.29601  | 9.77995    | 495.5818   | 33.356327  | 848.1213   |
| DD64   | 196.8198   | 145.15865  | 24.463177  | 299.01462  | 128.67253  | 12.433826  | 516.3102   | 41.870255  | 1719.8801  |
| DD107  | 432.3148   | 156.16028  | 32.94583   | 289.53693  | 151.48212  | 12.037163  | 450.28845  | 26.704796  | 409.63788  |
| DD108  | 441.18274  | 137.84932  | 34.399338  | 343.51245  | 79.3576    | 3.8031144  | 514.36304  | 44.712963  | 290.7171   |
| DD63   | 334.4755   | 143.97415  | 35.608463  | 566.81287  | 123.92162  | 21.033163  | 757.27563  | 26.252354  | 450.33145  |
| DD23   | 140.08876  | 122.33244  | 2.113699   | 329.7337   | 169.59602  | 39.584457  | 464.2952   | 53.410614  | 467.82422  |
| DD24   | 399.3551   | 111.87091  | 26.680004  | 584.7988   | 294.44632  | 70.178665  | 499.85858  | 54.639896  | 1031.9486  |
| DD110  | 352.51852  | 121.78002  | 36.261192  | 508.25052  | 143.42929  | 16.450819  | 318.54285  | 42.391956  | 737.409    |
| DD22   | 287.5745   | 135.503    | 2.7401223  | 488.95764  | 191.9633   | 4.146652   | 573.3088   | 33.087383  | 916.8939   |
| DD109  | 256.05524  | 170.1738   | 27.876932  | 267.01926  | 100.29311  | 4.1664395  | 1050.8634  | 29.014286  | 811.84863  |
| DD65   | 240.26602  | 131.56204  | 18.918268  | 454.01413  | 265.4047   | 63.46471   | 1000.8742  | 35.983864  | 446.40988  |
| DD66   | 302.90433  | 141.19817  | 29.545595  | 521.79474  | 268.11945  | 74.46902   | 928.39417  | 33.18261   | 577.7276   |
| DD67   | 130.29741  | 146.80154  | 25.615173  | 391.61536  | 100.0939   | 18.795128  | 471.9593   | 47.686165  | 417.5057   |
| DD69   | 273.89716  | 129.80713  | 30.546478  | 334.12878  | 169.70041  | 66.27588   | 1180.8247  | 62.340485  | 392.7515   |
| DD68   | 331.53995  | 127.85832  | 6.5380177  | 360.8096   | 158.29233  | 54.285793  | 456.61838  | 44.184002  | 555.32996  |
| DD25   | 318.14682  | 160.96236  | 2.0405295  | 340.29956  | 120.77049  | 1.9300021  | 330.2739   | 41.76283   | 259.93408  |
| DD28   | 251.14417  | 149.57008  | 3.7419639  | 359.9466   | 100.69485  | 12.806257  | 243.5533   | 31.116255  | 622.0462   |
| DD29   | 125.8206   | 163.01874  | 18.921122  | 630.46686  | 101.54316  | 15.101224  | 287.67285  | 41.373592  | 745.9077   |
| DD27   | 259.60873  | 129.32616  | 24.450317  | 402.78732  | 258.04614  | 2.959653   | 268.51508  | 42.359722  | 578.15985  |
| DD30   | 168.83429  | 127.21435  | 13.394173  | 652.7523   | 118.67985  | 2.393827   | 279.55917  | 51.811962  | 364.97418  |

## Cont'd Supplementary Table 2

| Animal | 1374924_at | 1374698_at | 1374606_at | 1374583_at | 1374558_at | 1374177_at | 1374148_at | 1373889_at | 1373786_at |
|--------|------------|------------|------------|------------|------------|------------|------------|------------|------------|
| DD81   | 41.79125   | 554.4905   | 39.341923  | 38.58932   | 23.381847  | 1227.6896  | 6.348701   | 45.9974    | 408.1386   |
| DD84   | 78.53904   | 426.23773  | 38.647892  | 56.8051    | 19.311577  | 1200.9612  | 1.4459053  | 44.188427  | 523.8363   |
| DD85   | 52.84955   | 525.7337   | 29.718975  | 47.88885   | 17.522022  | 1335.2129  | 2.3461804  | 43.262947  | 480.83264  |
| DD86   | 47.42116   | 513.6041   | 37.770157  | 31.420761  | 17.70905   | 1123.4955  | 14.51361   | 20.922792  | 394.82684  |
| DD83   | 71.093445  | 516.49     | 35.06834   | 42.308746  | 23.816103  | 1215.8744  | 18.25272   | 30.523018  | 395.16693  |
| DD41   | 64.51983   | 474.22638  | 71.84996   | 39.751984  | 29.34962   | 1378.666   | 5.643809   | 32.397175  | 563.9325   |
| DD42   | 63.480362  | 578.50183  | 51.47385   | 34.04772   | 10.262856  | 1220.4095  | 10.984653  | 51.486168  | 662.608    |
| DD43   | 49.564137  | 402.66135  | 57.88414   | 32.543644  | 12.986341  | 1367.386   | 16.07332   | 45.549286  | 417.6567   |
| DD44   | 56.460526  | 488.8077   | 56.977272  | 58.754234  | 15.979607  | 1287.4546  | 28.16992   | 65.76537   | 310.9361   |
| DD87   | 55.73794   | 512.2196   | 52.977955  | 64.54009   | 21.634808  | 1234.8494  | 27.444323  | 44.582264  | 503.716    |
| DD2    | 43.09273   | 463.55014  | 28.799833  | 50.77816   | 10.204603  | 1212.5212  | 37.323944  | 50.01745   | 508.2969   |
| DD3    | 56.905323  | 488.60147  | 43.739346  | 58.09362   | 16.285904  | 1530.403   | 70.99739   | 44.308224  | 511.62415  |
| DD89   | 40.0769    | 413.3965   | 46.923866  | 49.21221   | 6.85536    | 1576.3506  | 48.89682   | 51.10663   | 475.7693   |
| DD90   | 60.7713    | 392.59814  | 43.684406  | 36.767647  | 4.193156   | 1486.0739  | 73.54808   | 43.166946  | 448.09137  |
| DD4    | 60.14112   | 384.95142  | 25.919737  | 43.752182  | 14.536976  | 1428.1228  | 43.426308  | 60.514565  | 448.97272  |
| DD47   | 47.93021   | 488.32516  | 48.451107  | 47.769936  | 16.166147  | 1273.8268  | 57.961334  | 31.422369  | 846.09546  |
| DD48   | 51.83449   | 325.128    | 42.71304   | 40.512398  | 4.6395626  | 1206.8854  | 93.96326   | 73.13571   | 380.71185  |
| DD49   | 35.272022  | 267.29706  | 40.104794  | 43.202965  | 3.6515057  | 1353.5747  | 78.178276  | 65.396904  | 810.64703  |
| DD50   | 44.42135   | 339.14523  | 37.73032   | 56.717094  | 2.5326915  | 985.317    | 68.9779    | 37.894436  | 932.5452   |
| DD46   | 39.657845  | 269.1866   | 15.899978  | 47.517067  | 21.515545  | 1359.205   | 54.024883  | 68.33221   | 610.6471   |
| DD6    | 46.54983   | 425.0623   | 48.72493   | 63.8918    | 6.657408   | 1604.315   | 101.84034  | 44.748867  | 920.6149   |
| DD7    | 38.418644  | 283.04904  | 37.146023  | 36.319736  | 13.222329  | 1478.2375  | 127.07098  | 37.396675  | 558.37366  |
| DD8    | 44.155495  | 340.86124  | 31.571884  | 38.25384   | 15.776517  | 1508.2911  | 105.75005  | 38.54189   | 612.52246  |
| DD5    | 38.050697  | 317.39575  | 50.093693  | 39.473454  | 7.1386905  | 1686.0349  | 94.10763   | 41.388603  | 359.3725   |
| DD9    | 56.766743  | 336.93683  | 53.0275    | 53.043995  | 4.296598   | 1709.858   | 91.73897   | 26.054693  | 790.54974  |
| DD103  | 33.839104  | 408.9155   | 40.698696  | 94.31068   | 36.49967   | 685.6567   | 9.759201   | 67.70446   | 277.03415  |
| DD101  | 33.072433  | 68.09814   | 26.489773  | 155.00764  | 53.338745  | 568.2874   | 4.1866107  | 93.23601   | 156.55206  |
| DD102  | 26.405058  | 180.73802  | 18.18129   | 124.06001  | 32.527615  | 567.1169   | 23.936405  | 59.513447  | 202.10504  |
| DD105  | 18.520496  | 304.02704  | 31.348257  | 39.11215   | 38.195023  | 566.3762   | 6.1256986  | 97.0584    | 161.84889  |
| DD106  | 37.778236  | 124.65776  | 23.304773  | 154.97313  | 47.478645  | 562.485    | 1.9117334  | 61.599785  | 170.46268  |
| DD62   | 29.833439  | 433.75848  | 27.43387   | 151.31552  | 39.49564   | 477.81107  | 1.755485   | 103.65991  | 318.76495  |
| DD64   | 34.28032   | 420.88907  | 11.672039  | 90.888565  | 39.70294   | 559.6305   | 8.551049   | 108.45621  | 186.81934  |
| DD107  | 16.648266  | 152.9748   | 9.232522   | 145.00705  | 64.46646   | 514.8491   | 2.8153713  | 87.064865  | 265.76202  |
| DD108  | 25.372252  | 717.9566   | 44.101906  | 149.3433   | 38.997665  | 503.1038   | 1.8925698  | 141.81076  | 326.8115   |
| DD63   | 25.119436  | 120.50907  | 23.13447   | 98.76156   | 39.60991   | 514.1589   | 19.0489    | 89.13227   | 245.56589  |
| DD23   | 26.158422  | 123.40299  | 16.647198  | 75.1169    | 46.227913  | 589.3712   | 14.694339  | 115.60329  | 199.65883  |
| DD24   | 27.677406  | 60.899395  | 24.91354   | 121.59514  | 51.308144  | 538.5318   | 46.952232  | 129.84314  | 231.58171  |
| DD110  | 23.944294  | 76.2056    | 7.944002   | 114.31024  | 50.751675  | 492.53165  | 38.247437  | 139.86261  | 324.04117  |
| DD22   | 14.809835  | 134.24124  | 37.398373  | 146.22229  | 44.73533   | 527.9145   | 33.083694  | 112.91377  | 182.04286  |
| DD109  | 36.00803   | 116.42836  | 17.292404  | 125.77341  | 23.73668   | 595.5252   | 39.09731   | 141.56306  | 214.30865  |
| DD65   | 29.421959  | 15.117475  | 26.707024  | 96.16736   | 15.182763  | 638.8203   | 12.193028  | 92.383484  | 687.6295   |
| DD66   | 11.814281  | 52.266197  | 30.456972  | 163.78963  | 33.30402   | 589.22095  | 6.6766987  | 92.642876  | 354.7144   |
| DD67   | 17.582731  | 90.28414   | 26.013084  | 95.362564  | 30.93925   | 713.54974  | 60.864845  | 91.18719   | 262.6045   |
| DD69   | 41.633     | 280.1061   | 16.898792  | 82.54624   | 33.3993    | 605.9639   | 17.796837  | 54.18128   | 426.5434   |
| DD68   | 20.21109   | 15.238535  | 27.871117  | 141.24884  | 20.32768   | 661.95435  | 12.521484  | 68.777     | 243.4757   |
| DD25   | 3.6986365  | 118.76396  | 15.580935  | 172.36136  | 64.46716   | 511.71503  | 8.060806   | 96.7117    | 524.87616  |
| DD28   | 6.8714304  | 137.83478  | 16.194473  | 159.01459  | 34.64011   | 556.7842   | 37.047543  | 70.00089   | 345.7467   |
| DD29   | 14.884419  | 78.13872   | 18.498333  | 185.817    | 57.282936  | 561.9018   | 46.014183  | 79.38194   | 365.92078  |
| DD27   | 11.084703  | 68.22448   | 44.997078  | 89.65909   | 26.553223  | 515.9712   | 56.12354   | 91.542786  | 305.28122  |
| DD30   | 27.56019   | 106.09454  | 21.974848  | 107.54112  | 49.35799   | 594.1393   | 37.946575  | 61.682602  | 849.44727  |

## Cont'd Supplementary Table 2

| Animal | 1373759_at | 1373582_at | 1373162_at | 1373152_at | 1372993_at | 1372685_at | 1372628_at | 1372239_at | 1372059_at |
|--------|------------|------------|------------|------------|------------|------------|------------|------------|------------|
| DD81   | 24.315985  | 121.89683  | 618.45215  | 1390.57    | 175.8509   | 114.74481  | 524.83453  | 125.98666  | 710.18054  |
| DD84   | 20.003906  | 80.24039   | 773.98346  | 1504.5731  | 252.5924   | 138.19894  | 546.60345  | 125.62821  | 640.0291   |
| DD85   | 24.602455  | 111.95093  | 652.85284  | 1457.0902  | 168.64238  | 109.91557  | 530.0692   | 160.2312   | 723.25385  |
| DD86   | 17.591505  | 118.18386  | 531.2719   | 1374.2257  | 174.30106  | 146.92184  | 512.85944  | 149.8312   | 632.3033   |
| DD83   | 20.621494  | 66.88757   | 651.958    | 1546.3934  | 164.73264  | 124.29591  | 557.9461   | 152.7539   | 832.76715  |
| DD41   | 43.40863   | 78.41799   | 469.14218  | 1552.2749  | 112.34057  | 46.02435   | 511.11877  | 119.78185  | 1211.3629  |
| DD42   | 63.78507   | 66.79638   | 566.182    | 1449.8928  | 124.80724  | 32.11882   | 489.1597   | 133.99492  | 1160.6107  |
| DD43   | 17.223358  | 61.838432  | 510.65744  | 1652.5938  | 70.71169   | 38.43386   | 397.74637  | 137.41484  | 1142.4619  |
| DD44   | 34.18321   | 67.41766   | 492.63156  | 1701.2626  | 141.9747   | 36.167107  | 446.6276   | 129.6905   | 1113.1039  |
| DD87   | 68.57652   | 72.79598   | 434.22107  | 1669.5955  | 104.93662  | 35.927654  | 456.30127  | 137.46442  | 1191.4784  |
| DD2    | 204.36076  | 43.718758  | 354.7836   | 1611.2344  | 104.56669  | 5.6061234  | 352.5908   | 115.50327  | 977.2324   |
| DD3    | 26.020063  | 38.83025   | 327.0659   | 1636.439   | 120.02629  | 4.905367   | 429.21225  | 114.19623  | 1005.4452  |
| DD89   | 37.526825  | 65.82885   | 375.38596  | 1660.0083  | 99.11071   | 14.897146  | 429.96848  | 144.18987  | 1072.0337  |
| DD90   | 33.117523  | 44.95162   | 335.6816   | 1721.147   | 70.864105  | 4.6405916  | 437.34192  | 133.48254  | 1000.5357  |
| DD4    | 72.62513   | 49.21547   | 380.7881   | 1813.0927  | 107.99894  | 2.3989677  | 389.12753  | 111.45377  | 1007.4782  |
| DD47   | 13.25909   | 53.42467   | 373.80923  | 1848.9382  | 105.47694  | 14.226503  | 444.09073  | 112.54022  | 1120.8313  |
| DD48   | 37.146793  | 29.553759  | 339.53433  | 1887.12    | 101.15901  | 20.07499   | 474.51547  | 122.62903  | 1104.305   |
| DD49   | 33.36937   | 59.74602   | 396.9194   | 1707.2073  | 139.07718  | 2.124065   | 607.8448   | 133.51233  | 1070.9766  |
| DD50   | 131.35695  | 59.709915  | 331.18793  | 1703.1033  | 96.25337   | 9.203175   | 643.8668   | 122.46559  | 1140.1831  |
| DD46   | 68.41767   | 45.115757  | 346.41266  | 1868.0188  | 81.94186   | 5.0734825  | 479.33832  | 133.87767  | 1020.1596  |
| DD6    | 14.106001  | 38.138737  | 359.87698  | 1910.9386  | 64.7922    | 6.7696376  | 442.39127  | 140.43993  | 1102.7799  |
| DD7    | 58.574055  | 31.355728  | 335.9633   | 1952.607   | 57.70929   | 2.3298092  | 481.8001   | 132.57599  | 1110.2883  |
| DD8    | 47.648926  | 40.529247  | 375.77835  | 1974.3633  | 66.82361   | 1.2495537  | 464.9052   | 149.9574   | 1169.5422  |
| DD5    | 10.349148  | 9.890787   | 369.09943  | 2048.0896  | 74.62728   | 8.638989   | 458.40747  | 113.96351  | 1209.3893  |
| DD9    | 57.53211   | 49.4099    | 373.0741   | 1888.5023  | 89.31292   | 0.9394885  | 518.92017  | 141.48102  | 1243.6432  |
| DD103  | 2.4638352  | 38.760807  | 348.19946  | 869.18994  | 348.6117   | 137.68591  | 1190.2197  | 70.617676  | 140.67732  |
| DD101  | 17.527124  | 28.910065  | 357.04355  | 1007.5625  | 304.47113  | 187.80249  | 974.58856  | 61.86321   | 151.87573  |
| DD102  | 8.815128   | 40.413704  | 282.96262  | 753.11523  | 323.98303  | 210.01729  | 1103.9548  | 63.95696   | 106.94415  |
| DD105  | 9.372732   | 37.917095  | 282.94748  | 824.1102   | 332.9796   | 200.65645  | 902.67694  | 71.96734   | 110.50687  |
| DD106  | 10.330812  | 49.766193  | 305.50107  | 779.1956   | 312.29758  | 151.60982  | 997.0257   | 57.07528   | 239.5162   |
| DD62   | 27.666285  | 29.47543   | 210.3228   | 920.17255  | 220.67221  | 61.414536  | 936.7674   | 52.33552   | 344.4242   |
| DD64   | 80.174255  | 15.671442  | 239.22205  | 890.0294   | 244.30388  | 49.4632    | 942.06335  | 75.28217   | 397.95667  |
| DD107  | 39.104214  | 26.24923   | 185.4127   | 775.6521   | 254.8957   | 47.258102  | 1021.3526  | 56.367992  | 306.00467  |
| DD108  | 29.568684  | 40.23969   | 199.76378  | 826.0118   | 241.94002  | 54.478058  | 1058.9312  | 48.411907  | 263.95914  |
| DD63   | 2.652783   | 31.013424  | 195.00119  | 894.5609   | 243.54144  | 52.482967  | 985.8746   | 50.693268  | 442.57935  |
| DD23   | 23.821737  | 19.947699  | 236.20259  | 831.2826   | 207.0551   | 17.52846   | 884.6884   | 50.282665  | 417.3855   |
| DD24   | 42.302547  | 28.572886  | 197.4951   | 979.8615   | 219.54228  | 23.246855  | 898.80133  | 58.765293  | 443.07086  |
| DD110  | 19.42164   | 29.176064  | 224.9341   | 737.178    | 170.98674  | 9.901937   | 915.74927  | 64.407425  | 929.5861   |
| DD22   | 16.410467  | 20.666132  | 168.43439  | 1082.5721  | 146.3245   | 17.44101   | 743.8095   | 68.76816   | 442.8282   |
| DD109  | 15.1154    | 23.707897  | 195.32927  | 731.8959   | 109.9391   | 2.3668373  | 938.2355   | 59.89463   | 881.35364  |
| DD65   | 2.560326   | 8.342086   | 206.51634  | 801.94635  | 216.3259   | 18.7833    | 947.194    | 70.19412   | 1664.9879  |
| DD66   | 25.045555  | 29.562475  | 178.71721  | 848.9983   | 194.2017   | 20.811567  | 945.0673   | 42.764828  | 1060.3536  |
| DD67   | 17.715012  | 2.7710853  | 317.05176  | 954.26404  | 169.3199   | 3.0178688  | 942.1968   | 58.073124  | 939.4436   |
| DD69   | 26.663641  | 16.525745  | 173.6586   | 679.85205  | 233.56285  | 16.413425  | 892.55023  | 38.423126  | 287.06015  |
| DD68   | 25.619259  | 15.54348   | 223.1466   | 908.11383  | 257.44852  | 14.296253  | 963.938    | 37.416534  | 399.9422   |
| DD25   | 3.6188781  | 15.732475  | 143.06604  | 662.6024   | 198.63852  | 4.0815816  | 776.47034  | 69.924095  | 346.57184  |
| DD28   | 22.149048  | 15.998978  | 167.96927  | 794.45325  | 226.76947  | 12.6308    | 1012.126   | 34.434307  | 297.4224   |
| DD29   | 40.12285   | 16.55644   | 181.04842  | 788.70056  | 203.60524  | 13.008134  | 1012.4104  | 42.67695   | 327.55743  |
| DD27   | 4.542533   | 36.27261   | 182.14731  | 658.9361   | 188.1199   | 19.291245  | 1007.1254  | 73.25171   | 266.4555   |
| DD30   | 3.700635   | 21.759241  | 179.14392  | 869.4714   | 193.38751  | 2.1103687  | 930.43744  | 67.8853    | 428.27823  |

## Cont'd Supplementary Table 2

| Animal | 1371960_at | 1371776_at | 1371442_at | 1371245_a | 1371213_at | 1371209_at | 1371137_at | 1371033_at | 1370902_at |
|--------|------------|------------|------------|-----------|------------|------------|------------|------------|------------|
| DD81   | 145.20418  | 630.59357  | 111.86948  | 765.88354 | 73.02922   | 0.6614567  | 72.957985  | 1.8711745  | 3.28337    |
| DD84   | 167.93375  | 599.3872   | 90.21118   | 936.1017  | 62.991222  | 7.9434295  | 72.306335  | 1.1697999  | 16.3338    |
| DD85   | 198.01195  | 640.55676  | 91.1636    | 964.61304 | 90.38994   | 0.7470133  | 53.75881   | 14.478853  | 33.951782  |
| DD86   | 131.81432  | 554.98517  | 90.668304  | 959.26184 | 71.44379   | 3.596964   | 65.51885   | 13.070213  | 4.0408006  |
| DD83   | 140.22942  | 568.8365   | 91.220146  | 1051.829  | 82.021904  | 1.1913501  | 72.32988   | 21.165598  | 12.998468  |
| DD41   | 138.36769  | 648.7202   | 82.80888   | 953.6065  | 66.11495   | 0.9374688  | 59.664227  | 16.673197  | 3.0964587  |
| DD42   | 128.26787  | 625.73224  | 90.275085  | 797.8028  | 102.01804  | 4.3958673  | 62.97678   | 2.975465   | 6.3422832  |
| DD43   | 155.8984   | 406.27267  | 89.3396    | 629.04895 | 60.830982  | 5.145239   | 40.08992   | 2.5458443  | 21.419317  |
| DD44   | 98.58003   | 525.3322   | 84.87416   | 919.31616 | 77.99994   | 2.913356   | 74.35515   | 12.562504  | 3.342277   |
| DD87   | 109.1511   | 592.27594  | 129.36711  | 921.42725 | 71.79176   | 0.6797097  | 52.03433   | 14.090273  | 21.528131  |
| DD2    | 96.78686   | 497.3815   | 147.52005  | 568.2834  | 95.4008    | 0.8136854  | 37.96813   | 3.0653644  | 17.672462  |
| DD3    | 161.34798  | 582.4004   | 86.18426   | 654.7011  | 71.45797   | 1.2363175  | 58.123737  | 18.85381   | 6.997898   |
| DD89   | 176.80461  | 673.34796  | 123.73686  | 643.7585  | 35.66944   | 1.6191603  | 48.466167  | 6.273023   | 3.0526602  |
| DD90   | 204.15343  | 717.20123  | 123.27988  | 579.20197 | 62.507015  | 6.5691156  | 57.93992   | 18.271687  | 25.131044  |
| DD4    | 132.28432  | 563.49164  | 136.11319  | 810.4517  | 64.03862   | 8.103034   | 53.061386  | 14.01761   | 26.585503  |
| DD47   | 123.83855  | 576.64624  | 174.05804  | 459.92395 | 58.06841   | 9.510375   | 48.782883  | 3.3685255  | 31.39097   |
| DD48   | 108.73606  | 403.20932  | 138.26302  | 321.9135  | 62.897587  | 1.6455939  | 60.445004  | 2.0291417  | 15.049494  |
| DD49   | 218.10983  | 899.0909   | 92.37307   | 572.5452  | 58.203396  | 9.1829405  | 41.680443  | 7.1490126  | 29.347612  |
| DD50   | 185.82562  | 669.1391   | 211.7435   | 526.89886 | 51.181446  | 1.411528   | 56.362522  | 3.4960358  | 4.967356   |
| DD46   | 162.73895  | 706.1766   | 137.64897  | 470.2537  | 76.32632   | 2.4957566  | 52.230682  | 24.955406  | 35.062782  |
| DD6    | 162.71759  | 702.0808   | 132.9383   | 585.061   | 54.790718  | 0.7943384  | 51.949806  | 20.800358  | 9.850317   |
| DD7    | 177.33914  | 694.34863  | 129.20343  | 479.50006 | 60.183266  | 11.359632  | 43.989147  | 7.6771884  | 11.876537  |
| DD8    | 173.5541   | 714.5257   | 118.55514  | 610.1471  | 72.25381   | 1.4298817  | 37.299927  | 19.688908  | 20.644197  |
| DD5    | 121.0003   | 492.8669   | 77.0271    | 446.33173 | 42.763145  | 8.004278   | 54.876984  | 7.0007954  | 21.43148   |
| DD9    | 172.12126  | 687.1227   | 153.70844  | 648.0849  | 54.395443  | 3.768175   | 54.197838  | 5.8182726  | 20.15701   |
| DD103  | 1330.4482  | 51.466896  | 63.282986  | 1616.8557 | 25.459084  | 25.149109  | 181.82881  | 104.71169  | 99.358055  |
| DD101  | 842.2907   | 40.149963  | 38.839684  | 4281.9297 | 35.49673   | 3.560345   | 215.76248  | 144.7838   | 80.61758   |
| DD102  | 1021.733   | 51.86373   | 105.82391  | 1122.0454 | 29.36182   | 1.030538   | 174.71687  | 14.959713  | 112.82615  |
| DD105  | 967.7143   | 48.769993  | 33.24892   | 931.06683 | 42.38026   | 6.3966656  | 161.38838  | 69.99525   | 97.4869    |
| DD106  | 851.83624  | 53.04692   | 31.741093  | 2605.2397 | 27.777891  | 12.680632  | 196.65009  | 123.65848  | 68.80863   |
| DD62   | 725.9936   | 14.363203  | 86.78339   | 694.1499  | 26.407318  | 6.0751877  | 106.90698  | 148.16176  | 104.63991  |
| DD64   | 804.6824   | 45.793106  | 32.74513   | 2811.3943 | 41.83589   | 42.052036  | 129.44873  | 345.70255  | 121.15761  |
| DD107  | 811.1178   | 33.57041   | 32.597336  | 2210.6592 | 39.483257  | 1.2061735  | 83.69041   | 146.55327  | 100.52117  |
| DD108  | 822.2376   | 22.569805  | 73.20951   | 970.57385 | 30.008234  | 26.410976  | 193.54134  | 193.59846  | 90.65846   |
| DD63   | 836.0975   | 27.396183  | 93.84951   | 637.48694 | 28.800991  | 64.90596   | 233.19035  | 176.2923   | 109.73678  |
| DD23   | 1020.9202  | 37.657516  | 61.508366  | 2374.6692 | 21.225592  | 57.565063  | 114.52194  | 205.23157  | 87.81999   |
| DD24   | 1067.7212  | 52.762783  | 35.25322   | 475.49994 | 7.3626723  | 0.6100225  | 171.22964  | 153.72134  | 102.15492  |
| DD110  | 648.2717   | 27.950481  | 30.923218  | 1359.2147 | 48.52524   | 33.50193   | 214.25624  | 207.54059  | 113.67352  |
| DD22   | 625.4808   | 64.59226   | 57.961815  | 1397.091  | 43.649746  | 8.919445   | 194.60294  | 167.77525  | 95.75349   |
| DD109  | 698.51074  | 41.02293   | 94.905556  | 905.8246  | 53.00819   | 39.010296  | 51.12407   | 165.87115  | 89.9795    |
| DD65   | 1326.119   | 97.08457   | 65.63276   | 1576.8842 | 22.620531  | 0.5872454  | 178.27571  | 245.42549  | 92.0139    |
| DD66   | 917.1747   | 37.613716  | 68.10222   | 3012.0774 | 22.67777   | 48.890358  | 242.87451  | 177.17932  | 78.970505  |
| DD67   | 815.70703  | 39.068237  | 31.553185  | 656.0904  | 28.328913  | 7.3960857  | 37.2889    | 146.12749  | 84.26315   |
| DD69   | 931.7619   | 48.6921    | 91.094284  | 1357.5046 | 33.443428  | 0.7469735  | 93.383965  | 126.08033  | 73.63583   |
| DD68   | 1045.516   | 53.84162   | 58.003002  | 3080.7727 | 16.10526   | 4.547997   | 217.48793  | 125.31595  | 78.345276  |
| DD25   | 944.9543   | 44.122864  | 94.33257   | 2148.5361 | 47.183044  | 49.174244  | 94.323845  | 203.66351  | 85.951706  |
| DD28   | 1053.7012  | 57.262695  | 130.97166  | 526.1232  | 20.21692   | 18.918043  | 124.20936  | 252.78976  | 51.4841    |
| DD29   | 863.9172   | 68.2931    | 57.894646  | 1096.0115 | 29.059673  | 13.280428  | 92.15386   | 145.38693  | 81.23544   |
| DD27   | 833.3722   | 69.858536  | 53.371716  | 3635.3154 | 34.941364  | 98.36337   | 103.42623  | 329.87558  | 58.00703   |
| DD30   | 1195.5168  | 87.4433    | 74.04354   | 2222.5095 | 31.38041   | 64.68907   | 152.23366  | 238.23203  | 73.60582   |

## Cont'd Supplementary Table 2

| Animal | 1370597_at | 1370511_at | 1370463_x_ | 1370428_x_ | 1370382_at | 1370359_at | 1370355_at | 1370350_x_ | 1370224_at |
|--------|------------|------------|------------|------------|------------|------------|------------|------------|------------|
| DD81   | 15.734759  | 1.2252947  | 297.2537   | 20.55449   | 16.83491   | 69.22978   | 136.94974  | 15.402633  | 43.45683   |
| DD84   | 13.536737  | 6.777505   | 278.4002   | 13.023332  | 4.3103914  | 71.8415    | 198.52281  | 0.557637   | 50.124756  |
| DD85   | 12.412727  | 2.2755272  | 313.54727  | 9.61531    | 17.578966  | 93.50415   | 110.51277  | 1.1421999  | 64.07018   |
| DD86   | 15.008025  | 0.9464194  | 298.35385  | 16.282696  | 12.190157  | 70.727036  | 213.01164  | 7.244365   | 40.88237   |
| DD83   | 5.3945036  | 13.526459  | 263.77478  | 17.563362  | 32.882088  | 104.68351  | 120.33746  | 3.1260967  | 50.216354  |
| DD41   | 3.0317109  | 3.8902411  | 297.1542   | 22.40215   | 27.525316  | 173.97575  | 99.36108   | 6.8172636  | 69.42949   |
| DD42   | 3.7570708  | 1.337356   | 298.74976  | 7.3455534  | 10.125551  | 140.31677  | 236.63905  | 5.306284   | 58.658962  |
| DD43   | 18.662071  | 1.009074   | 317.26102  | 12.968219  | 23.43754   | 196.642    | 275.7226   | 11.228218  | 55.41552   |
| DD44   | 8.611589   | 10.565583  | 264.9297   | 22.464722  | 18.327375  | 146.89392  | 352.49496  | 1.6500072  | 62.21181   |
| DD87   | 20.212563  | 1.5601206  | 292.2016   | 27.986698  | 9.959439   | 140.0687   | 133.24136  | 6.402635   | 41.32859   |
| DD2    | 10.161143  | 11.225462  | 284.65552  | 25.835052  | 3.2131326  | 120.84396  | 5.8315625  | 6.748598   | 50.882404  |
| DD3    | 1.987714   | 1.4594523  | 296.79987  | 6.7903585  | 4.67605    | 139.92984  | 30.574947  | 1.5062962  | 38.89302   |
| DD89   | 12.598504  | 3.3132844  | 249.03441  | 7.8168902  | 29.524391  | 139.33778  | 20.524782  | 5.1455445  | 52.574577  |
| DD90   | 4.716253   | 1.0970995  | 260.30835  | 22.374546  | 6.072775   | 146.10663  | 4.3425226  | 6.605271   | 48.638496  |
| DD4    | 6.782253   | 22.57785   | 265.9666   | 17.939943  | 17.093338  | 120.37192  | 23.041765  | 38.49405   | 23.667221  |
| DD47   | 2.161546   | 17.389566  | 184.82126  | 18.910343  | 4.4605794  | 136.21368  | 35.57364   | 13.97074   | 42.414116  |
| DD48   | 15.809993  | 10.315887  | 227.76585  | 7.3649974  | 12.411502  | 164.61302  | 28.622732  | 38.086376  | 116.18325  |
| DD49   | 4.79202    | 29.33708   | 256.6224   | 14.0393    | 1.6176353  | 151.7886   | 2.5746233  | 41.910526  | 30.830742  |
| DD50   | 2.348673   | 2.8891783  | 221.86476  | 14.874482  | 12.101675  | 144.43732  | 12.726518  | 19.541262  | 38.93548   |
| DD46   | 5.688384   | 25.032001  | 249.25276  | 0.9417977  | 24.45728   | 107.73801  | 26.380913  | 23.373655  | 64.154236  |
| DD6    | 2.7140434  | 20.505013  | 224.73969  | 14.100962  | 6.8883047  | 163.35983  | 26.042873  | 39.896633  | 39.90853   |
| DD7    | 9.162219   | 84.69913   | 225.28008  | 21.260113  | 11.626897  | 162.5991   | 52.491276  | 77.199165  | 22.975449  |
| DD8    | 14.891678  | 32.893806  | 218.83612  | 5.924764   | 11.286478  | 163.01283  | 11.874726  | 0.6004436  | 35.69921   |
| DD5    | 5.652938   | 57.529663  | 225.80261  | 12.299762  | 15.899886  | 184.98744  | 31.291971  | 21.552967  | 45.810745  |
| DD9    | 5.0125747  | 42.51664   | 209.49931  | 27.684273  | 14.308368  | 196.4035   | 27.731913  | 76.22907   | 38.556137  |
| DD103  | 31.839296  | 10.778116  | 51.176327  | 170.7925   | 43.796604  | 42.581078  | 1194.4988  | 13.101587  | 262.55814  |
| DD101  | 13.519045  | 17.62548   | 92.366806  | 3.0709815  | 60.136845  | 62.17129   | 942.87506  | 1.1253973  | 159.11298  |
| DD102  | 26.807224  | 9.586382   | 48.88469   | 390.99673  | 23.424814  | 52.660076  | 591.5792   | 0.4475398  | 238.03177  |
| DD105  | 32.776375  | 8.63303    | 32.214848  | 155.95457  | 47.18693   | 41.209232  | 1036.2866  | 1.1305209  | 205.82704  |
| DD106  | 14.474711  | 8.855827   | 125.36736  | 10.804118  | 61.59934   | 73.58452   | 534.1094   | 2.3988736  | 177.33838  |
| DD62   | 30.947092  | 17.847786  | 98.665596  | 284.6665   | 58.66137   | 47.74095   | 122.48196  | 0.3472207  | 125.94163  |
| DD64   | 10.463584  | 1.5186011  | 96.99782   | 17.004734  | 93.07338   | 75.17563   | 100.14766  | 0.6250326  | 111.47128  |
| DD107  | 15.701941  | 3.9066553  | 78.53694   | 300.36612  | 82.53658   | 73.56344   | 74.67509   | 6.8505836  | 219.47401  |
| DD108  | 36.06288   | 6.9403048  | 51.75098   | 299.274    | 63.14297   | 41.061703  | 122.68321  | 1.3874658  | 131.00864  |
| DD63   | 28.365847  | 4.479376   | 51.0095    | 320.0341   | 90.71993   | 69.70262   | 151.62292  | 7.7172456  | 144.08722  |
| DD23   | 3.8041542  | 9.774833   | 53.265755  | 245.10161  | 70.45936   | 78.64193   | 133.1955   | 15.222193  | 149.68953  |
| DD24   | 28.234388  | 1.5228152  | 97.795235  | 207.52899  | 78.02361   | 39.580635  | 438.11676  | 21.487494  | 428.67328  |
| DD110  | 25.233196  | 6.155466   | 78.02073   | 243.93208  | 84.11372   | 43.199398  | 176.01062  | 10.182517  | 146.23184  |
| DD22   | 8.947171   | 90.358574  | 138.43855  | 219.34909  | 65.568054  | 122.05265  | 141.89743  | 77.28353   | 187.75372  |
| DD109  | 17.203074  | 38.17562   | 97.49644   | 249.1306   | 51.45562   | 79.98076   | 121.36992  | 51.37084   | 164.90346  |
| DD65   | 24.663748  | 22.336748  | 123.05497  | 1.2409477  | 108.00179  | 13.186814  | 51.532543  | 42.9481    | 412.2169   |
| DD66   | 13.619452  | 97.631004  | 77.10942   | 12.253094  | 85.9714    | 88.44381   | 485.45175  | 79.66006   | 384.31873  |
| DD67   | 36.963673  | 69.928024  | 85.63438   | 258.74335  | 57.844112  | 116.37993  | 285.91846  | 20.153234  | 107.244    |
| DD69   | 2.0327377  | 25.30417   | 112.09446  | 253.11255  | 42.165802  | 50.055054  | 40.92269   | 86.425934  | 271.103    |
| DD68   | 26.322596  | 108.61885  | 69.65642   | 216.69951  | 40.251198  | 108.06353  | 113.83791  | 113.44901  | 91.402466  |
| DD25   | 16.77158   | 36.25387   | 101.77291  | 241.50194  | 24.80282   | 60.667736  | 98.98659   | 25.825079  | 204.08617  |
| DD28   | 13.16799   | 48.10537   | 81.48785   | 13.229024  | 67.58505   | 72.90008   | 49.423153  | 52.56046   | 122.37203  |
| DD29   | 17.365347  | 35.897083  | 91.43663   | 259.64252  | 45.89676   | 64.23786   | 114.72342  | 55.022324  | 150.06308  |
| DD27   | 19.0764    | 18.64493   | 60.329563  | 9.050778   | 77.06657   | 62.2984    | 95.504845  | 49.340523  | 160.97607  |
| DD30   | 34.082363  | 33.91004   | 39.99027   | 10.762308  | 95.79822   | 40.303677  | 47.280857  | 27.187328  | 177.97716  |

## Cont'd Supplementary Table 2

| Animal | 1370176_at | 1370114_a_ | 1370047_at | 1370007_at | 1369836_at | 1369727_at | 1369716_s_ | 1369680_at | 1369663_at |
|--------|------------|------------|------------|------------|------------|------------|------------|------------|------------|
| DD81   | 415.01797  | 2.8666027  | 66.07713   | 146.254    | 142.6712   | 3.705298   | 282.46423  | 31.590837  | 38.074314  |
| DD84   | 434.43503  | 23.548609  | 107.48052  | 214.85733  | 97.064125  | 4.339865   | 356.67963  | 16.846119  | 26.606844  |
| DD85   | 426.44647  | 10.257669  | 107.47704  | 176.75317  | 151.36607  | 3.6564343  | 340.97412  | 23.922472  | 52.8277    |
| DD86   | 450.38437  | 4.06745    | 68.70847   | 221.53378  | 115.70957  | 6.4994974  | 371.723    | 22.30144   | 4.8943095  |
| DD83   | 459.06226  | 1.8840632  | 86.55624   | 174.96732  | 111.21977  | 6.99885    | 376.54572  | 44.413406  | 58.693653  |
| DD41   | 871.03125  | 2.4354823  | 81.21301   | 139.36906  | 133.67372  | 2.018876   | 374.12085  | 32.142372  | 35.78532   |
| DD42   | 811.8826   | 2.2146509  | 92.332504  | 135.66931  | 105.12247  | 15.238427  | 285.97446  | 15.306186  | 31.225548  |
| DD43   | 775.8152   | 15.654809  | 107.58583  | 146.38795  | 97.24976   | 5.4759245  | 337.68854  | 26.383442  | 28.864586  |
| DD44   | 607.9766   | 3.0931952  | 97.70941   | 207.2989   | 139.8115   | 12.452456  | 424.2733   | 19.004896  | 28.668293  |
| DD87   | 775.2081   | 11.987271  | 80.0492    | 127.41255  | 139.06075  | 5.6162076  | 424.15436  | 45.370922  | 34.504597  |
| DD2    | 629.64844  | 34.04993   | 111.88722  | 104.62107  | 97.75294   | 5.320936   | 413.89578  | 20.153576  | 52.810364  |
| DD3    | 1226.5631  | 5.0073485  | 112.83691  | 169.2628   | 89.84066   | 4.8955564  | 380.15884  | 20.000525  | 22.159613  |
| DD89   | 1472.9807  | 4.211415   | 115.09909  | 157.2371   | 75.28419   | 2.695053   | 352.44754  | 8.371176   | 29.277702  |
| DD90   | 1343.4056  | 2.8550856  | 101.77271  | 165.02571  | 90.49806   | 7.1529865  | 310.14145  | 37.20861   | 20.14224   |
| DD4    | 1078.3414  | 22.107319  | 109.84243  | 150.30226  | 95.95799   | 61.68419   | 309.36755  | 22.244448  | 35.05277   |
| DD47   | 835.0272   | 10.31483   | 62.071095  | 157.40488  | 70.09872   | 12.977373  | 290.3432   | 10.973906  | 27.890263  |
| DD48   | 509.57877  | 9.123061   | 65.00364   | 167.16273  | 77.71308   | 19.557728  | 210.86362  | 29.45585   | 33.609863  |
| DD49   | 1060.925   | 2.7449417  | 96.11527   | 147.06729  | 52.412144  | 83.774254  | 266.08682  | 18.818943  | 43.278965  |
| DD50   | 1016.6655  | 2.523522   | 100.58324  | 152.08958  | 56.14218   | 6.1631413  | 240.88495  | 17.05706   | 22.090044  |
| DD46   | 1115.6815  | 4.820154   | 123.59226  | 150.25331  | 124.72511  | 30.020327  | 260.69434  | 36.909336  | 31.13186   |
| DD6    | 1111.8593  | 6.2221236  | 75.14356   | 120.46858  | 63.583973  | 52.50464   | 241.32465  | 30.42856   | 18.163044  |
| DD7    | 1046.4304  | 4.519025   | 129.55287  | 155.99767  | 61.891174  | 221.67606  | 194.41634  | 17.769535  | 31.72739   |
| DD8    | 1063.1681  | 2.6154056  | 68.471344  | 113.1117   | 59.8911    | 55.119255  | 232.22282  | 16.52227   | 39.243496  |
| DD5    | 674.49115  | 27.654789  | 88.90539   | 165.60246  | 78.86898   | 103.92159  | 232.21065  | 26.937323  | 29.95776   |
| DD9    | 801.73193  | 4.4707766  | 74.255486  | 133.52995  | 66.48305   | 146.36142  | 251.39958  | 17.138472  | 5.639685   |
| DD103  | 1033.3175  | 40.53193   | 66.09811   | 90.58725   | 21.227798  | 9.626888   | 144.30078  | 49.607033  | 225.14629  |
| DD101  | 300.84732  | 60.228565  | 72.32271   | 85.68317   | 39.508545  | 24.719404  | 118.30423  | 61.708843  | 219.07999  |
| DD102  | 939.35754  | 99.92115   | 72.61028   | 135.88052  | 31.577578  | 6.029231   | 157.02937  | 68.372345  | 105.88506  |
| DD105  | 314.55057  | 107.39025  | 78.30689   | 138.76247  | 57.774197  | 1.5825548  | 124.26578  | 68.04728   | 104.45525  |
| DD106  | 334.1888   | 86.783356  | 83.91647   | 95.664856  | 36.772938  | 4.2319574  | 101.01572  | 58.833866  | 214.43228  |
| DD62   | 295.3705   | 94.99992   | 67.4553    | 131.62794  | 39.957302  | 4.1659446  | 159.03387  | 55.27753   | 171.9246   |
| DD64   | 405.9985   | 132.34914  | 63.47776   | 63.315746  | 57.559597  | 15.302665  | 159.68472  | 50.029327  | 371.3415   |
| DD107  | 415.84396  | 89.00324   | 62.593636  | 89.799255  | 45.290607  | 16.50928   | 123.54414  | 73.402245  | 164.10864  |
| DD108  | 278.32916  | 74.25891   | 65.406364  | 69.58356   | 35.972504  | 25.100096  | 108.6624   | 28.799976  | 280.42917  |
| DD63   | 400.66614  | 108.21088  | 71.06346   | 105.0258   | 39.49204   | 34.111217  | 131.13235  | 47.230774  | 226.33778  |
| DD23   | 313.33072  | 86.23892   | 37.85332   | 71.486015  | 27.541147  | 23.731009  | 82.474594  | 42.742336  | 151.97638  |
| DD24   | 744.89777  | 110.17143  | 38.28528   | 95.9219    | 44.30215   | 9.600944   | 85.00452   | 61.545883  | 188.38326  |
| DD110  | 316.0933   | 97.34562   | 53.967754  | 43.63736   | 28.0912    | 6.6345706  | 70.972176  | 56.53859   | 172.36362  |
| DD22   | 484.71643  | 111.76947  | 51.074726  | 78.508575  | 46.144966  | 140.89806  | 100.33606  | 57.773464  | 249.61232  |
| DD109  | 545.8615   | 96.980225  | 54.224827  | 77.93415   | 24.290937  | 107.63334  | 94.02012   | 49.884193  | 207.448    |
| DD65   | 384.2891   | 59.19702   | 51.757164  | 68.30252   | 14.471982  | 66.91597   | 91.982765  | 86.29713   | 261.1342   |
| DD66   | 274.44748  | 70.0692    | 33.31926   | 128.10849  | 25.901499  | 237.95827  | 108.21008  | 57.313057  | 318.12177  |
| DD67   | 519.0626   | 62.559097  | 39.69168   | 6.4054575  | 21.812733  | 141.081    | 125.61811  | 62.023224  | 129.68758  |
| DD69   | 293.6284   | 149.38004  | 32.3223    | 94.26933   | 40.157547  | 73.388565  | 93.743805  | 51.937687  | 258.52014  |
| DD68   | 598.7198   | 80.417465  | 36.83633   | 93.91435   | 5.435328   | 251.07242  | 111.33492  | 63.03653   | 198.06555  |
| DD25   | 210.2449   | 89.5357    | 33.25413   | 46.85717   | 24.517647  | 46.244846  | 101.16335  | 71.16524   | 149.93498  |
| DD28   | 225.03813  | 82.680176  | 30.518383  | 99.69106   | 21.4641    | 99.767235  | 89.940025  | 41.984238  | 291.7159   |
| DD29   | 601.46735  | 76.82424   | 47.517715  | 104.70216  | 24.592762  | 112.60885  | 85.05058   | 70.01561   | 336.98434  |
| DD27   | 539.99615  | 16.466557  | 38.737305  | 69.32882   | 15.314151  | 89.756165  | 99.82478   | 98.520065  | 292.84042  |
| DD30   | 262.99567  | 38.207172  | 37.432354  | 43.066307  | 28.259825  | 36.512623  | 106.21369  | 56.575794  | 141.68423  |

## Cont'd Supplementary Table 2

| Animal | 1369595_at | 1369577_at | 1369522_a_ | 1369502_a_ | 1369215_a_ | 1369110_x_ | 1369097_s_ | 1369050_at | 1368983_at |
|--------|------------|------------|------------|------------|------------|------------|------------|------------|------------|
| DD81   | 15.059214  | 52.97109   | 6.6461     | 87.19008   | 85.08947   | 272.09937  | 60.82284   | 56.530746  | 179.57864  |
| DD84   | 13.722804  | 46.294125  | 11.627119  | 73.95666   | 80.708176  | 443.869    | 44.777424  | 27.774223  | 115.8705   |
| DD85   | 6.741615   | 12.136135  | 6.761521   | 92.810875  | 75.57828   | 319.77615  | 47.230595  | 48.867588  | 90.13755   |
| DD86   | 10.790136  | 51.047794  | 8.161403   | 72.424995  | 74.13816   | 322.55914  | 28.573996  | 42.15679   | 160.23904  |
| DD83   | 19.276672  | 39.622566  | 10.604154  | 108.9204   | 93.495865  | 297.995    | 51.189598  | 62.472954  | 114.4108   |
| DD41   | 7.7250886  | 22.445395  | 11.339891  | 180.07715  | 180.28784  | 328.9014   | 42.27576   | 50.012196  | 199.03207  |
| DD42   | 10.380667  | 40.53576   | 13.264357  | 159.86913  | 201.353    | 341.54984  | 31.63829   | 48.508476  | 127.55235  |
| DD43   | 5.5444074  | 31.981379  | 4.5046554  | 180.94586  | 273.73312  | 331.42474  | 29.519392  | 30.12532   | 203.89713  |
| DD44   | 11.876006  | 72.26788   | 8.4068775  | 147.5144   | 164.13852  | 348.73203  | 43.419193  | 49.589375  | 170.86436  |
| DD87   | 6.9715753  | 28.56477   | 10.073063  | 141.6283   | 199.35515  | 292.06647  | 35.37466   | 49.683117  | 141.96724  |
| DD2    | 29.949814  | 36.564926  | 10.244342  | 128.41637  | 202.84583  | 358.63083  | 50.850914  | 131.19246  | 111.86629  |
| DD3    | 13.52562   | 35.9159    | 16.117258  | 192.10284  | 364.9666   | 276.96957  | 30.177286  | 77.68158   | 149.126    |
| DD89   | 15.637042  | 53.295666  | 7.408819   | 197.00227  | 468.37524  | 282.15735  | 26.233274  | 88.604256  | 73.41643   |
| DD90   | 15.349641  | 29.330795  | 11.881733  | 162.66324  | 403.80902  | 267.52722  | 30.080906  | 119.57235  | 124.85674  |
| DD4    | 14.359154  | 36.73657   | 7.485134   | 163.0527   | 335.98654  | 307.5868   | 52.55512   | 78.93182   | 120.23955  |
| DD47   | 5.531189   | 39.784893  | 10.877743  | 189.09343  | 202.90894  | 316.0099   | 25.308935  | 122.29707  | 90.56009   |
| DD48   | 11.392648  | 22.017578  | 3.60593    | 178.68796  | 273.279    | 304.45837  | 43.868908  | 107.55032  | 106.31453  |
| DD49   | 9.861431   | 7.2578626  | 2.5581036  | 204.89961  | 230.17337  | 437.51773  | 23.849897  | 117.60288  | 77.8899    |
| DD50   | 12.315029  | 43.264637  | 13.938819  | 169.16385  | 289.13715  | 313.91165  | 44.500553  | 202.12373  | 61.51079   |
| DD46   | 16.906239  | 11.042373  | 9.461282   | 130.87738  | 349.0688   | 248.10469  | 34.881668  | 106.8747   | 97.99092   |
| DD6    | 14.694237  | 28.589048  | 7.904232   | 202.00153  | 334.5394   | 309.90857  | 62.65264   | 161.49605  | 69.435776  |
| DD7    | 12.467702  | 3.2531219  | 10.069884  | 217.4582   | 299.8171   | 309.23083  | 36.81685   | 143.83951  | 118.88076  |
| DD8    | 11.57685   | 21.08076   | 3.5643613  | 184.15709  | 235.149    | 233.72668  | 45.02067   | 96.59039   | 66.02712   |
| DD5    | 10.808523  | 45.780777  | 9.33639    | 159.69327  | 321.07428  | 302.60522  | 42.594944  | 141.68715  | 96.75537   |
| DD9    | 14.606596  | 18.793932  | 12.133856  | 197.89825  | 203.3307   | 270.44363  | 36.85731   | 167.56982  | 73.15357   |
| DD103  | 4.843996   | 33.785698  | 8.1138     | 32.927788  | 604.7524   | 122.96127  | 116.45768  | 31.971682  | 103.55539  |
| DD101  | 6.52218    | 86.369774  | 5.6194005  | 69.36569   | 534.9395   | 73.17103   | 108.00147  | 41.606087  | 64.17182   |
| DD102  | 7.162229   | 56.78902   | 14.19756   | 47.82464   | 689.3253   | 140.34773  | 107.09296  | 24.762316  | 83.529655  |
| DD105  | 8.669123   | 101.2447   | 7.496957   | 35.575294  | 559.21625  | 75.58811   | 110.20363  | 25.49291   | 94.710495  |
| DD106  | 10.646806  | 38.564434  | 7.771052   | 58.488827  | 629.6885   | 98.28712   | 124.73565  | 50.7949    | 72.008606  |
| DD62   | 5.693586   | 174.59727  | 19.286993  | 39.37678   | 353.23593  | 97.499565  | 104.84329  | 35.474865  | 115.61716  |
| DD64   | 17.802567  | 155.24284  | 7.050344   | 77.9623    | 409.76648  | 125.41495  | 73.61381   | 58.273926  | 59.555355  |
| DD107  | 13.763438  | 135.03525  | 13.036609  | 87.03465   | 441.86505  | 86.99241   | 92.964615  | 21.523176  | 121.67571  |
| DD108  | 15.425682  | 130.52733  | 4.597609   | 53.405125  | 391.56567  | 71.2312    | 77.81746   | 45.956974  | 46.50579   |
| DD63   | 6.150824   | 145.24197  | 3.7332196  | 45.20594   | 440.47147  | 123.18102  | 80.06169   | 42.377594  | 51.767193  |
| DD23   | 3.5276287  | 66.16421   | 5.237835   | 102.53008  | 843.9107   | 102.96198  | 88.40898   | 39.070557  | 36.683685  |
| DD24   | 14.251473  | 106.9337   | 2.2219725  | 55.375122  | 1082.7738  | 78.40717   | 78.668465  | 28.319513  | 90.33793   |
| DD110  | 18.84477   | 157.85715  | 6.1583643  | 58.0594    | 477.25186  | 80.63836   | 81.03223   | 31.586636  | 75.64999   |
| DD22   | 10.175497  | 115.95311  | 1.2242495  | 139.51286  | 495.3074   | 118.62381  | 76.01983   | 53.811966  | 39.52243   |
| DD109  | 19.124172  | 110.66916  | 14.682685  | 86.87657   | 561.223    | 87.86446   | 70.76916   | 31.471798  | 43.30602   |
| DD65   | 0.996841   | 29.530422  | 9.271702   | 28.182863  | 1223.7803  | 56.34086   | 52.001797  | 33.08303   | 31.99538   |
| DD66   | 17.359844  | 68.883446  | 0.6839055  | 137.31085  | 928.84784  | 104.82174  | 54.898556  | 30.51938   | 63.34233   |
| DD67   | 1.698133   | 109.67732  | 7.4591947  | 111.93028  | 482.60864  | 117.22391  | 57.475063  | 23.495974  | 52.60648   |
| DD69   | 2.4048042  | 100.21829  | 3.3538861  | 61.10378   | 944.22345  | 108.25756  | 71.24509   | 54.28196   | 25.25869   |
| DD68   | 14.306046  | 97.678856  | 6.364954   | 117.81639  | 815.5252   | 75.54127   | 70.246506  | 52.884026  | 32.74592   |
| DD25   | 6.2653165  | 95.26112   | 9.181273   | 66.82344   | 619.0676   | 120.22781  | 79.09215   | 22.823553  | 59.01305   |
| DD28   | 5.892836   | 87.67263   | 8.488132   | 96.78119   | 703.265    | 99.47261   | 81.93782   | 34.920635  | 58.2577    |
| DD29   | 9.751015   | 168.37215  | 10.297233  | 97.192566  | 790.4851   | 95.69574   | 69.70528   | 42.063385  | 34.287987  |
| DD27   | 13.172187  | 106.52519  | 0.2587994  | 69.08613   | 714.7646   | 138.35939  | 73.93805   | 48.51292   | 50.336422  |
| DD30   | 2.4759932  | 47.04493   | 6.3535986  | 49.95619   | 907.4213   | 102.12201  | 89.08893   | 54.25334   | 24.683254  |

## Cont'd Supplementary Table 2

| Animal | 1368872_a_ | 1368826_at | 1368696_at | 1368690_a_ | 1368593_at | 1368440_at | 1368419_at | 1368418_a_ | 1368335_at |
|--------|------------|------------|------------|------------|------------|------------|------------|------------|------------|
| DD81   | 105.80319  | 316.54248  | 65.74891   | 74.23452   | 4.310996   | 127.19492  | 226.59082  | 196.08708  | 6.8250685  |
| DD84   | 103.75847  | 329.809    | 66.69984   | 71.73241   | 19.198082  | 134.52153  | 213.78049  | 218.27718  | 7.0379195  |
| DD85   | 110.11156  | 345.95673  | 62.241627  | 101.00526  | 39.38159   | 111.50678  | 208.8577   | 227.062    | 3.5800693  |
| DD86   | 116.72487  | 300.76074  | 65.31199   | 84.06324   | 43.23153   | 87.15885   | 220.91052  | 224.69437  | 2.2652256  |
| DD83   | 119.23962  | 346.3727   | 52.42453   | 67.67594   | 19.145617  | 129.96164  | 196.59424  | 199.67145  | 1.5778025  |
| DD41   | 127.11935  | 296.88757  | 26.574003  | 85.9035    | 25.153332  | 184.3861   | 266.93872  | 268.9149   | 1.5109025  |
| DD42   | 137.997    | 290.19095  | 33.622044  | 85.61138   | 12.101261  | 135.77164  | 270.5428   | 287.29898  | 1.1669137  |
| DD43   | 119.22492  | 271.32864  | 41.350693  | 50.630634  | 13.032091  | 184.97238  | 275.62656  | 276.46194  | 5.2112613  |
| DD44   | 111.77265  | 294.62103  | 36.629826  | 78.83241   | 22.9323    | 79.77225   | 217.15057  | 266.90247  | 3.0569882  |
| DD87   | 124.03085  | 298.11798  | 30.643055  | 68.814064  | 17.712105  | 113.83081  | 271.4287   | 261.74503  | 3.3992865  |
| DD2    | 94.62583   | 323.32654  | 35.120884  | 73.64552   | 13.27815   | 80.016495  | 182.49722  | 265.33884  | 5.924336   |
| DD3    | 103.13955  | 298.12933  | 21.652456  | 55.188766  | 6.3909855  | 82.428856  | 221.6512   | 237.05898  | 1.5679936  |
| DD89   | 85.545135  | 296.692    | 5.7018805  | 40.423866  | 23.134491  | 61.121624  | 215.3519   | 225.01543  | 4.7180734  |
| DD90   | 132.37323  | 297.45084  | 2.9442923  | 48.139507  | 24.599463  | 80.425026  | 270.73572  | 239.02356  | 1.79931    |
| DD4    | 99.15265   | 285.64474  | 26.689922  | 45.06676   | 12.955097  | 75.7865    | 208.34137  | 257.3722   | 17.728796  |
| DD47   | 98.53311   | 330.09988  | 3.523613   | 54.79683   | 13.522302  | 52.495777  | 223.19571  | 201.58151  | 3.619134   |
| DD48   | 66.30771   | 294.37485  | 8.183231   | 34.153023  | 18.095093  | 105.07678  | 264.55704  | 227.81116  | 11.156129  |
| DD49   | 57.861137  | 358.4956   | 34.429577  | 33.602207  | 20.498346  | 100.85561  | 290.19772  | 257.226    | 23.356722  |
| DD50   | 76.786064  | 341.4392   | 25.98978   | 69.23262   | 4.9110403  | 83.69134   | 213.02924  | 224.66992  | 15.423616  |
| DD46   | 77.88175   | 327.91748  | 19.03617   | 77.83935   | 27.681953  | 109.0902   | 243.25356  | 251.34279  | 4.603889   |
| DD6    | 94.4441    | 320.35944  | 32.547565  | 74.08218   | 22.85566   | 88.61007   | 261.1361   | 225.0595   | 7.396149   |
| DD7    | 63.29169   | 361.85715  | 38.380795  | 52.282238  | 20.33609   | 61.78055   | 233.75893  | 265.71255  | 72.81146   |
| DD8    | 68.10095   | 323.10278  | 13.657796  | 59.51464   | 18.511528  | 54.055737  | 237.44814  | 232.17664  | 12.32803   |
| DD5    | 103.63956  | 275.64282  | 2.221882   | 38.172768  | 12.930565  | 140.01923  | 290.0552   | 281.31113  | 33.70125   |
| DD9    | 80.87473   | 400.35355  | 14.235879  | 68.10791   | 40.125385  | 79.44285   | 271.2287   | 282.68225  | 40.02542   |
| DD103  | 175.83653  | 43.46405   | 155.48521  | 9.779166   | 60.637302  | 524.82544  | 122.01233  | 138.59428  | 9.677957   |
| DD101  | 180.70317  | 46.23336   | 94.90404   | 6.728492   | 79.87077   | 339.61926  | 91.83273   | 107.34026  | 17.693012  |
| DD102  | 214.85922  | 44.795967  | 140.78896  | 9.865724   | 106.50185  | 714.40424  | 100.00996  | 134.563    | 22.85963   |
| DD105  | 194.92877  | 41.91353   | 143.59972  | 10.006448  | 86.775795  | 410.92465  | 84.05058   | 115.36321  | 1.739334   |
| DD106  | 232.38739  | 42.87628   | 129.94572  | 9.70333    | 93.86343   | 429.05994  | 106.18137  | 77.62355   | 13.275338  |
| DD62   | 165.43605  | 171.52907  | 42.062405  | 14.59206   | 70.45698   | 596.2953   | 83.08151   | 100.09177  | 11.623852  |
| DD64   | 247.8659   | 49.30091   | 54.67678   | 3.8662226  | 65.19488   | 579.7755   | 94.64274   | 111.40361  | 16.155172  |
| DD107  | 208.32544  | 41.763214  | 56.6919    | 9.177223   | 52.69483   | 872.59863  | 73.05326   | 95.239525  | 9.953864   |
| DD108  | 142.98636  | 44.6117    | 74.94198   | 10.882317  | 99.951675  | 1059.9916  | 85.805786  | 125.14524  | 8.310354   |
| DD63   | 230.57918  | 56.958862  | 65.162766  | 7.8572426  | 101.88919  | 88.07486   | 92.690445  | 100.91911  | 6.1877065  |
| DD23   | 303.18933  | 100.06131  | 28.192305  | 17.171944  | 216.65987  | 238.87224  | 94.20025   | 101.13918  | 8.694222   |
| DD24   | 284.93777  | 108.33209  | 9.928788   | 23.644161  | 152.6865   | 55.53264   | 73.13637   | 88.129486  | 7.8943014  |
| DD110  | 139.41786  | 36.065575  | 49.779343  | 18.377827  | 187.9599   | 165.16069  | 108.87348  | 119.30969  | 5.889881   |
| DD22   | 200.87505  | 72.49344   | 45.263603  | 24.47911   | 210.80722  | 329.75095  | 131.05505  | 159.09904  | 86.99017   |
| DD109  | 161.42235  | 77.39837   | 48.80055   | 12.377452  | 170.18088  | 344.02576  | 78.8664    | 124.73402  | 34.36836   |
| DD65   | 289.27338  | 154.61713  | 52.13183   | 5.3636484  | 194.0645   | 617.2294   | 111.16975  | 105.13905  | 18.279215  |
| DD66   | 197.94778  | 144.78902  | 26.613577  | 18.208286  | 104.68681  | 147.9543   | 125.06546  | 142.5826   | 81.08538   |
| DD67   | 157.59749  | 34.571507  | 47.967102  | 17.910332  | 210.88168  | 622.67975  | 102.62223  | 120.711    | 126.23452  |
| DD69   | 255.70544  | 97.16384   | 43.22592   | 21.400549  | 117.01588  | 151.62663  | 81.91564   | 107.89256  | 33.23532   |
| DD68   | 318.20438  | 102.75121  | 37.78005   | 11.361006  | 235.60912  | 455.35422  | 90.067444  | 127.22039  | 87.339035  |
| DD25   | 335.48938  | 143.31834  | 84.31007   | 17.74037   | 239.78032  | 472.48184  | 108.03391  | 100.8621   | 7.0480976  |
| DD28   | 183.01843  | 147.0765   | 44.13634   | 13.242716  | 94.24765   | 478.18063  | 101.93945  | 115.15387  | 22.558237  |
| DD29   | 226.77264  | 293.36465  | 51.01362   | 8.552139   | 83.57625   | 469.77863  | 79.426895  | 109.75391  | 22.27101   |
| DD27   | 197.45547  | 268.40912  | 57.819027  | 18.629011  | 213.80553  | 216.36201  | 120.56002  | 109.08635  | 17.874296  |
| DD30   | 182.4369   | 263.85623  | 56.257015  | 11.066384  | 275.8576   | 559.0404   | 90.624435  | 84.00547   | 13.527626  |

## Cont'd Supplementary Table 2

| Animal | 1368321_at | 1368317_at | 1368290_at | 1368250_at | 1368128_at | 1368064_a_at |
|--------|------------|------------|------------|------------|------------|--------------|
| DD81   | 598.2864   | 72.886856  | 147.62784  | 2.1355953  | 2.6558518  | 200.98476    |
| DD84   | 469.36734  | 75.55627   | 150.90535  | 14.355214  | 1.9382167  | 174.85144    |
| DD85   | 250.91743  | 72.28433   | 89.900085  | 14.771371  | 1.8704269  | 177.02112    |
| DD86   | 274.27307  | 78.25793   | 128.77629  | 10.839173  | 5.7344713  | 207.37831    |
| DD83   | 328.58618  | 92.51328   | 157.95668  | 2.0651166  | 3.5736074  | 177.09334    |
| DD41   | 814.87396  | 112.91653  | 200.99487  | 13.698624  | 4.1328397  | 115.58849    |
| DD42   | 528.65936  | 113.24921  | 213.42278  | 13.947145  | 2.7998416  | 115.10111    |
| DD43   | 268.99115  | 121.32927  | 210.92604  | 14.610659  | 7.7442174  | 143.81247    |
| DD44   | 549.5256   | 135.91809  | 341.67633  | 15.824595  | 5.7906857  | 160.68132    |
| DD87   | 1101.3704  | 99.81795   | 317.61578  | 10.015398  | 8.433842   | 105.72651    |
| DD2    | 1428.7836  | 270.18265  | 623.24854  | 3.1444585  | 4.9672585  | 126.89727    |
| DD3    | 494.05457  | 209.76913  | 249.3103   | 7.1733046  | 8.289559   | 117.77696    |
| DD89   | 719.359    | 137.61057  | 306.53555  | 3.2708185  | 40.68749   | 132.96649    |
| DD90   | 734.84344  | 222.78313  | 206.16982  | 15.845266  | 43.57035   | 141.1811     |
| DD4    | 1353.0581  | 197.72792  | 535.27893  | 16.90566   | 44.505394  | 115.91954    |
| DD47   | 449.2659   | 132.4384   | 190.95474  | 1.072229   | 24.790195  | 111.42448    |
| DD48   | 1139.5476  | 180.41226  | 490.4592   | 8.021027   | 5.030649   | 149.95705    |
| DD49   | 765.6606   | 119.38648  | 163.87181  | 19.206652  | 40.172195  | 109.64149    |
| DD50   | 1433.2775  | 211.73148  | 546.3764   | 2.7724385  | 32.35497   | 82.94875     |
| DD46   | 1436.5806  | 146.62744  | 446.95844  | 8.670109   | 29.577978  | 113.67615    |
| DD6    | 560.9623   | 203.72997  | 122.87837  | 2.4282258  | 2.3017762  | 122.30704    |
| DD7    | 1113.5914  | 181.98544  | 324.3439   | 7.270617   | 48.032795  | 124.08305    |
| DD8    | 1041.9469  | 130.86966  | 331.06317  | 7.3242774  | 15.295797  | 99.16262     |
| DD5    | 698.6751   | 188.37526  | 222.97844  | 13.317093  | 68.52777   | 141.7065     |
| DD9    | 1235.1604  | 188.726    | 301.09625  | 1.7881956  | 37.308178  | 93.630615    |
| DD103  | 321.29434  | 103.15768  | 49.35431   | 27.245066  | 26.55339   | 184.74176    |
| DD101  | 417.71738  | 81.895805  | 55.661076  | 31.02527   | 18.17863   | 215.39966    |
| DD102  | 548.22943  | 83.73724   | 78.48586   | 41.158676  | 14.133469  | 55.04091     |
| DD105  | 305.41772  | 73.69714   | 76.48234   | 31.74328   | 6.921957   | 251.80052    |
| DD106  | 286.93353  | 80.73      | 28.196272  | 28.657633  | 10.524523  | 159.29373    |
| DD62   | 367.7626   | 95.32484   | 139.90417  | 22.38541   | 20.701828  | 65.80839     |
| DD64   | 1069.0054  | 96.76896   | 347.80905  | 12.498099  | 96.57833   | 37.490417    |
| DD107  | 666.53284  | 60.63392   | 174.59727  | 22.285587  | 62.541706  | 64.07051     |
| DD108  | 413.71497  | 59.835953  | 117.72685  | 31.26388   | 52.10905   | 78.48092     |
| DD63   | 428.32657  | 93.10378   | 154.07819  | 27.19569   | 60.777412  | 62.34939     |
| DD23   | 289.59598  | 73.459206  | 203.9461   | 2.4611893  | 125.29895  | 46.87573     |
| DD24   | 358.8401   | 109.11341  | 109.06618  | 31.864481  | 131.06876  | 56.563988    |
| DD110  | 207.20111  | 84.715225  | 210.59512  | 20.113546  | 174.61234  | 58.95267     |
| DD22   | 311.79086  | 77.59802   | 114.34276  | 38.7669    | 107.70132  | 77.891106    |
| DD109  | 419.59222  | 81.38669   | 126.81613  | 33.45878   | 52.549633  | 113.69241    |
| DD65   | 306.64847  | 48.54609   | 71.17918   | 25.757723  | 109.85648  | 84.23693     |
| DD66   | 605.2743   | 64.6289    | 290.49643  | 45.04714   | 119.01446  | 41.86407     |
| DD67   | 581.80115  | 42.030933  | 57.584568  | 26.141266  | 113.94213  | 142.8912     |
| DD69   | 277.19305  | 86.95066   | 266.2504   | 39.973324  | 16.807917  | 31.030373    |
| DD68   | 247.81091  | 67.33106   | 36.61399   | 27.713165  | 95.887764  | 54.039375    |
| DD25   | 311.1576   | 78.13347   | 135.5786   | 40.37931   | 85.18623   | 58.149067    |
| DD28   | 765.64154  | 81.6073    | 37.469845  | 42.119545  | 92.22397   | 51.016483    |
| DD29   | 484.7069   | 71.67472   | 125.57748  | 30.146814  | 156.15703  | 9.746626     |
| DD27   | 392.0257   | 106.8031   | 26.57456   | 42.472088  | 74.7585    | 43.78592     |
| DD30   | 543.1      | 69.59911   | 24.19794   | 24.4392    | 49.65942   | 34.388794    |

**Supplementary Table 2:** Presents array data for the 395 probe sets identified as differentially regulated in liver from diabetic and control animals. Data are provided for each individual chip, which corresponds to an individual animal in the study. The column labeled Animal provides a unique internal identifier for each animal, which are then identified by strain (GK = Goto-Kakizaki; WKY = Wistar Kyoto) and age. Data are presented by probe set ID numbers. Functional characterization, as well as name and accession numbers for probe set IDs can be found in Supplementary Table 3.
