# Supplementary material
Source: PubMed Central journal article supplement (PMC3093670)
Supplement: NIHMS286972-supplement-03.pdf [file NIHMS286972-supplement-03.pdf]

## ON-LINE SUPPLEMENTARY TABLE

**Table 3. Differentially Expressed Probe Sets in Muscle Tissue of GK Rats.**

| <b>A. Immune/Inflammatory (45 probe sets, 43 genes)</b> |        |               |                                                                        |                  |           |                                                                                    |
|---------------------------------------------------------|--------|---------------|------------------------------------------------------------------------|------------------|-----------|------------------------------------------------------------------------------------|
| Age                                                     | Strain | Probe ID      | Gene Name                                                              | Symbol           | Accession | Gene Function                                                                      |
| 5                                                       | WKY    | 1368128_at    | phospholipase A2, group IIA                                            | <i>Pla2g2a</i>   | NM_031598 | mediator of the inflammatory process                                               |
| 5                                                       | WKY    | 1368593_at    | CD1d1 antigen                                                          | <i>Cd1; Cd1d</i> | NM_017079 | presentation of lipid antigens to T cells                                          |
| 5                                                       | WKY    | 1370382_at    | major histocompatibility antigen                                       | <i>Mhc</i>       | BI279526  | antigen processing and presentation                                                |
| 5                                                       | WKY    | 1371033_at    | major histocompatibility antigen                                       | <i>Mhc</i>       | A1715202  | antigen processing and presentation                                                |
| 5                                                       | WKY    | 1383449_at    | major histocompatibility antigen                                       | <i>Mhc</i>       | AA801218  | antigen processing and presentation                                                |
| 5                                                       | WKY    | 1388071_x_at  | major histocompatibility antigen                                       | <i>Mhc</i>       | M24024    | antigen processing and presentation                                                |
| 5                                                       | WKY    | 1388202_at    | major histocompatibility antigen                                       | <i>Mhc</i>       | BI395698  | antigen processing and presentation                                                |
| 5                                                       | WKY    | 1389734_x_at  | major histocompatibility antigen                                       | <i>Mhc</i>       | BI282965  | antigen processing and presentation                                                |
| 5                                                       | WKY    | 1393108_at    | major histocompatibility antigen                                       | <i>Mhc</i>       | BM387813  | antigen processing and presentation                                                |
| 5                                                       | WKY    | 1394846_at    | paired-Ig-like receptor A2                                             | <i>Pira2</i>     | AI237640  | immune regulator                                                                   |
| 5                                                       | WKY    | 1399073_at    | OTU domain, ubiquitin aldehyde binding 1                               | <i>Otub1</i>     | BI274378  | immune response and ubiquitin cycle                                                |
| 4                                                       | WKY    | 1369577_at    | suppressor of cytokine signaling 2                                     | <i>Socs2</i>     | NM_058208 | negative regulation of cytokine signal transduction                                |
| 4                                                       | WKY    | 1370428_x_at  | major histocompatibility antigen                                       | <i>Mhc</i>       | AJ249701  | antigen processing and presentation                                                |
| 4                                                       | WKY    | 1371209_at    | major histocompatibility antigen                                       | <i>Mhc</i>       | AJ243338  | antigen processing and presentation                                                |
| 4                                                       | WKY    | 1391463_at    | DEAD (Asp-Glu-Ala-Asp) box polypeptide 58                              | <i>Ddx58</i>     | AI575264  | innate immune defense against viruses                                              |
| 3                                                       | WKY    | 1373889_at    | immunoglobulin superfamily, member 7                                   | <i>Igsf7</i>     | BF387360  | cell signaling and immune regulation                                               |
| 3                                                       | WKY    | 1384345_at    | prostaglandin reductase 2                                              | <i>Ptgr2</i>     | AW527197  | inflammation repression                                                            |
| 3                                                       | WKY    | 1387839_at    | major histocompatibility antigen                                       | <i>Mhc</i>       | NM_012646 | antigen processing and presentation                                                |
| 3                                                       | WKY    | 1388102_at    | prostaglandin reductase 1                                              | <i>Ptgr1</i>     | U66322    | inflammation repression                                                            |
| 3                                                       | WKY    | 1388255_x_at  | major histocompatibility antigen                                       | <i>Mhc</i>       | AJ243338  | antigen processing and presentation                                                |
| 3                                                       | WKY    | 1389651_at    | apelin, AGTRL1 ligand                                                  | <i>Apln</i>      | AI177057  | inhibitory activity on HIV infection                                               |
| 3                                                       | WKY    | 1392172_at    | chemokine (C-C motif) ligand 9                                         | <i>Ccl9</i>      | AI169984  | activator of osteoclasts                                                           |
| 3                                                       | WKY    | 1395981_at    | activating signal cointegrator 1 complex subunit 3                     | <i>Ascc3</i>     | AW919934  | NF-kappa-B, SRF and AP1 transactivation                                            |
| 5                                                       | GK     | 1369110_x_at  | major histocompatibility antigen                                       | <i>Mhc</i>       | NM_012645 | antigen processing and presentation                                                |
| 5                                                       | GK     | 1369836_at    | interferon-induced protein with tetratricopeptide repeats 1            | <i>Ifft1</i>     | NM_020096 | immune response                                                                    |
| 5                                                       | GK     | 1370463_x_at  | major histocompatibility antigen                                       | <i>Mhc</i>       | U50449    | antigen processing and presentation                                                |
| 5                                                       | GK     | 1377334_at    | major histocompatibility antigen                                       | <i>Mhc</i>       | BG378249  | antigen processing and presentation                                                |
| 5                                                       | GK     | 1377950_at    | interferon-inducible GTPase                                            | <i>Iigp1</i>     | AA955213  | cell-autonomous immunity                                                           |
| 5                                                       | GK     | 1379818_at    | major histocompatibility antigen                                       | <i>Mhc</i>       | BF288109  | antigen processing and presentation                                                |
| 5                                                       | GK     | 1392308_at    | phospholipase A2, group IID                                            | <i>Pla2g2d</i>   | AI044869  | inflammatory response; lipid catabolism                                            |
| 5                                                       | GK     | *1394264_at   | N-acetylglucosamine 6-O-sulfotransferase                               | <i>Chst5</i>     | BF558607  | biosynthesis of L-selectin ligands                                                 |
| 5                                                       | GK     | 1396714_at    | phospholipase A2, activating protein                                   | <i>Plaa</i>      | BF394289  | regulation of specific inflammatory disease processes                              |
| 5                                                       | GK     | 1369716_s_at  | lectin, galactose binding, soluble 5                                   | <i>Lgals5</i>    | NM_012976 | signal transducer; induces Th1 death                                               |
| 5                                                       | GK     | 1379499_at    | lymphotoxin B                                                          | <i>Ltb</i>       | BF282228  | lymphotoxin signaling; immune response regulation                                  |
| 4                                                       | GK     | 1387366_at    | interleukin enhancer binding factor 3                                  | <i>Ilf3</i>      | NM_053412 | post-transcriptional regulation                                                    |
| 4                                                       | GK     | 1390562_s_at  | major histocompatibility antigen                                       | <i>Mhc</i>       | BE102350  | antigen processing and presentation                                                |
| 4                                                       | GK     | *1392444_at   | N-acetylglucosamine 6-O-sulfotransferase                               | <i>Chst5</i>     | AW531000  | biosynthesis of L-selectin ligands                                                 |
| 3                                                       | GK     | 1368983_at    | heparin-binding EGF-like growth factor                                 | <i>Hbegf</i>     | NM_012945 | macrophage-mediated cellular proliferation                                         |
| 3                                                       | GK     | 1369522_a_at  | CD244 molecule, natural killer cell receptor 2B4                       | <i>Cd244</i>     | NM_022259 | leukocyte & natural killer cell activation                                         |
| 3                                                       | GK     | 1371213_at    | major histocompatibility antigen                                       | <i>Mhc</i>       | AJ005023  | antigen processing and presentation                                                |
| 3                                                       | GK     | *1378163_at   | gremlin 2 homolog, cysteine knot superfamily                           | <i>Grem2</i>     | AA817956  | cytokine activity                                                                  |
| 3                                                       | GK     | *1380799_at   | gremlin 2 homolog, cysteine knot superfamily ( <i>Xenopus laevis</i> ) | <i>Grem2</i>     | BF388208  | cytokine activity                                                                  |
| 3                                                       | GK     | 1384888_at    | suppressor of cytokine signaling 7                                     | <i>Socs7</i>     | AI547911  | negative regulation of cytokine signal transduction                                |
| 3                                                       | GK     | 1385439_x_at  | DEXH (Asp-Glu-X-His) box polypeptide 58                                | <i>Dhx58</i>     | BF417541  | negative regulator of host innate immune defense                                   |
| 3                                                       | GK     | 1379965_at    | protein kinase C, epsilon                                              | <i>Prkce</i>     | BE113082  | lipopolysaccharide mediated signaling                                              |
| <b>B. Energy Metabolism (17 probe sets, 16 genes)</b>   |        |               |                                                                        |                  |           |                                                                                    |
| Age                                                     | Strain | Probe ID      | Gene Name                                                              | Symbol           | Accession | Gene Function                                                                      |
| 5                                                       | WKY    | 1369663_at    | epoxide hydrolase 2, cytoplasmic                                       | <i>Ephx2</i>     | NM_022936 | eicosanoid breakdown                                                               |
| 5                                                       | WKY    | 1371137_at    | acyl-coenzyme A oxidase 2, branched chain                              | <i>Acox2</i>     | X95189    | peroxisome beta oxidation of lipids                                                |
| 5                                                       | WKY    | 1379306_at    | mitochondrial ribosomal protein L48                                    | <i>MrpL48</i>    | BE111794  | structure constituents of mitochondria ribosomes                                   |
| 4                                                       | WKY    | 1368335_at    | apolipoprotein A-I                                                     | <i>ApoA-I</i>    | NM_012738 | cholesterol efflux                                                                 |
| 4                                                       | WKY    | 1370355_at    | stearyl-Coenzyme A desaturase 1                                        | <i>Scd1</i>      | J02585    | fatty acid metabolism                                                              |
| 3                                                       | WKY    | 1369727_at    | apolipoprotein A-II                                                    | <i>ApoA-II</i>   | NM_013112 | HDL metabolism                                                                     |
| 3                                                       | WKY    | 1379744_at    | serum amyloid A 4                                                      | <i>Saa4</i>      | AI137930  | apolipoprotein of the HDL complex                                                  |
| 3                                                       | WKY    | 1393139_at    | apolipoprotein C2                                                      | <i>ApoC-II</i>   | BM385272  | activator of triacylglycerol lipases                                               |
| 5                                                       | GK     | 1388603_a_at  | iron-sulfur cluster assembly 1 homolog ( <i>S. cerevisiae</i> )        | <i>Isca1</i>     | BM384289  | assembly of mitochondrial iron-sulfur proteins; biogenesis of iron-sulfur clusters |
| 5                                                       | GK     | 1388654_at    | mitochondrial ribosomal protein L52                                    | <i>MrpL52</i>    | AI409180  | structure constituents of mitochondria ribosomes                                   |
| 5                                                       | GK     | 1393421_at    | peroxisomal membrane protein 4                                         | <i>Pxmp4</i>     | BG664011  | fatty acid transporter; peroxisomal synthesis                                      |
| 4                                                       | GK     | *1369502_a_at | amylase 1, salivary                                                    | <i>Amy1a</i>     | NM_031502 | carbohydrate metabolism                                                            |

Table 3. Cont'd.

**B. Energy Metabolism (17 probe sets, 16 genes)**

| Age | Strain | Probe ID    | Gene Name                                       | Symbol        | Accession | Gene Function                          |
|-----|--------|-------------|-------------------------------------------------|---------------|-----------|----------------------------------------|
| 4   | GK     | *1370359_at | amylase 1, salivary                             | <i>Amy1a</i>  | AB057450  | carbohydrate metabolism                |
| 4   | GK     | 1374698_at  | cytochrome c oxidase polypeptide VIIa           | <i>Cox7a1</i> | AI709531  | mitochondrial respiratory chain        |
| 4   | GK     | 1382462_at  | L-2-hydroxyglutarate dehydrogenase              | <i>L2hgdh</i> | BF290937  | mitochondrial; oxidoreductase activity |
| 4   | GK     | 1389142_at  | sulfide:quinone oxidoreductase                  | <i>Sqrll</i>  | AI013361  | mitochondrial; oxidoreductase activity |
| 3   | GK     | 1390789_at  | acyl-coenzyme A dehydrogenase family, member 11 | <i>Acad11</i> | BI296347  | mitochondrial; oxidoreductase activity |

**C. Transcription/Translation (48 probe sets, 46 genes)**

| Age | Strain | Probe ID     | Gene Name                                                                                 | Symbol               | Accession | Gene Function                                                   |
|-----|--------|--------------|-------------------------------------------------------------------------------------------|----------------------|-----------|-----------------------------------------------------------------|
| 5   | WKY    | 1370224_at   | signal transducer and activator of transcription 3                                        | <i>Stat3</i>         | BE113920  | transcription factor; Jak/STAT3 pathway                         |
| 5   | WKY    | 1375664_at   | trinucleotide repeat containing 6                                                         | <i>Tnrc6</i>         | BI294732  | gene silencing                                                  |
| 5   | WKY    | 1379249_at   | Wilms tumor 1-associating protein                                                         | <i>Wtap</i>          | AA900400  | transcriptional regulation; Wnt signaling                       |
| 5   | WKY    | 1382291_at   | SRY sex determining region Y-box 9 protein                                                | <i>Sox9</i>          | AI454332  | transcriptional regulation; normal skeletal development         |
| 5   | WKY    | 1385871_at   | DEAH (Asp-Glu-Ala-His) box polypeptide 36                                                 | <i>Dhx36</i>         | AA859982  | mRNA degradation and deadenylation                              |
| 5   | WKY    | 1385892_at   | host cell factor 2                                                                        | <i>HCFC2</i>         | AA900322  | RNA polymerase II promoter transcriptional regulation           |
| 4   | WKY    | 1379615_at   | kelch domain containing 5                                                                 | <i>Klhdc5</i>        | AI011501  | transcriptional regulation; repression; BTB/POZ domain          |
| 4   | WKY    | 1379735_at   | TAF7 RNA polymerase II, TBP-associated factor, 55kDa                                      | <i>Taf7</i>          | AA850836  | component of TFIID                                              |
| 4   | WKY    | 1380651_at   | ring finger protein (C3H2C3 type) 6                                                       | <i>Rnf6</i>          | BI296352  | DNA-dependent transcriptional regulation                        |
| 4   | WKY    | 1380948_at   | myocyte enhancer factor 2C                                                                | <i>Mef2c</i>         | BF414312  | interaction with MyoD family of transcriptional activators      |
| 4   | WKY    | 1381386_at   | ring finger protein 10                                                                    | <i>Rnf10</i>         | AI407297  | transcription factor                                            |
| 4   | WKY    | 1381445_at   | estrogen-related receptor gamma                                                           | <i>Esrrg</i>         | AA996810  | Orphan receptor; transcription activator                        |
| 4   | WKY    | 1387060_at   | Kruppel-like factor 6                                                                     | <i>Klf6</i>          | NM_031642 | Transcriptional activator; binds a GC box motif                 |
| 4   | WKY    | 1387795_at   | polymerase (DNA directed), alpha 2                                                        | <i>Pola2</i>         | NM_053480 | early stage of chromosomal DNA replication                      |
| 4   | WKY    | 1393259_at   | avian musculoaponeurotic fibrosarcoma (v-maf)                                             | <i>Maf</i>           | AI044342  | transcriptional regulation of amino acid metabolism             |
| 3   | WKY    | 1382205_at   | Zic family member 1                                                                       | <i>Zic1</i>          | AW527509  | transcription factor                                            |
| 3   | WKY    | 1382308_at   | ring finger and CCCH-type zinc finger domains 2                                           | <i>Rc3h2</i>         | AI717668  | transcription factor                                            |
| 3   | WKY    | *1382524_at  | zinc finger and BTB domain containing 20                                                  | <i>Zbtb20</i>        | AA850361  | transcription factor                                            |
| 3   | WKY    | *1393585_at  | zinc finger and BTB domain containing 20                                                  | <i>Zbtb20</i>        | AI145951  | transcription factor                                            |
| 3   | WKY    | 1384272_at   | zinc finger protein 365                                                                   | <i>Zfp365</i>        | BG378837  | transcription factor                                            |
| 3   | WKY    | 1384794_at   | glucocorticoid modulatory element binding protein 1                                       | <i>Gmeb1</i>         | BE106136  | transcription regulation by glucocorticoids                     |
| 3   | WKY    | 1390813_at   | RNA-binding protein Musashi-2                                                             | <i>Msi2</i>          | AI236624  | RNA binding; translational regulation                           |
| 3   | WKY    | 1394620_at   | metallothionein-1 pseudogene a                                                            | <i>MT-1-pseudo-a</i> | BI288579  | transcriptional regulation by heavy metals and glucocorticoids  |
| 5   | GK     | 1380094_a_at | zinc finger protein 212                                                                   | <i>Zfp212</i>        | AI178375  | transcription factor                                            |
| 5   | GK     | 1381414_at   | zinc finger protein 26                                                                    | <i>Zfp26</i>         | AA964872  | transcription factor                                            |
| 5   | GK     | 1383577_at   | RAB, member of RAS oncogene family-like 3                                                 | <i>Rab13</i>         | AA859277  | transcriptional regulation; Ras signaling                       |
| 5   | GK     | 1386621_at   | nuclear fragile X mental retardation interacting protein 2                                | <i>Nufip2</i>        | AW142419  | RNA binding; cell cycle modulated                               |
| 5   | GK     | 1390979_at   | mouse zinc finger protein 14-like                                                         | <i>Zfp14</i>         | AI409884  | transcription factor                                            |
| 5   | GK     | *1383108_at  | TAF13 RNA polymerase II, TBP-associated factor                                            | <i>Taf13</i>         | BE120513  | transcription factor                                            |
| 4   | GK     | *1374177_at  | TAF13 RNA polymerase II, TBP-associated factor                                            | <i>Taf13</i>         | AI230912  | transcription factor                                            |
| 4   | GK     | 1382648_at   | glutamyl-prolyl-tRNA synthetase                                                           | <i>Eprs</i>          | AI235566  | aminoacylation of glutamic acid and proline tRNA                |
| 4   | GK     | 1391600_at   | MAX gene associated                                                                       | <i>Mga</i>           | BE118049  | transcription factor                                            |
| 4   | GK     | 1392598_at   | DnaJ (Hsp40) homolog, subfamily B, member 6                                               | <i>Dnajb6</i>        | AA899326  | molecular chaperone                                             |
| 4   | GK     | 1395523_at   | RNA binding motif protein, X-linked                                                       | <i>RbmX</i>          | AW523475  | RNA-binding; pre-mRNA splicing                                  |
| 4   | GK     | 1396743_at   | heterogeneous nuclear ribonucleoprotein D (AU-rich element RNA bp 1, 37kDa)               | <i>Hnrmpd</i>        | BF391580  | transcription factor; telomere elongation                       |
| 3   | GK     | 1368321_at   | early growth response 1                                                                   | <i>Egr1</i>          | NM_012551 | transcription factor                                            |
| 3   | GK     | 1373759_at   | FBJ murine osteosarcoma viral oncogene homolog B                                          | <i>FosB</i>          | BF522317  | transcription factor complex AP-1 formation                     |
| 3   | GK     | 1375043_at   | FBJ osteosarcoma oncogene                                                                 | <i>Fos</i>           | BF415939  | transcription factor complex AP-1 formation                     |
| 3   | GK     | 1373786_at   | zinc finger protein 703                                                                   | <i>Zfp703</i>        | AA924756  | transcriptional repressor                                       |
| 3   | GK     | 1375655_at   | cAMP responsive element binding protein 1                                                 | <i>Creb1</i>         | BE107208  | transcription factor                                            |
| 3   | GK     | 1379346_at   | cell division cycle 73, Paf1/RNA polymerase II complex component, homolog (S. cerevisiae) | <i>Cdc73</i>         | BI290578  | transcriptional and post-transcriptional regulation; cell cycle |
| 3   | GK     | 1382368_at   | TROVE domain family, member 2                                                             | <i>Trove2</i>        | AA943075  | RNA-binding; RNA stabilization                                  |
| 3   | GK     | 1387870_at   | zinc finger protein 36                                                                    | <i>Zfp36</i>         | AB025017  | transcription factor                                            |
| 3   | GK     | 1392283_at   | sal-like 4                                                                                | <i>Sall4</i>         | BI288834  | transcription factor                                            |
| 3   | GK     | 1392392_at   | nuclear receptor co-repressor 1                                                           | <i>Ncor1</i>         | AI012510  | activating subunit for histone deacetylase 3                    |
| 3   | GK     | 1392631_at   | Sp1 transcription factor                                                                  | <i>Sp1</i>           | AA900254  | transcription factor                                            |
| 3   | GK     | 1393718_at   | ligand dependent nuclear receptor corepressor                                             | <i>Lcor</i>          | BE117189  | transcriptional corepressor                                     |
| 3   | GK     | 1393075_at   | LON peptidase N-terminal domain and ring finger 3                                         | <i>Lonrf3</i>        | BF386199  | Transcription factor                                            |

**D. Signal Transduction (28 probe sets, 28 genes)**

| Age | Strain | Probe ID     | Gene Name                                                                    | Symbol         | Accession | Gene Function                                                            |
|-----|--------|--------------|------------------------------------------------------------------------------|----------------|-----------|--------------------------------------------------------------------------|
| 5   | WKY    | 1370114_a_at | phosphatidylinositol 3-kinase, regulatory, polypeptide 1                     | <i>Pik3a</i>   | D64048    | insulin signaling                                                        |
| 5   | WKY    | 1371960_at   | YTH domain family 2                                                          | <i>Ythdf2</i>  | AI230548  | insulin/insulin like growth factor signaling                             |
| 5   | WKY    | 1395073_at   | ecotropic viral integration site 1                                           | <i>Evi1</i>    | BI288681  | inhibitor of c-jun N-terminal kinase; stimulator of PI3K/AKT signalling. |
| 4   | WKY    | 1387348_at   | insulin-like growth factor binding protein 5                                 | <i>Igf-bp5</i> | BE1132270 | insulin growth factor signaling                                          |
| 4   | WKY    | 1395020_at   | pleckstrin homology domain containing, family H (with MyTH4 domain) member 1 | <i>Plekhh1</i> | BI275435  | domain present in many signaling proteins                                |

Table 3. Cont'd.

**D. Signal Transduction (28 probe sets, 28 genes)**

| Age | Strain | Probe ID     | Gene Name                                                              | Symbol         | Accession | Gene Function                                                                 |
|-----|--------|--------------|------------------------------------------------------------------------|----------------|-----------|-------------------------------------------------------------------------------|
| 3   | WKY    | 1368872_a_at | homer homolog 2                                                        | <i>Vesl-2</i>  | NM_053309 | scaffolding protein                                                           |
| 3   | WKY    | 1369097_s_at | guanylate cyclase 1, soluble, beta 3                                   | <i>Gucy1b3</i> | NM_012769 | conversion of GTP to the second messenger cGMP                                |
| 3   | WKY    | 1372628_at   | adaptor-related protein complex AP-4, sigma 1                          | <i>Ap4s1</i>   | AA800277  | protein targeting to endosome-lysosome                                        |
| 3   | WKY    | 1372993_at   | insulin-like growth factor 2 receptor                                  | <i>Lgf2r</i>   | BI299621  | protein targeting to lysosome                                                 |
| 3   | WKY    | 1385275_at   | wingless-related MMTV integration site 16                              | <i>Wnt16</i>   | BF391286  | Wnt signaling                                                                 |
| 3   | WKY    | 1389093_at   | p21 (CDKN1A)-activated kinase 1                                        | <i>Pak1</i>    | BI281735  | activation of Rho-related GTPases; microtubule biogenesis                     |
| 3   | WKY    | 1395337_at   | tight junction protein 1                                               | <i>Tjp1</i>    | AW141192  | signal transduction; tight junction assembly                                  |
| 3   | WKY    | 1398288_at   | angiotensin II receptor, type 2                                        | <i>Agtr2</i>   | BF552873  | angiotensin II receptor; cell proliferation                                   |
| 5   | GK     | 1368690_a_at | glutamate receptor, metabotropic 4                                     | <i>Grm4</i>    | U47331    | glutamate receptor                                                            |
| 5   | GK     | 1392382_at   | transforming growth factor, beta 2                                     | <i>Tgfb2</i>   | BE117736  | suppressor of interleukin-2 dependent T-cell growth; cytosolic calcium signal |
| 5   | GK     | 1392767_at   | TBC1 domain family, member 20                                          | <i>Tbc1d20</i> | AI502349  | GTPase-activating protein for Rab family protein                              |
| 4   | GK     | 1373582_at   | CAP-GLY domain containing linker protein 3                             | <i>Clp3</i>    | BF418394  | Akt signaling; cellular compartmentalization                                  |
| 4   | GK     | 1384143_at   | cingulin                                                               | <i>Cgn</i>     | BE114778  | tight junction formation                                                      |
| 3   | GK     | 1368064_a_at | dopa decarboxylase                                                     | <i>Ddc</i>     | U31884    | catecholamine synthesis                                                       |
| 3   | GK     | 1369050_at   | phosphatidylinositol 3-kinase, C2 domain containing, gamma polypeptide | <i>Pik3c2g</i> | NM_053923 | insulin signaling                                                             |
| 3   | GK     | 1370047_at   | ectonucleotide pyrophosphatase/phosphodiesterase 1                     | <i>Enpp1</i>   | NM_053535 | insulin signaling                                                             |
| 3   | GK     | 1378871_at   | brain-specific angiogenesis inhibitor 2                                | <i>Bai2</i>    | AA924656  | angiogenesis inhibition                                                       |
| 3   | GK     | 1379433_at   | phosphatidylinositol 3-kinase, C2 domain containing, alpha polypeptide | <i>Pik3c2a</i> | AI059449  | insulin signaling                                                             |
| 3   | GK     | 1382774_at   | frequently rearranged in advanced T-cell lymphomas                     | <i>Frat1</i>   | AA997070  | positive regulation of the Wnt signaling pathway                              |
| 3   | GK     | 1383644_at   | natriuretic peptide receptor C/guanylate cyclase C                     | <i>Npr3</i>    | BM385202  | Receptor for natriuretic peptide hormones                                     |
| 3   | GK     | 1385014_at   | nudix (nucleoside diphosphate linked moiety X)-type motif 10           | <i>Nudt10</i>  | BG377996  | phosphohydrolases targeted diphosphoinositol polyphosphates                   |
| 3   | GK     | 1389409_at   | testis derived transcript (3 LIM domains)                              | <i>Tes</i>     | AI177869  | Lim domains; protein interactions in signaling                                |
| 3   | GK     | 1397745_at   | mindbomb homolog 1                                                     | <i>Mib1</i>    | BF414336  | Notch signaling                                                               |

**E. Small Molecule Metabolism (11 probe sets, 10 genes)**

| Age | Strain | Probe ID    | Gene Name                                                | Symbol         | Accession | Gene Function                                   |
|-----|--------|-------------|----------------------------------------------------------|----------------|-----------|-------------------------------------------------|
| 5   | WKY    | 1370902_at  | aldo-keto reductase family 1, member B8                  | <i>Akr1b8</i>  | AI233740  | detoxification of xenobiotics                   |
| 5   | WKY    | 1389369_at  | superoxide dismutase 2, mitochondrial                    | <i>Sod2</i>    | BF289017  | oxidative radical detoxification                |
| 4   | WKY    | *1387296_at | cytochrome P450, family 2, subfamily J, polypeptide 4    | <i>Cyp2J4</i>  | NM_023025 | arachidonic acid metabolism                     |
| 4   | WKY    | *1396327_at | cytochrome P450, family 2, subfamily J, polypeptide 4    | <i>Cyp2J4</i>  | BG374493  | arachidonic acid metabolism                     |
| 3   | WKY    | 1392539_at  | biliverdin reductase B (flavin reductase (NADPH))        | <i>Blvrb</i>   | AI009013  | antioxidation; heme metabolism                  |
| 5   | GK     | 1375909_at  | glutathione S-transferase, mu-4                          | <i>Gstm4</i>   | BI285792  | oxidative stress; xenobiotic degradation        |
| 5   | GK     | 1395190_at  | aldo-keto reductase family 1, member B10                 | <i>Akr1b10</i> | AI408099  | aliphatic and aromatic aldehyde detoxification  |
| 4   | GK     | 1368826_at  | catechol-O-methyltransferase                             | <i>Comt</i>    | NM_012531 | catecholamines and catechol estrogen metabolism |
| 4   | GK     | 1394839_at  | phosphoribosylglycinamide formyltransferase              | <i>Gart</i>    | AA850773  | de novo purine biosynthesis                     |
| 3   | GK     | 1380432_at  | cytidine monophospho-N-acetylneuraminic acid hydroxylase | <i>Cmah</i>    | AI014030  | glycoprotein metabolism                         |
| 3   | GK     | 1390777_at  | sterol-C5-desaturase                                     | <i>Sc5dL</i>   | AI710051  | cholesterol biosynthesis                        |

**F. Transport (18 probe sets, 15 genes)**

| Age | Strain | Probe ID      | Gene Name                                                           | Symbol          | Accession | Gene Function                                        |
|-----|--------|---------------|---------------------------------------------------------------------|-----------------|-----------|------------------------------------------------------|
| 5   | WKY    | 1368440_at    | solute carrier family 3, member 1                                   | <i>Slc3a1</i>   | NM_017216 | neutral amino acid transport                         |
| 5   | WKY    | 1390835_at    | solute carrier family 47, member 1                                  | <i>Slc47a1</i>  | AI013568  | cationic drug transport                              |
| 4   | WKY    | 1369690_at    | solute carrier family 2, member 13                                  | <i>Slc2a13</i>  | NM_133611 | H(+)-myo-inositol cotransporter                      |
| 3   | WKY    | 1368696_at    | FXD domain-containing ion transport regulator 7                     | <i>Fxyd7</i>    | NM_022008 | ion transport regulation                             |
| 3   | WKY    | 1375071_at    | nucleoporin 133                                                     | <i>Nup133</i>   | BE119719  | RNA nuclear export                                   |
| 3   | WKY    | 1377765_at    | chloride intracellular channel 4                                    | <i>Clc4</i>     | AA848723  | chloride channel; regulator of pore-forming function |
| 3   | WKY    | 1390530_at    | solute carrier family 16, member 12                                 | <i>Slc16a12</i> | AI169239  | Proton-linked monocarboxylate transporter            |
| 5   | GK     | *1368418_a_at | GPI-anchored ceruloplasmin                                          | <i>Cp</i>       | AF202115  | iron transport regulation                            |
| 5   | GK     | *1368419_at   | GPI-anchored ceruloplasmin                                          | <i>Cp</i>       | AF202115  | iron transport regulation                            |
| 5   | GK     | *1382431_at   | ATP-binding cassette, sub-family A, member 1                        | <i>Abca1</i>    | AI103530  | cholesterol efflux transporter                       |
| 5   | GK     | 1386770_x_at  | potassium voltage-gated channel, Isk-related family member 2        | <i>Kcne2</i>    | AW920063  | voltage-gated potassium channel                      |
| 4   | GK     | 1370176_at    | trafficking protein, kinesin binding 2                              | <i>Trak2</i>    | BG378620  | intracellular protein transport                      |
| 4   | GK     | 1380981_at    | stonin 2                                                            | <i>Ston2</i>    | AW534519  | endocytosis                                          |
| 3   | GK     | *1368317_at   | aquaporin 7                                                         | <i>Aqp7</i>     | NM_019157 | urea and glycerol channel                            |
| 3   | GK     | *1391500_at   | aquaporin 7                                                         | <i>Aqp7</i>     | BF282889  | urea and glycerol channel                            |
| 3   | GK     | 1392531_at    | tocopherol (alpha) transfer protein-like                            | <i>Ttpal</i>    | AI178693  | alpha-tocopherol transport                           |
| 3   | GK     | *1394490_at   | ATP-binding cassette 1, sub-family A, member 1                      | <i>Abca1</i>    | AI502114  | cholesterol efflux transporter                       |
| 3   | GK     | 1398635_at    | solute carrier family 10 (sodium/bile acid cotransporter), member 6 | <i>Slc10a6</i>  | BF565662  | sulfo-conjugated steroid hormone transporter         |

**G. Protein Processing (17 probe sets, 16 genes)**

| Age | Strain | Probe ID   | Gene Name            | Symbol        | Accession | Gene Function   |
|-----|--------|------------|----------------------|---------------|-----------|-----------------|
| 4   | WKY    | 1379747_at | Protease, serine, 35 | <i>Prss35</i> | AA866443  | serine protease |

Table 3. Cont'd.

**G. Protein Processing (17 probe sets, 16 genes)**

| Age | Strain | Probe ID     | Gene Name                                                 | Symbol            | Accession | Gene Function                                         |
|-----|--------|--------------|-----------------------------------------------------------|-------------------|-----------|-------------------------------------------------------|
| 4   | WKY    | 1381503_at   | DNA-damage inducible protein 2                            | <i>Ddi2</i>       | AI073168  | endopeptidase activity; protein catabolism            |
| 3   | WKY    | 1369215_a_at | carboxypeptidase D                                        | <i>Cpd</i>        | NM_012836 | trans-Golgi network trafficking                       |
| 3   | WKY    | 1376129_at   | vacuolar protein sorting 13 homolog C                     | <i>Vps13c</i>     | BE108174  | structural component of cytoskeleton                  |
| 3   | WKY    | 1379390_at   | ST6-N-acetylgalactosaminide alpha-2,6-sialyltransferase 2 | <i>St6galnac2</i> | AA891414  | protein glycosylation                                 |
| 5   | GK     | 1383510_at   | Ubiquitin protein ligase E3A                              | <i>Ube3a</i>      | AI230360  | Protein degradation; protein ubiquitination.          |
| 4   | GK     | 1381990_at   | N-acetylgalactosaminyltransferase 1                       | <i>Galnt1</i>     | AA963979  | glycoprotein synthesis                                |
| 4   | GK     | 1385099_at   | scieillin                                                 | <i>Scel</i>       | BG378310  | structural protein                                    |
| 4   | GK     | 1393617_at   | SH3 domain containing ring finger 2                       | <i>Sh3rf2</i>     | AW530317  | E3 ubiquitin-protein ligase                           |
| 4   | GK     | *1393842_at  | coiled-coil domain containing 77                          | <i>Ccdc77</i>     | BF391556  | glycoprotein synthesis                                |
| 3   | GK     | *1390284_at  | coiled-coil domain containing 77                          | <i>Ccdc77</i>     | BM383683  | glycoprotein synthesis                                |
| 3   | GK     | 1370007_at   | protein disulfide isomerase family A, member 4            | <i>Pdia4</i>      | NM_053849 | catalyze the rearrangement of -S-S- bonds in proteins |
| 3   | GK     | 1371442_at   | hypoxia up-regulated 1                                    | <i>Hyo1</i>       | BI282904  | molecular chaperone; protein folding                  |
| 3   | GK     | 1373152_at   | protease, serine, 23                                      | <i>Prss23</i>     | AI177099  | serine protease                                       |
| 3   | GK     | 1384254_at   | OTU domain containing 1                                   | <i>Otud1</i>      | AI717553  | ubiquitin removal; protein turnover                   |
| 3   | GK     | 1392961_at   | MOB1, Mps one binder kinase activator-like 1B             | <i>Mobkl1b</i>    | AW534383  | serine/threonine kinase activity                      |
| 3   | GK     | 1393387_at   | 26 serine protease                                        | <i>P11</i>        | BF411859  | protease activity                                     |

**H. Cell Cycle/Cell Growth (10 probe sets, 10 genes)**

| Age | Strain | Probe ID     | Gene Name                                                     | Symbol        | Accession | Gene Function                             |
|-----|--------|--------------|---------------------------------------------------------------|---------------|-----------|-------------------------------------------|
| 5   | WKY    | 1390722_at   | nuclear casein kinase and cyclin-dependent kinase substrate 1 | <i>Nucks1</i> | AW531272  | substrate of cdk1                         |
| 4   | WKY    | 1376875_at   | telomeric repeat binding factor 2                             | <i>Terf2</i>  | AI454691  | cell cycle regulation                     |
| 3   | WKY    | 1372685_at   | cyclin-dependent kinase inhibitor 3                           | <i>Cdkn3</i>  | BE113362  | cell cycle regulation                     |
| 5   | GK     | 1378419_at   | ribonuclease, RNase A family, 2                               | <i>Rhase2</i> | AI177934  | RNA catabolism                            |
| 5   | GK     | 1383977_a_at | RRS1 ribosome biogenesis regulator homolog                    | <i>Rrs1</i>   | BM388500  | ribosome biogenesis                       |
| 5   | GK     | 1388578_at   | TatD DNase domain containing 3                                | <i>Tatdn3</i> | BI288621  | deoxyribonuclease                         |
| 4   | GK     | 1368290_at   | cysteine rich protein 61                                      | <i>Cyr61</i>  | NM_031327 | extracellular signaling molecule          |
| 3   | GK     | 1369595_at   | fibroblast growth factor 23                                   | <i>Fgf23</i>  | NM_130754 | signaling molecule                        |
| 3   | GK     | 1382089_at   | maternally expressed 3                                        | <i>Meg3</i>   | AI070489  | negative regulation of cell proliferation |
| 3   | GK     | 1398679_at   | REX2, RNA exonuclease 2 homolog                               | <i>Rexo2</i>  | AI639098  | DNA and RNA metabolism                    |

**I. Miscellaneous (20 probe sets, 20 genes)**

| Age | Strain | Probe ID     | Gene Name                                         | Symbol         | Accession | Gene Function                                                          |
|-----|--------|--------------|---------------------------------------------------|----------------|-----------|------------------------------------------------------------------------|
| 5   | WKY    | 1377778_at   | ischemia related factor vof-16                    | <i>Vof-16</i>  | BE107282  | ischemia                                                               |
| 4   | WKY    | 1368250_at   | tektin 1                                          | <i>Tekt1</i>   | NM_053508 | structural component of ciliary and flagellar microtubules             |
| 4   | WKY    | 1370511_at   | fibrinogen, B beta polypeptide                    | <i>Fgb</i>     | U05675    | fibrin formation; cofactor in platelet aggregation                     |
| 4   | WKY    | 1382193_at   | CDGSH iron sulfur domain 2                        | <i>Cisd2</i>   | BI294188  | calcium homeostasis                                                    |
| 4   | WKY    | 1385465_at   | sialic acid binding Ig-like lectin 5              | <i>Stglec5</i> | BG379188  | mediates sialic-acid dependent binding to cells                        |
| 4   | WKY    | 1386941_at   | plectin 1                                         | <i>Plec1</i>   | NM_022401 | cross-linking and stabilization of cytoskeletal intermediate filaments |
| 4   | WKY    | 1392411_at   | tubulointerstitial nephritis antigen              | <i>Tinag</i>   | AI411848  | mediates adhesion of proximal tubule epithelial cells                  |
| 3   | WKY    | 1370350_x_at | urinary protein 2                                 | <i>Rup2</i>    | AF368860  | secreted protein                                                       |
| 3   | WKY    | 1370597_at   | syntaxin 17                                       | <i>Stx17</i>   | AF115435  | Implicated in vesicle trafficking to lysosomes                         |
| 3   | WKY    | 1371245_a_at | hemoglobin, beta                                  | <i>Hbb</i>     | BI287300  | component of hemoglobin tetramer                                       |
| 3   | WKY    | 1376311_at   | netrin G1                                         | <i>Ntn1</i>    | BM391312  | regulates cell adhesion, motility, proliferation, differentiation      |
| 3   | WKY    | 1385673_at   | replication protein A complex interacting protein | <i>Rpain</i>   | BG666060  | import of RPA complex into the nucleus                                 |
| 3   | WKY    | 1389918_at   | palladin, cytoskeletal associated protein         | <i>Pall</i>    | BM391364  | cell shape, adhesion                                                   |
| 3   | WKY    | 1393705_at   | CD2-associated protein                            | <i>Cd2ap</i>   | AA819035  | regulator of actin cytoskeleton                                        |
| 5   | GK     | 1381434_s_at | nidogen 2                                         | <i>Nid2</i>    | AW253721  | cell-extracellular matrix interactions                                 |
| 5   | GK     | 1394459_at   | protein CXorf17 homolog                           | <i>CXorf17</i> | AI715738  | transmembrane protein                                                  |
| 3   | GK     | 1373162_at   | transmembrane protein 41A                         | <i>Tmem41a</i> | AI600085  | cell-cell interactions                                                 |
| 3   | GK     | 1378866_at   | actin-binding LIM protein 1                       | <i>Ablim1</i>  | BF401176  | Cytoskeletal organization                                              |
| 3   | GK     | 1389086_at   | sushi domain containing 4                         | <i>Susd4</i>   | BF408444  | transmembrane protein                                                  |
| 3   | GK     | 1391552_at   | translin                                          | <i>Tsn</i>     | BM391661  | chromosomal translocation                                              |

**J. ESTs (104 probe sets)**

| Age | Strain | Probe ID   | Gene Name | Symbol | Accession | Gene Function |
|-----|--------|------------|-----------|--------|-----------|---------------|
| 5   | WKY    | 1374583_at | EST       | ---    | BI288131  | Unknown       |
| 5   | WKY    | 1376332_at | EST       | ---    | BF396082  | Unknown       |
| 5   | WKY    | 1376840_at | EST       | ---    | AI103040  | Unknown       |
| 5   | WKY    | 1378492_at | EST       | ---    | BF396209  | Unknown       |
| 5   | WKY    | 1381508_at | EST       | ---    | BE098143  | Unknown       |
| 5   | WKY    | 1383058_at | EST       | ---    | AI410438  | Unknown       |
| 5   | WKY    | 1383923_at | EST       | ---    | BF410662  | Unknown       |

Table 3. Cont'd.

## J. ESTs (104 probe sets)

| Age | Strain | Probe ID     | Gene Name | Symbol | Accession | Gene Function |
|-----|--------|--------------|-----------|--------|-----------|---------------|
| 5   | WKY    | 1384104_at   | EST       | ---    | BE115892  | Unknown       |
| 5   | WKY    | 1386855_at   | EST       | ---    | AA944136  | Unknown       |
| 5   | WKY    | 1392788_at   | EST       | ---    | AA944323  | Unknown       |
| 5   | WKY    | 1392954_at   | EST       | ---    | AI029637  | Unknown       |
| 5   | WKY    | 1394756_at   | EST       | ---    | AA955494  | Unknown       |
| 5   | WKY    | 1395112_at   | EST       | ---    | AI555810  | Unknown       |
| 5   | WKY    | 1395829_at   | EST       | ---    | AI501441  | Unknown       |
| 5   | WKY    | 1396877_at   | EST       | ---    | AI715187  | Unknown       |
| 5   | WKY    | 1398528_at   | EST       | ---    | BE117514  | Unknown       |
| 4   | WKY    | 1374558_at   | EST       | ---    | AI010316  | Unknown       |
| 4   | WKY    | 1378168_at   | EST       | ---    | BG377391  | Unknown       |
| 4   | WKY    | 1379398_at   | EST       | ---    | BM385853  | Unknown       |
| 4   | WKY    | 1380782_at   | EST       | ---    | AW528654  | Unknown       |
| 4   | WKY    | 1381218_at   | EST       | ---    | BF386446  | Unknown       |
| 4   | WKY    | 1382497_at   | EST       | ---    | AA875457  | Unknown       |
| 4   | WKY    | 1382702_at   | EST       | ---    | AA998276  | Unknown       |
| 4   | WKY    | 1382987_at   | EST       | ---    | AA874945  | Unknown       |
| 4   | WKY    | 1391041_at   | EST       | ---    | AI170690  | Unknown       |
| 4   | WKY    | 1391150_at   | EST       | ---    | BM387773  | Unknown       |
| 4   | WKY    | 1391757_at   | EST       | ---    | AA926072  | Unknown       |
| 4   | WKY    | 1392074_at   | EST       | ---    | AA926082  | Unknown       |
| 4   | WKY    | 1395014_at   | EST       | ---    | BI282068  | Unknown       |
| 4   | WKY    | 1395260_at   | EST       | ---    | BM383147  | Unknown       |
| 4   | WKY    | 1395762_at   | EST       | ---    | BG670091  | Unknown       |
| 4   | WKY    | 1396184_at   | EST       | ---    | AW435238  | Unknown       |
| 3   | WKY    | 1375422_at   | EST       | ---    | AI710284  | Unknown       |
| 3   | WKY    | 1377195_at   | EST       | ---    | BF406252  | Unknown       |
| 3   | WKY    | 1378458_at   | EST       | ---    | BI281745  | Unknown       |
| 3   | WKY    | 1380399_at   | EST       | ---    | BF393255  | Unknown       |
| 3   | WKY    | 1381590_at   | EST       | ---    | BI295719  | Unknown       |
| 3   | WKY    | 1381961_at   | EST       | ---    | AI502554  | Unknown       |
| 3   | WKY    | 1382926_s_at | EST       | ---    | BF287720  | Unknown       |
| 3   | WKY    | 1383814_at   | EST       | ---    | BF556870  | Unknown       |
| 3   | WKY    | 1383864_at   | EST       | ---    | BF412512  | Unknown       |
| 3   | WKY    | 1384575_at   | EST       | ---    | AI137418  | Unknown       |
| 3   | WKY    | 1386466_at   | EST       | ---    | H33093    | Unknown       |
| 3   | WKY    | 1390749_at   | EST       | ---    | BF394188  | Unknown       |
| 3   | WKY    | 1391355_at   | EST       | ---    | AW531049  | Unknown       |
| 3   | WKY    | 1391697_at   | EST       | ---    | BM392082  | Unknown       |
| 3   | WKY    | 1392352_at   | EST       | ---    | AW521481  | Unknown       |
| 3   | WKY    | 1392381_at   | EST       | ---    | BM382852  | Unknown       |
| 3   | WKY    | 1392860_at   | EST       | ---    | AI045117  | Unknown       |
| 3   | WKY    | 1393952_at   | EST       | ---    | BI278833  | Unknown       |
| 3   | WKY    | 1395566_at   | EST       | ---    | AW524204  | Unknown       |
| 3   | WKY    | 1396240_at   | EST       | ---    | AI575096  | Unknown       |
| 3   | WKY    | 1397153_at   | EST       | ---    | BE115262  | Unknown       |
| 3   | WKY    | 1397206_at   | EST       | ---    | AI548120  | Unknown       |
| 5   | GK     | 1371776_at   | EST       | ---    | AA819268  | Unknown       |
| 5   | GK     | 1372239_at   | EST       | ---    | AW527228  | Unknown       |
| 5   | GK     | 1374924_at   | EST       | ---    | BE098025  | Unknown       |
| 5   | GK     | 1380165_at   | EST       | ---    | AI234713  | Unknown       |
| 5   | GK     | 1381626_at   | EST       | ---    | BE105470  | Unknown       |
| 5   | GK     | 1381940_at   | EST       | ---    | AW527798  | Unknown       |
| 5   | GK     | 1383117_at   | EST       | ---    | AI232414  | Unknown       |
| 5   | GK     | 1384058_at   | EST       | ---    | AI059089  | Unknown       |
| 5   | GK     | 1386514_at   | EST       | ---    | AA819731  | Unknown       |
| 5   | GK     | 1389935_at   | EST       | ---    | BI300457  | Unknown       |
| 5   | GK     | 1392304_at   | EST       | ---    | BI295865  | Unknown       |
| 5   | GK     | 1392504_at   | EST       | ---    | BI297184  | Unknown       |
| 5   | GK     | 1393169_at   | EST       | ---    | AI578145  | Unknown       |
| 5   | GK     | 1393476_at   | EST       | ---    | AI717594  | Unknown       |
| 5   | GK     | 1395030_at   | EST       | ---    | BM390366  | Unknown       |
| 5   | GK     | 1395361_at   | EST       | ---    | AW142913  | Unknown       |
| 4   | GK     | 1372059_at   | EST       | ---    | AA891759  | Unknown       |
| 4   | GK     | 1377584_at   | EST       | ---    | BI297375  | Unknown       |
| 4   | GK     | 1379034_at   | EST       | ---    | AI029552  | Unknown       |
| 4   | GK     | 1379411_at   | EST       | ---    | AI180253  | Unknown       |

**Table 3. Cont'd.**

*J. ESTs (104 probe sets)*

| Age | Strain | Probe ID   | Gene Name | Symbol | Accession | Gene Function |
|-----|--------|------------|-----------|--------|-----------|---------------|
| 4   | GK     | 1382956_at | EST       | ---    | AA943750  | Unknown       |
| 4   | GK     | 1384309_at | EST       | ---    | BF393535  | Unknown       |
| 4   | GK     | 1384717_at | EST       | ---    | AA894199  | Unknown       |
| 4   | GK     | 1389467_at | EST       | ---    | BM391248  | Unknown       |
| 4   | GK     | 1393916_at | EST       | ---    | AI044713  | Unknown       |
| 4   | GK     | 1395795_at | EST       | ---    | AW528651  | Unknown       |
| 3   | GK     | 1374148_at | EST       | ---    | BI296414  | Unknown       |
| 3   | GK     | 1374606_at | EST       | ---    | BF283073  | Unknown       |
| 3   | GK     | 1375601_at | EST       | ---    | BF410219  | Unknown       |
| 3   | GK     | 1375758_at | EST       | ---    | BF404935  | Unknown       |
| 3   | GK     | 1377316_at | EST       | ---    | BF397728  | Unknown       |
| 3   | GK     | 1378942_at | EST       | ---    | AI234028  | Unknown       |
| 3   | GK     | 1379107_at | EST       | ---    | BF416861  | Unknown       |
| 3   | GK     | 1379859_at | EST       | ---    | AA964506  | Unknown       |
| 3   | GK     | 1379929_at | EST       | ---    | BF405278  | Unknown       |
| 3   | GK     | 1380557_at | EST       | ---    | BE119497  | Unknown       |
| 3   | GK     | 1383608_at | EST       | ---    | AI145231  | Unknown       |
| 3   | GK     | 1390414_at | EST       | ---    | BI296515  | Unknown       |
| 3   | GK     | 1390491_at | EST       | ---    | BM390772  | Unknown       |
| 3   | GK     | 1390906_at | EST       | ---    | BE100932  | Unknown       |
| 3   | GK     | 1391112_at | EST       | ---    | BF405127  | Unknown       |
| 3   | GK     | 1391312_at | EST       | ---    | BE108090  | Unknown       |
| 3   | GK     | 1391793_at | EST       | ---    | BF284687  | Unknown       |
| 3   | GK     | 1392026_at | EST       | ---    | BF391823  | Unknown       |
| 3   | GK     | 1394574_at | EST       | ---    | BF398290  | Unknown       |
| 3   | GK     | 1394689_at | EST       | ---    | BE117217  | Unknown       |
| 3   | GK     | 1394876_at | EST       | ---    | AI454929  | Unknown       |
| 3   | GK     | 1395680_at | EST       | ---    | BF399925  | Unknown       |
| 3   | GK     | 1396067_at | EST       | ---    | AI511395  | Unknown       |
| 3   | GK     | 1396073_at | EST       | ---    | AW527466  | Unknown       |

Column labeled "Strain" indicates the strain which shows higher relative expression of that probe set.  
 Probe sets marked with an asterisk ( \* ) indicates duplicate probe sets for a gene.
